# Supplementary material for: Synthesis of unsymmetrical phosphorus disulfides
Source: Royal Society of Chemistry journal article supplement (doi:10.1039/d4ob01099j), 2024-01-01

## Synthesis of Unsymmetrical Phosphorus Disulfides

Jeffrey Ash and Jun Yong Kang\*

Department of Chemistry and Biochemistry, University of Nevada Las Vegas, 4505 South Maryland  
Parkway, Las Vegas, Nevada, 89154-4003, United States

### Supporting Information

|                                                                                |        |
|--------------------------------------------------------------------------------|--------|
| 1. General information.....                                                    | S2     |
| 2. General experimental procedure .....                                        | S3     |
| 2.1. General procedure for the synthesis of thiosuccinimide <b>1</b> .....     | S3     |
| 2.2. Procedure for the synthesis of thiosuccinimide <b>1p</b> .....            | S3     |
| 2.3. General procedure for the synthesis of thiophosphoric acid <b>2</b> ..... | S3     |
| 3. <sup>1</sup> H, <sup>13</sup> C, and <sup>31</sup> P NMR spectra.....       | S4-S73 |



## 1. General information

All reactions were carried out under air atmosphere in oven-dried glassware with magnetic stirring bar. Dry solvents (THF, toluene, ACN, diethyl ether, and DCM) were obtained by solvent purification system under argon. All commercially available reagents were used as received without further purification. The tubes used for the reaction were showed in **Figure S1**. Purification of reaction products was carried out by flash column chromatography using silica gel 60 (230-400 mesh). Analytical thin layer chromatography was performed on 0.25 mm aluminum-backed silica gel 60-F plates. Visualization was accompanied with UV light and KMnO<sub>4</sub> solution. Concentration under reduced pressure refers to the removal of volatiles using a rotary evaporator attached to a dry diaphragm pump (10-15 mm Hg) followed by pumping to a constant weight with an oil pump (<300 mTorr). Infrared (IR) spectra were recorded on an IR spectrometer with KBr wafers or a film on KBr plate. High-resolution mass spectra (HRMS) were recorded on LCMS-IT-TOF mass spectrometer using ESI (electrospray ionization) or APCI (Atmospheric Pressure Chemical Ionization). <sup>1</sup>H NMR spectra were recorded in CDCl<sub>3</sub> on 400 MHz NMR spectrometer. The <sup>1</sup>H chemical shifts are referenced to residual solvent signals at  $\delta$  7.26 (CHCl<sub>3</sub>) or  $\delta$  0.00 (TMS). <sup>1</sup>H NMR coupling constants (*J*) are reported in Hertz (Hz) and multiplicities are indicated as follows: s (singlet), bs (broad singlet), d (doublet), t (triplet), q (quartet), m (multiplet), dd (doublet of doublets), dt (doublet of triplets), td (triplet of doublets), tt (triplet of triplets). <sup>13</sup>C NMR spectra were proton decoupled and recorded in CDCl<sub>3</sub> on 100.5 MHz NMR spectrometer. The <sup>13</sup>C chemical shifts are referenced to solvent signals at  $\delta$  77.16 (CDCl<sub>3</sub>). <sup>31</sup>P NMR spectra were proton decoupled and recorded in CDCl<sub>3</sub> on 162 MHz NMR spectrometer. <sup>31</sup>P chemical shifts are reported relative to 85% H<sub>3</sub>PO<sub>4</sub> (0.00 ppm) as an external standard.

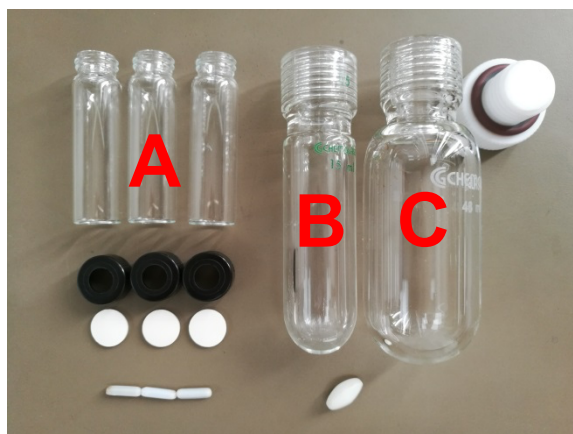

**Figure S1.** Pictorial description of reaction tubes for the reaction.



## 2. General experimental procedure

### 2.1. General procedure for the synthesis of thiosuccinimide 1

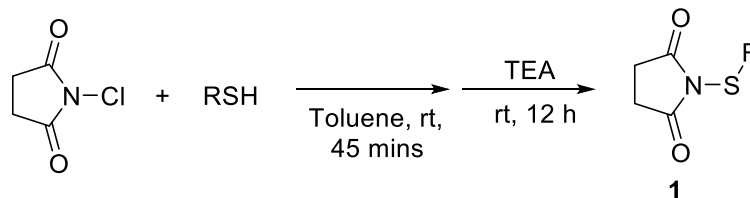

To a solution of thiol (1.0 mmol) in toluene (3.0 mL) was added N-chlorosuccinimide (1.0 mmol) portionwise and was stirred for 45 minutes at room temperature. After 45 min stirring, triethyl amine (1.0 mmol) was added dropwise, and the reaction mixture was stirred for 12 hours. The residue was concentrated under reduced pressure and subjected to column chromatography on silica gel to give the corresponding thiosuccinimides **1**.

### 2.2. General procedure for the synthesis of acyl thiosuccinimide 1p

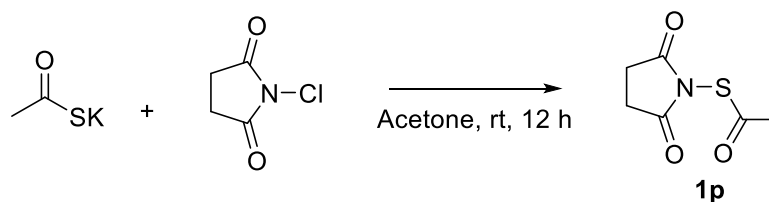

To a solution of potassium thiolate (5.0 mmol) in acetone (25.0 mL) was added N-chlorosuccinimide (5.0 mmol) at room temperature. The reaction mixture was stirred for 12 hours. After stirring for 12 hours at room temperature, the reaction mixture was concentrated under reduced pressure and subjected to column chromatography on silica gel to give the corresponding acyl thio succinimide **1p**.

### 2.3. General procedure for the synthesis of thiophosphoric acid 2

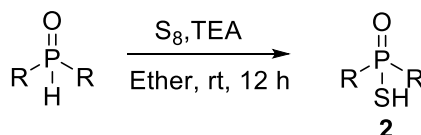

To a solution of H-phosphonate (1.0 mmol) in ether (5.0 mL) was added triethylamine (1.1 mmol), followed by elemental sulfur (1.05 mmol). The reaction was stirred for 12 hours and then washed with 1M HCl (3 X 5.0 mL), followed by washing with brine. The organic extract was dried over sodium sulfate, filtered, and concentrated under reduced pressure to give compound **2**.

## 3. <sup>1</sup>H, <sup>13</sup>C, and <sup>31</sup>P NMR spectra



**<sup>1</sup>H NMR (400 MHz) in CDCl<sub>3</sub>**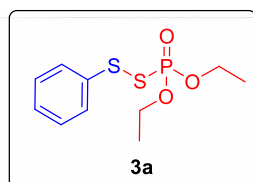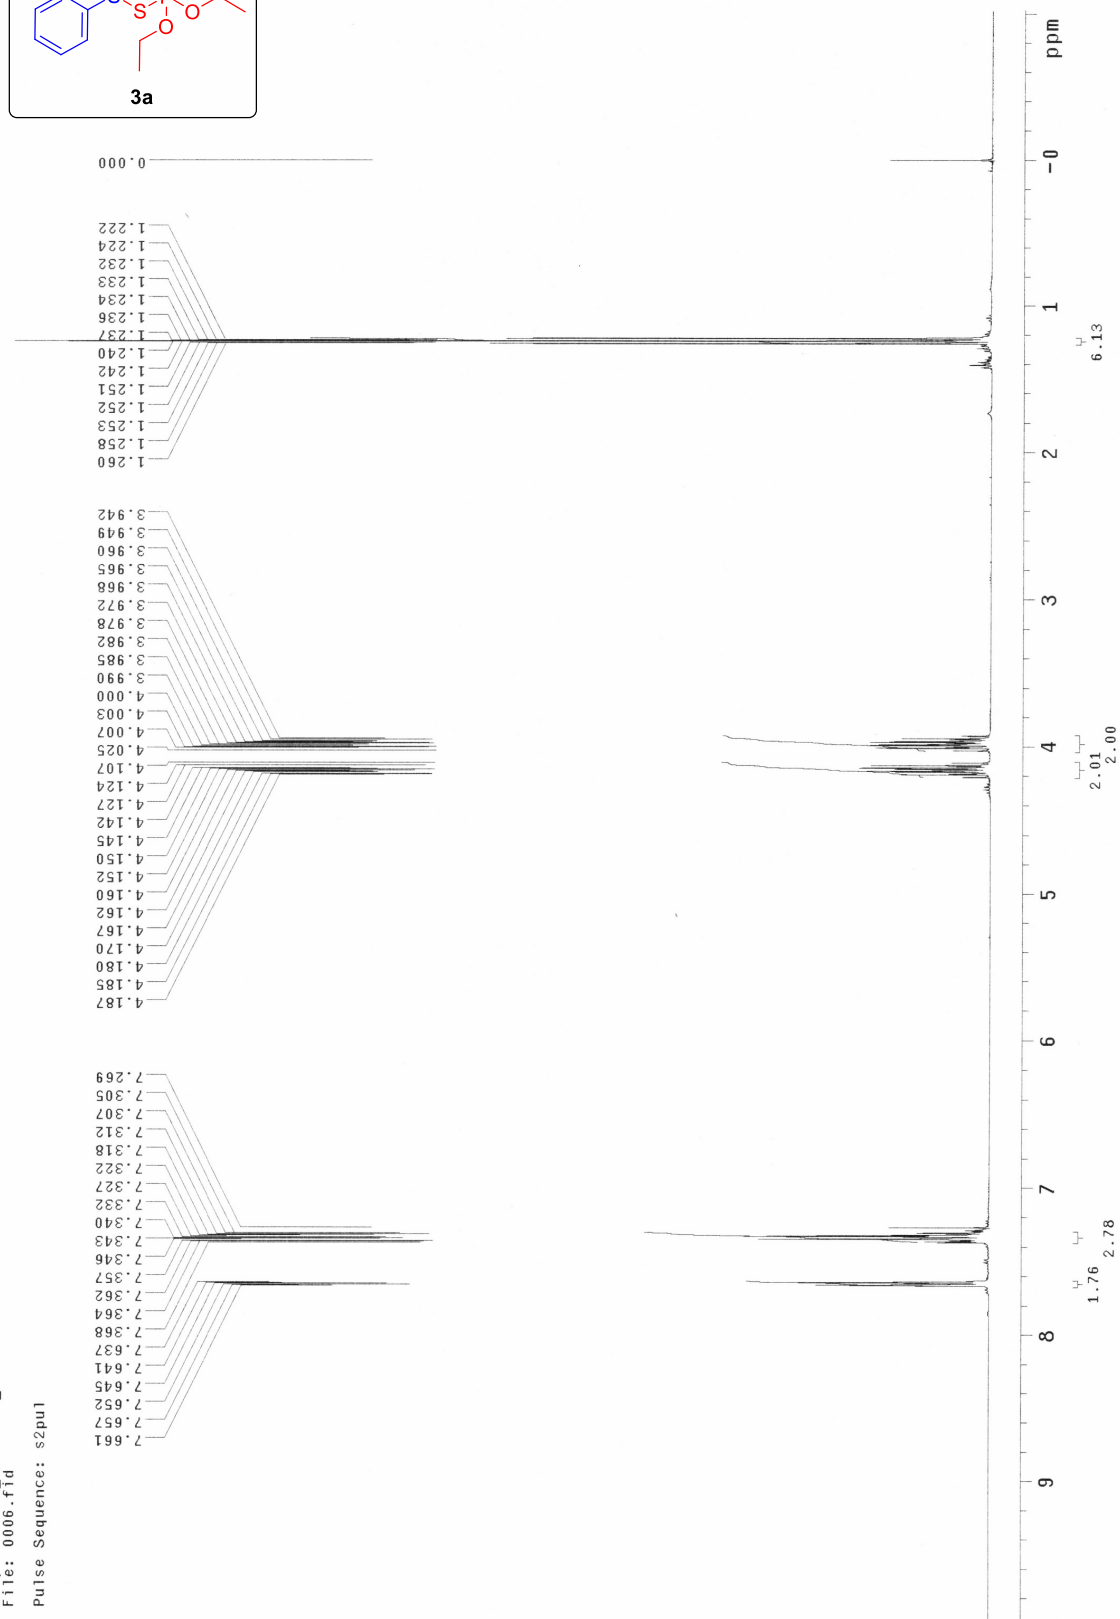

Sample: Ja-7-177-h  
Sample ID: s\_20221012\_07  
File: 0006.fid  
Pulse Sequence: s2pul



$^{13}\text{C}$  NMR (100.5 MHz) in  $\text{CDCl}_3$ 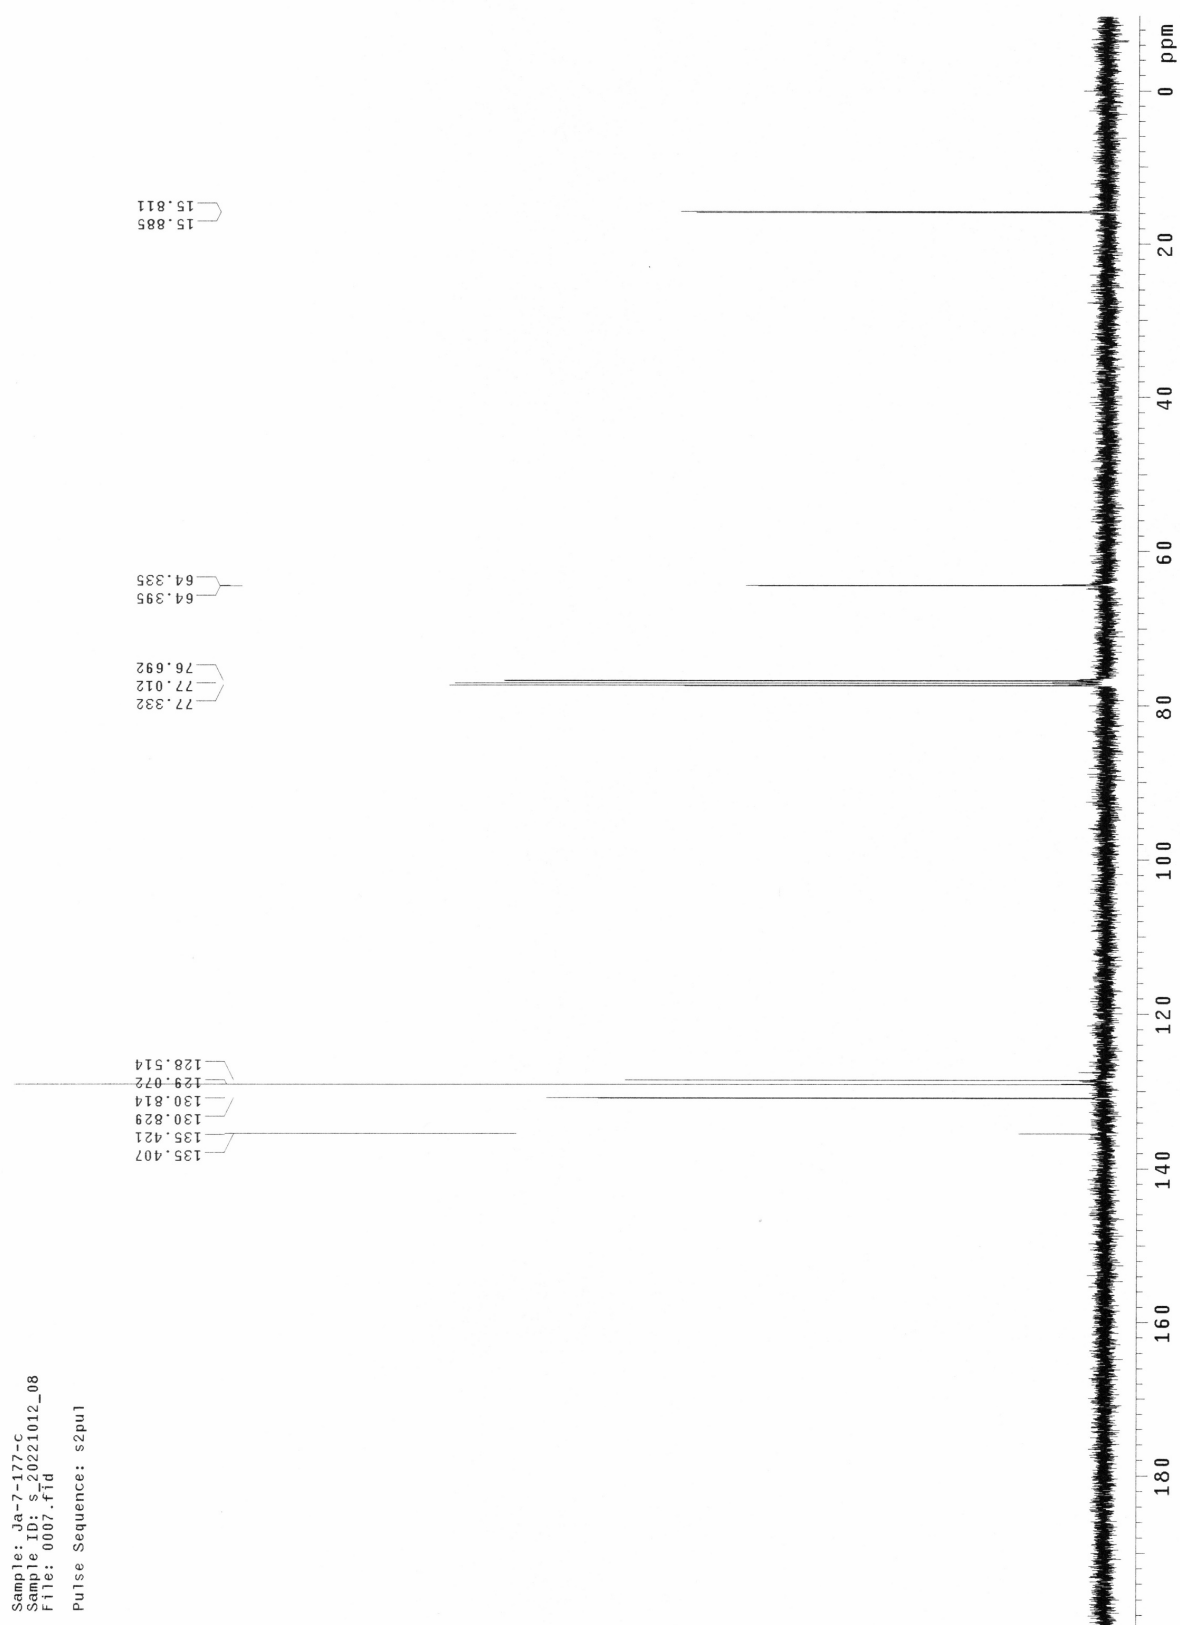



**$^{31}\text{P}$  NMR (162 MHz) in  $\text{CDCl}_3$** 

Sample: Ja-9-177-p  
File: exp

Pulse Sequence: s2pul

Solvent:  $\text{CDCl}_3$   
Temp: 25.0 C / 298.1 K  
Operator: Jykang  
VNMR-400 "Varian-NMR"

Relax. delay 1.000 sec  
Pulse 45.0 degrees  
Acq. time 1.600 sec  
Width 21186.4 Hz  
10 repetitions

OBSERVE P31, 161.7710681 MHz  
DECOUPLE H1, 399.6200193 MHz

Power 40 dB, continuously on  
WALTZ-16 modulated

DATA PROCESSING  
Line broadening 1.0 Hz  
FT size 131072  
Total time 0 min, 26 sec

23.156

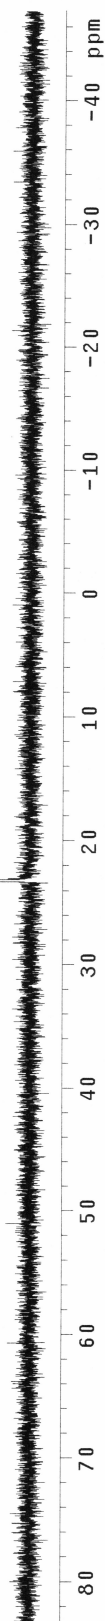



**$^1\text{H}$  NMR (400 MHz) in  $\text{CDCl}_3$** 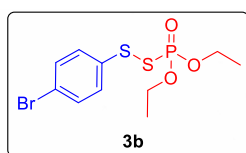

Sample: ja-g-194-c  
Sample ID: s\_20221019\_01  
File: 0024.f1d  
Pulse Sequence: s2pu1

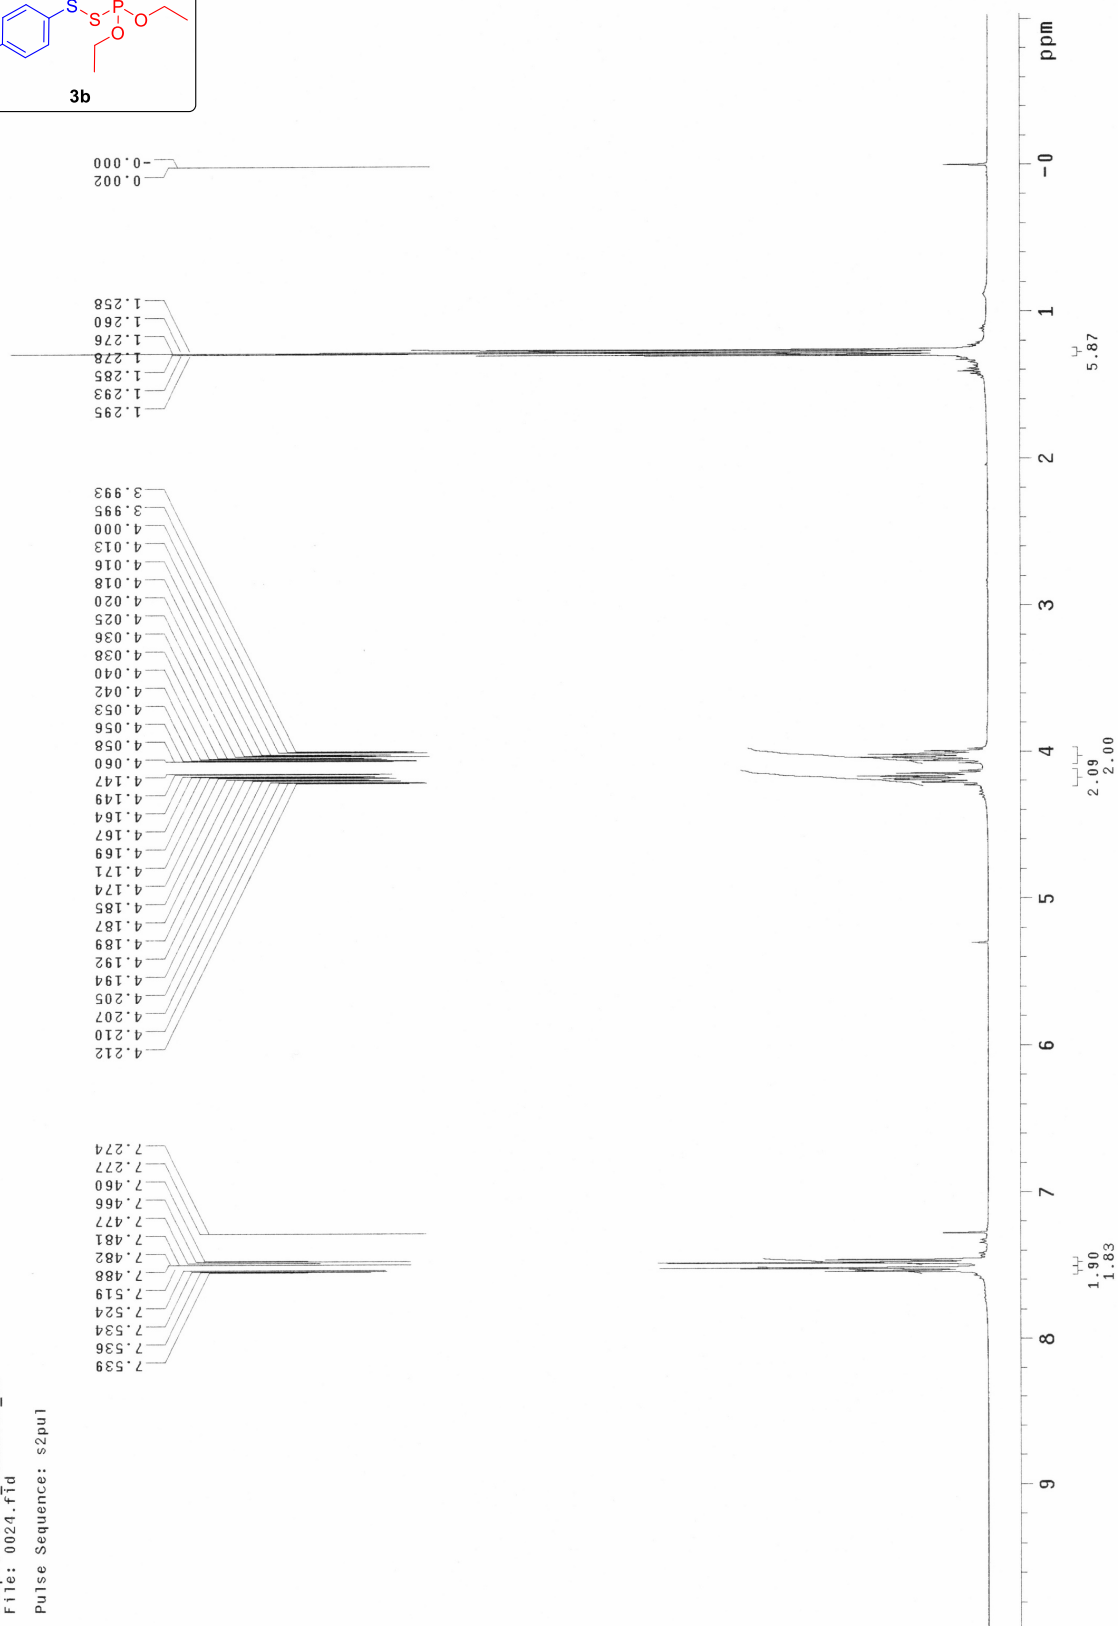



**$^{13}\text{C}$  NMR (100.5 MHz) in  $\text{CDCl}_3$** 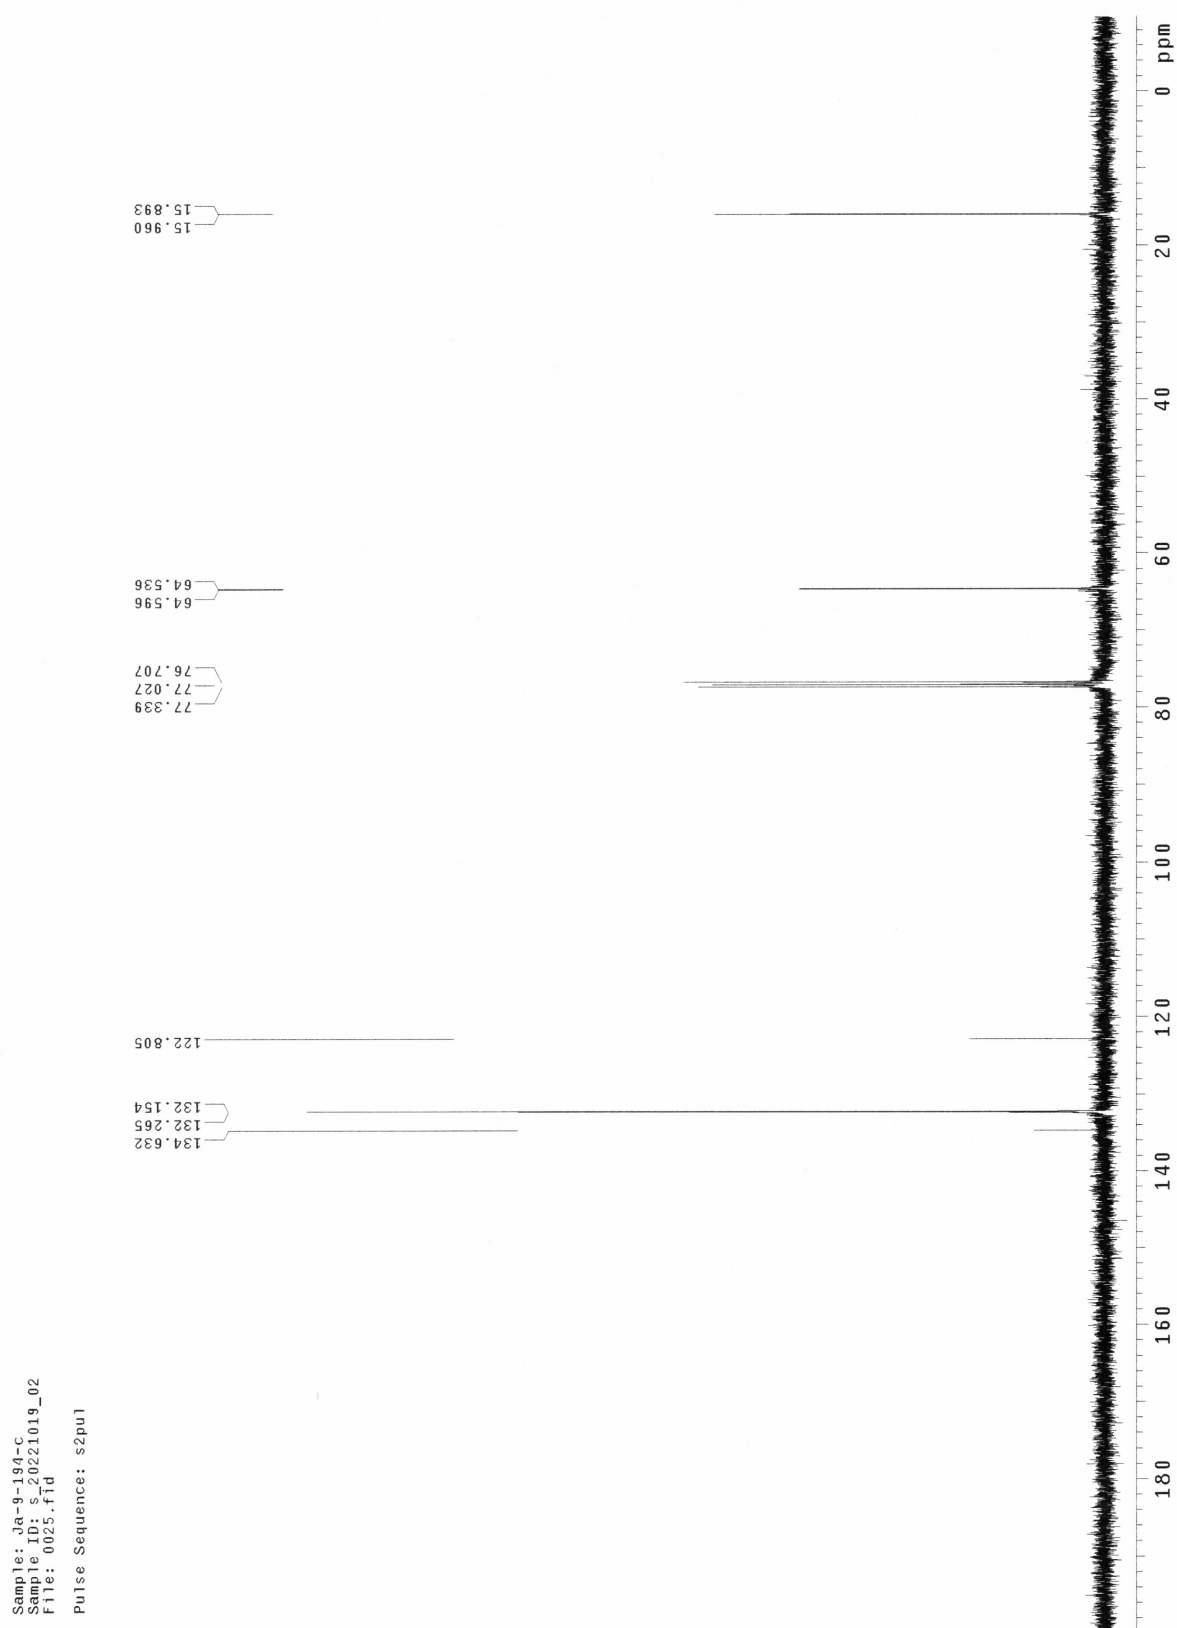



**$^{31}\text{P}$  NMR (162 MHz) in  $\text{CDCl}_3$** 

Sample: Ja-9-194-p  
File: exp

Pulse Sequence: s2pul

Solvent:  $\text{cdcl}_3$   
Temp: 25.0 C / 298.1 K  
Operator: JyKang  
VNMR-400 "Varian-NMR"

Relax. delay 1.000 sec  
Pulse 45.0 degrees  
Acq. time 1.600 sec  
Width 21166.4 Hz

10 repetitions  
OBSERVE P31, 161.7720621 MHz  
DECOUPLE H1, 399.6314735 MHz  
Power 40 dB  
continuously on  
WALTZ-16 modulated  
DATA PROCESSING  
Line broadening 1.0 Hz  
FT size 131072  
Total time 0 min, 26 sec

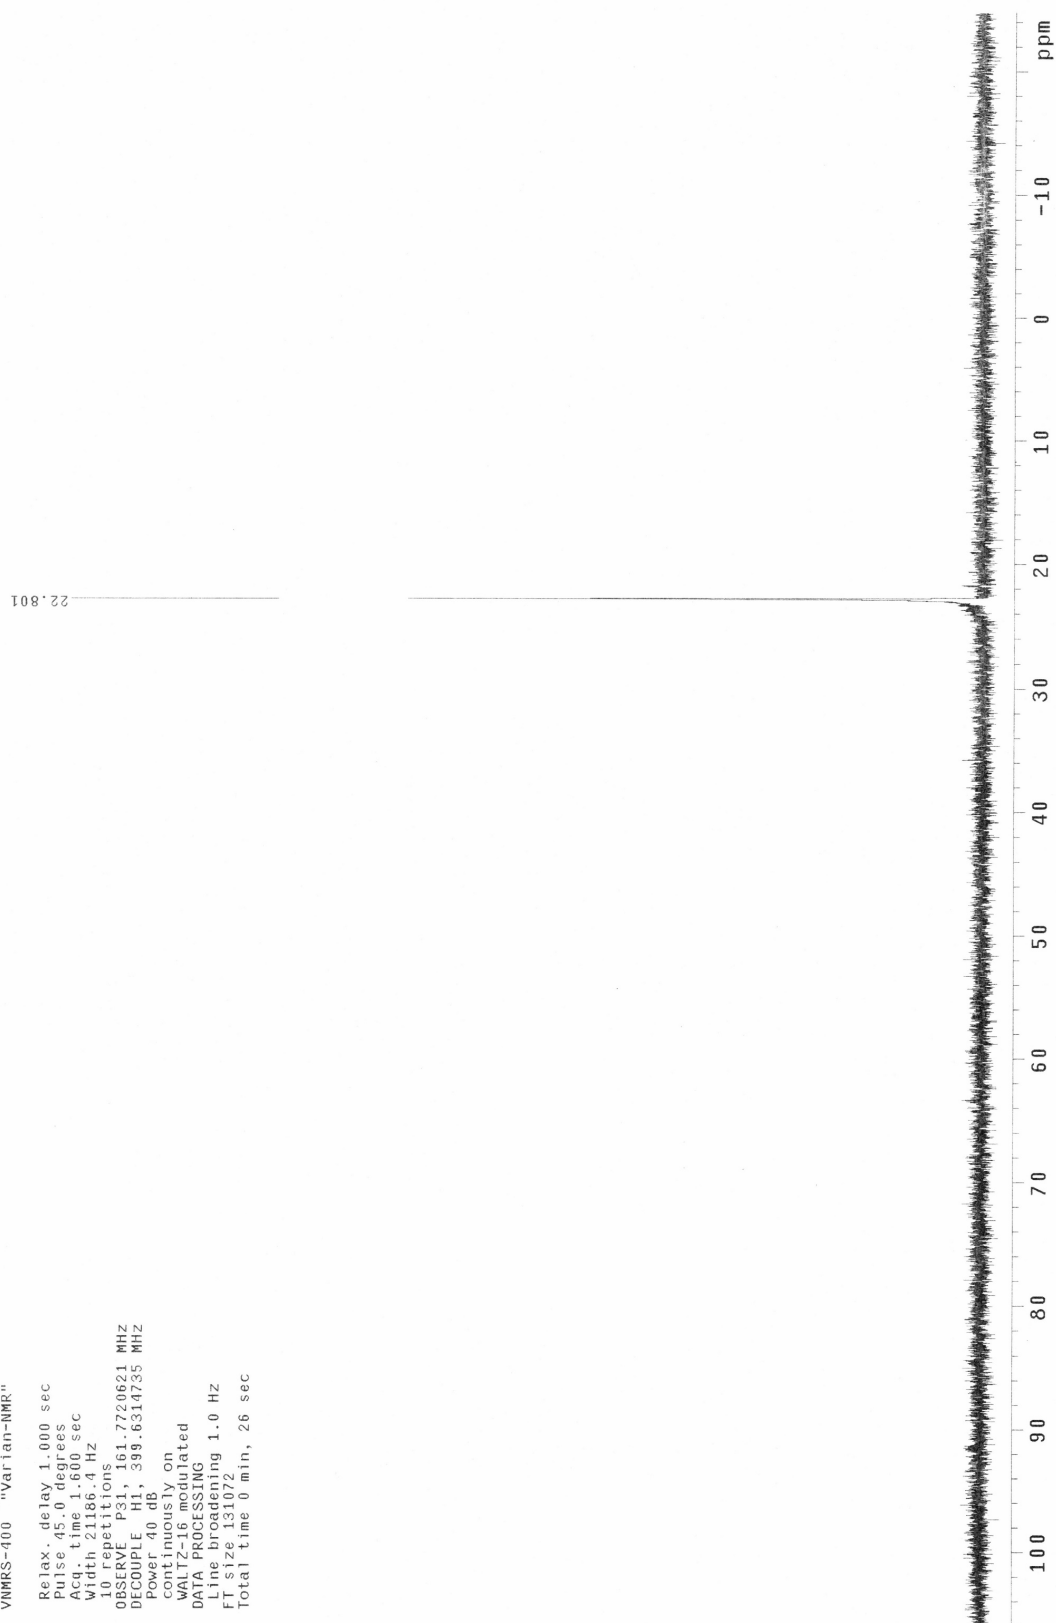



**<sup>1</sup>H NMR (400 MHz) in CDCl<sub>3</sub>**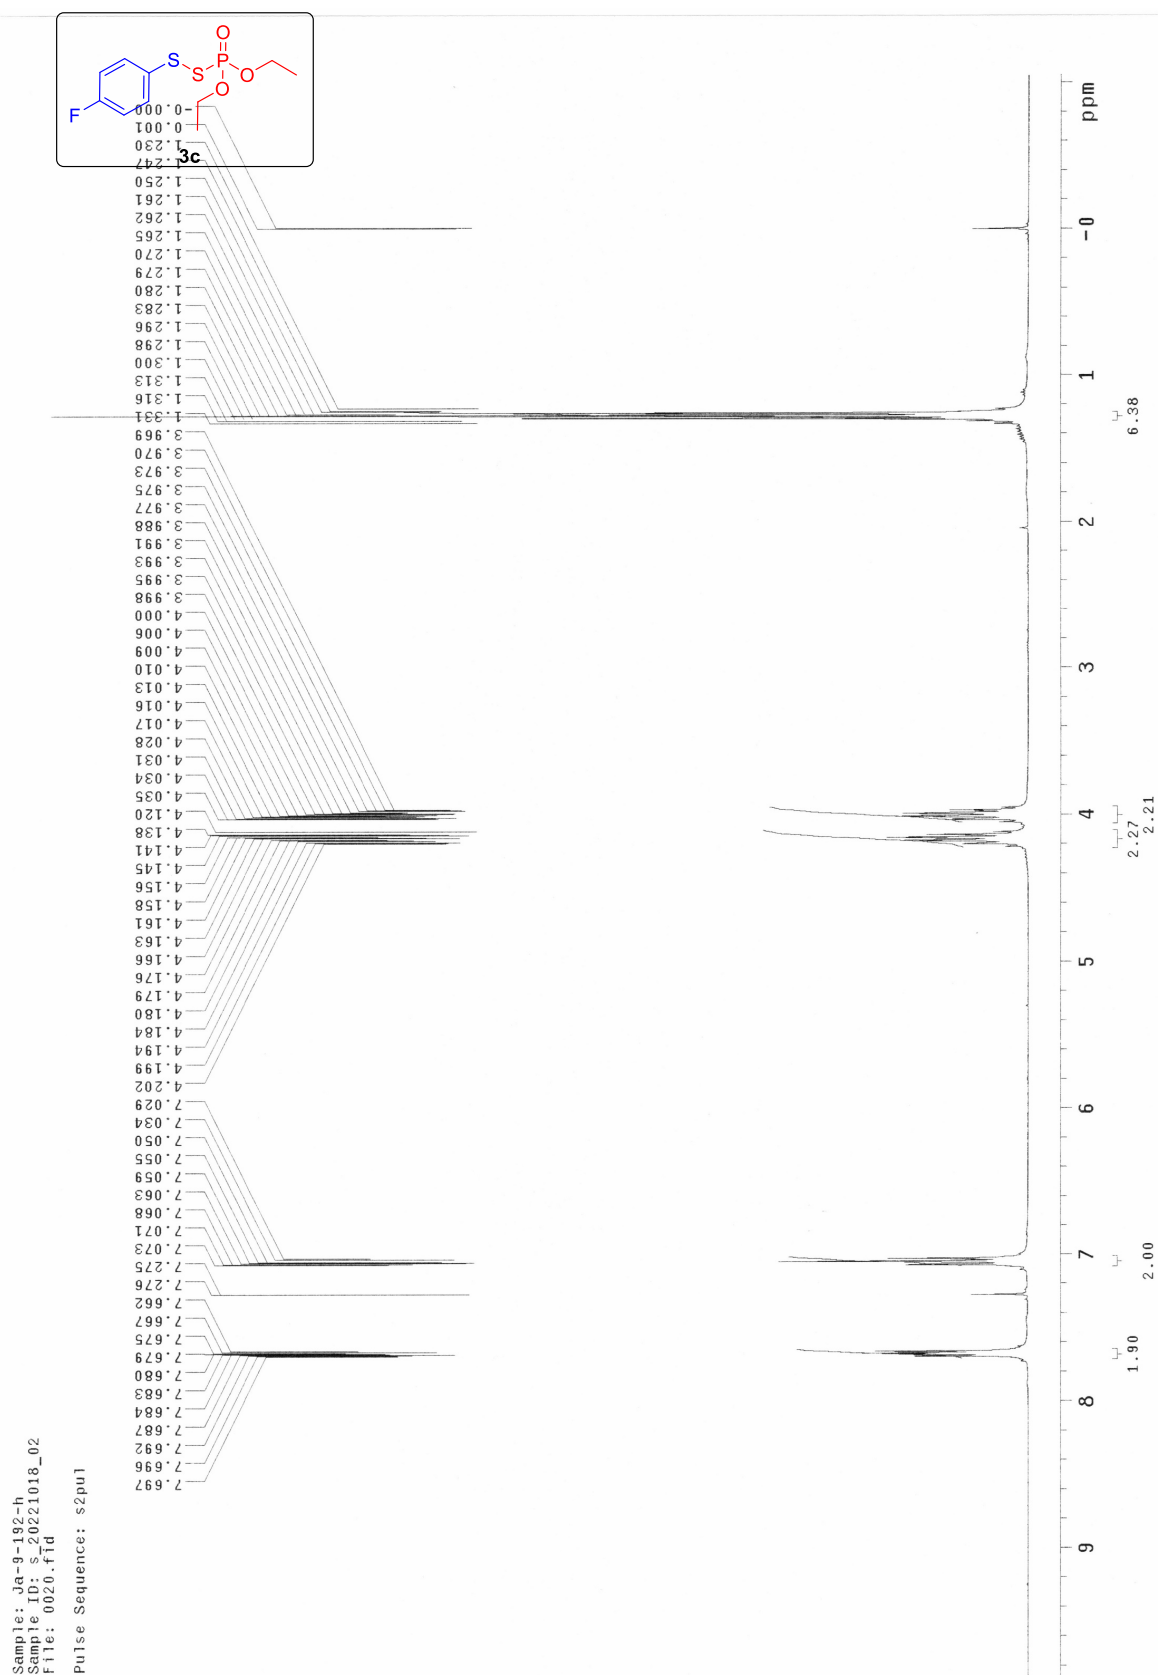



**$^{13}\text{C}$  NMR (100.5 MHz) in  $\text{CDCl}_3$** 

Sample: Ja-9-192-C  
Sample ID: s\_20221018\_03  
File: 0021.ftd  
Pulse Sequence: s2pul

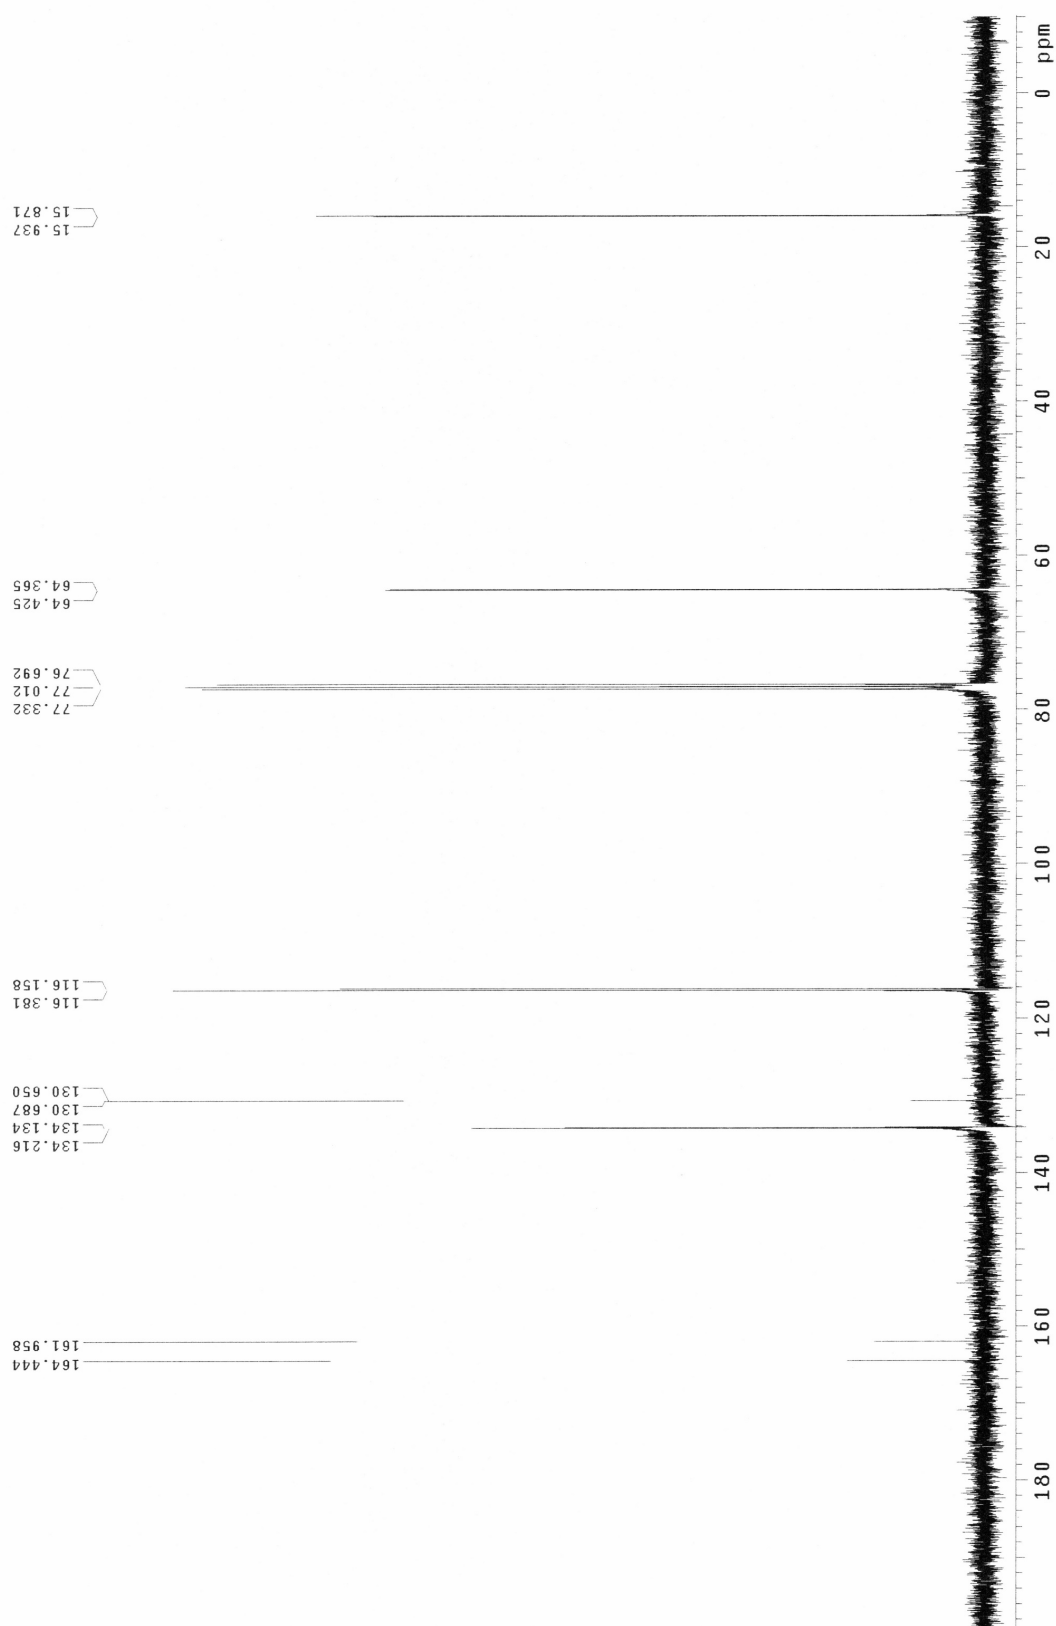



**$^{31}\text{P}$  NMR (162 MHz) in  $\text{CDCl}_3$** 

Sample: Ja-9-192-p  
File: exp

Pulse Sequence: s2pul

Solvent:  $\text{cdcl}_3$   
Temp. 25.0 C / 298.1 K  
Operator: JyKang  
VNMR-400 "Varian-NMR"

Relax. delay 1.000 sec  
Pulse 45.0 degrees  
Acq. time 1.600 sec  
Width 21186.4 Hz

10 repetitions  
OBSERVE P31, 161.7720621 MHz  
DECOUPLE H1, 399.6314735 MHz  
Power 40 dB  
continuously on  
WALTZ-16 modulated  
DATA PROCESSING  
Line broadening 1.0 Hz  
FT size 131072  
Total time 0 min, 26 sec

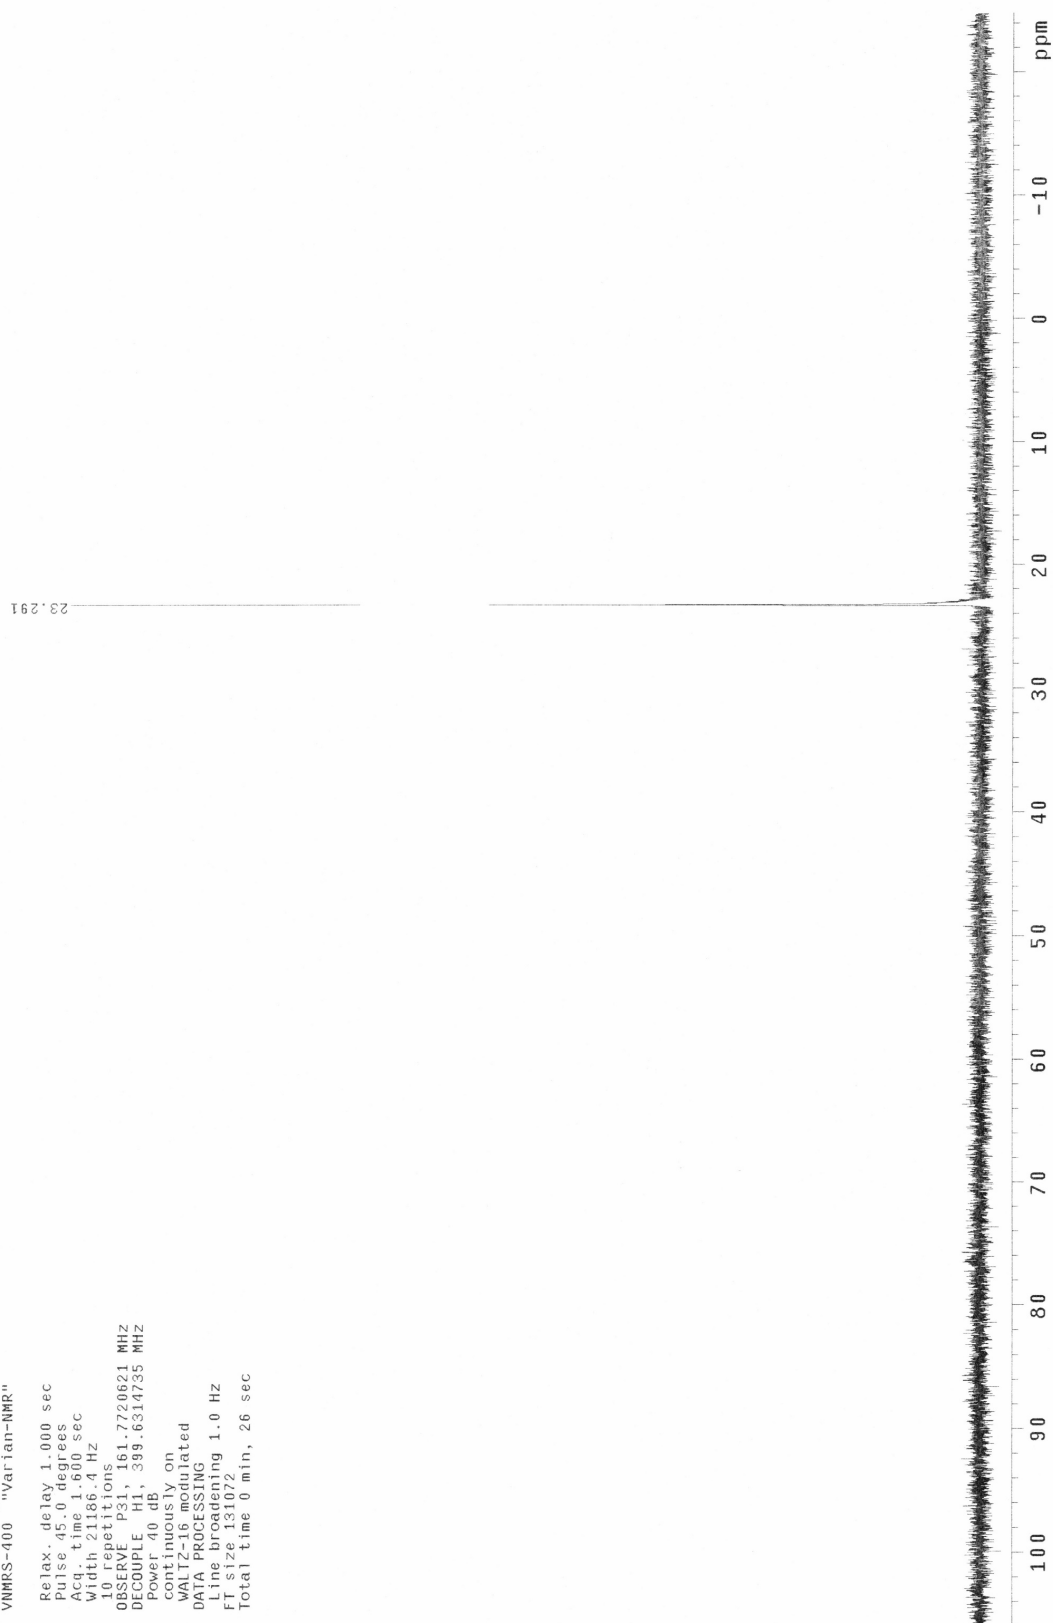



**<sup>1</sup>H NMR (400 MHz) in CDCl<sub>3</sub>**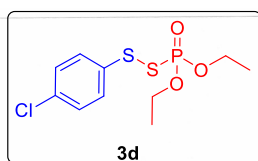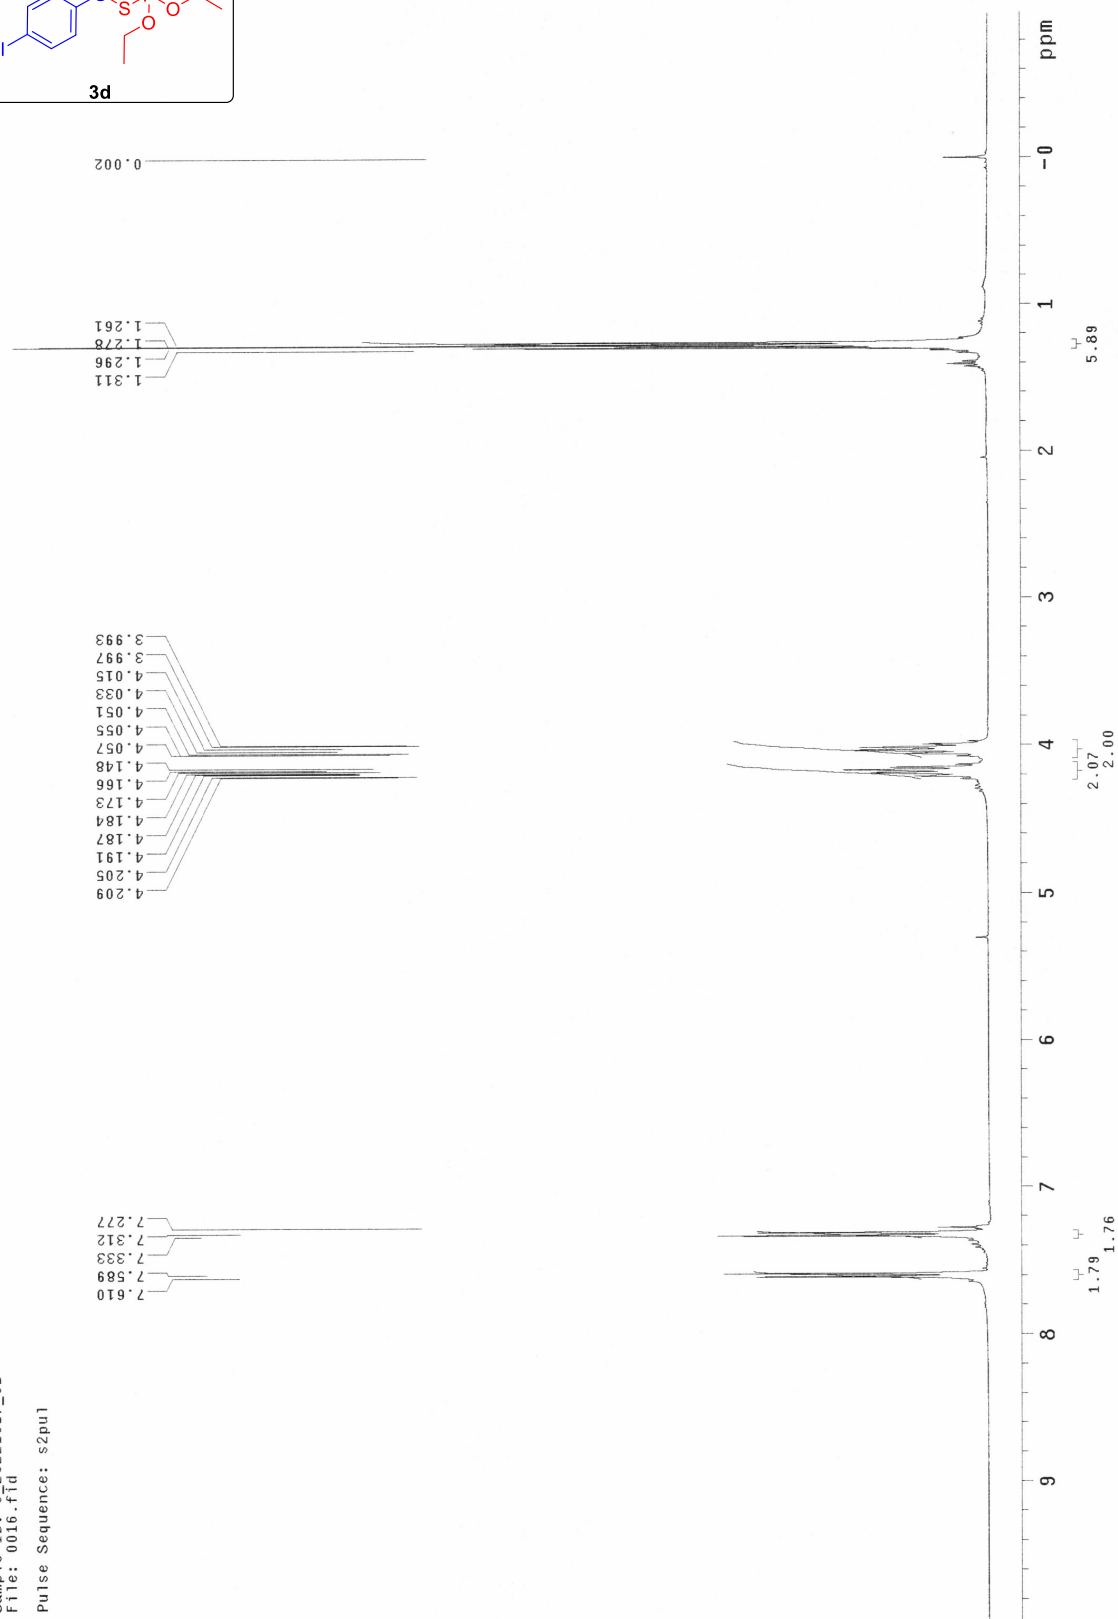



**$^{13}\text{C}$  NMR (100.5 MHz) in  $\text{CDCl}_3$** 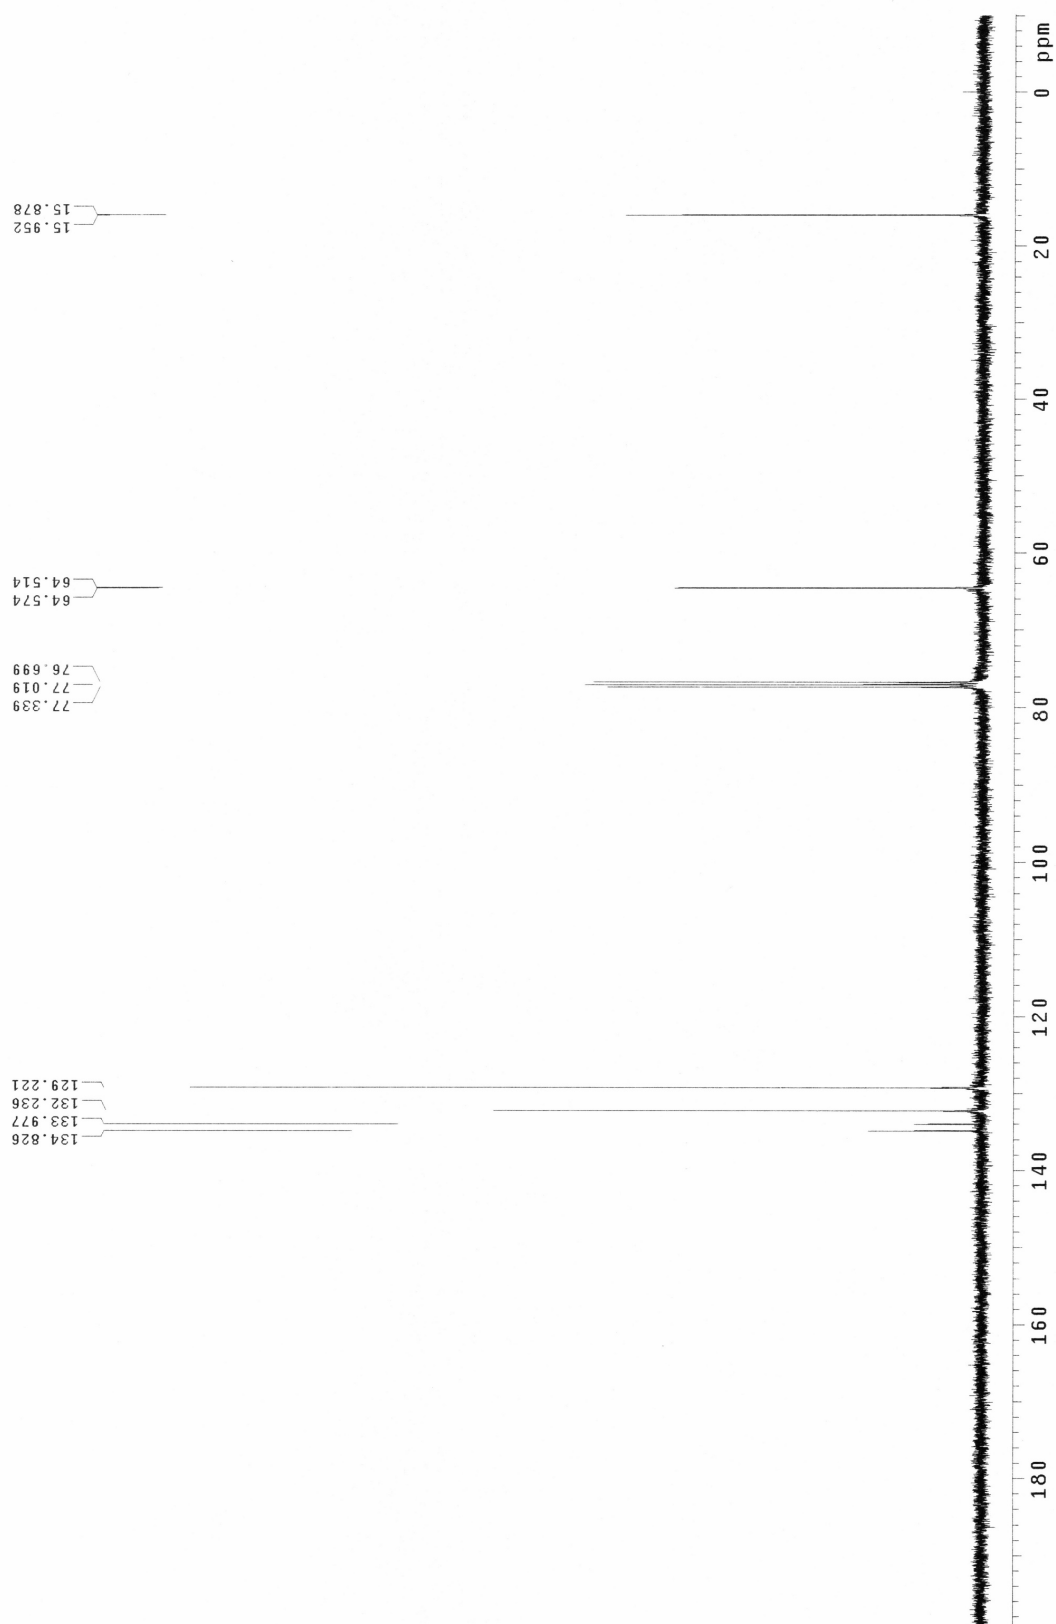

Sample: Ja-9-187-c  
Sample ID: s\_20221017\_02  
File: 0017.fid  
Pulse Sequence: szpu1



**$^{31}\text{P}$  NMR (162 MHz) in  $\text{CDCl}_3$** 

Sample: Ja-9-187-p  
File: exp  
Pulse Sequence: s2pul  
Solvent: cdcl3  
Temp: 25.0 C / 298.1 K  
Operator: Jykang  
VNMR-400 "Varian-NMR"  
Relax. delay 1.000 sec  
Pulse 45.0 degrees  
Acq. time 1.600 sec  
Width 21186.4 Hz  
10 repetitions  
OBSERVE P31, 161.7720621 MHz  
DECOUPLE H1, 399.6314735 MHz  
Power 40 dB  
continuously on  
WALTZ-16 modulated  
DATA PROCESSING  
Line broadening 1.0 Hz  
FT size 131072  
Total time 0 min, 26 sec

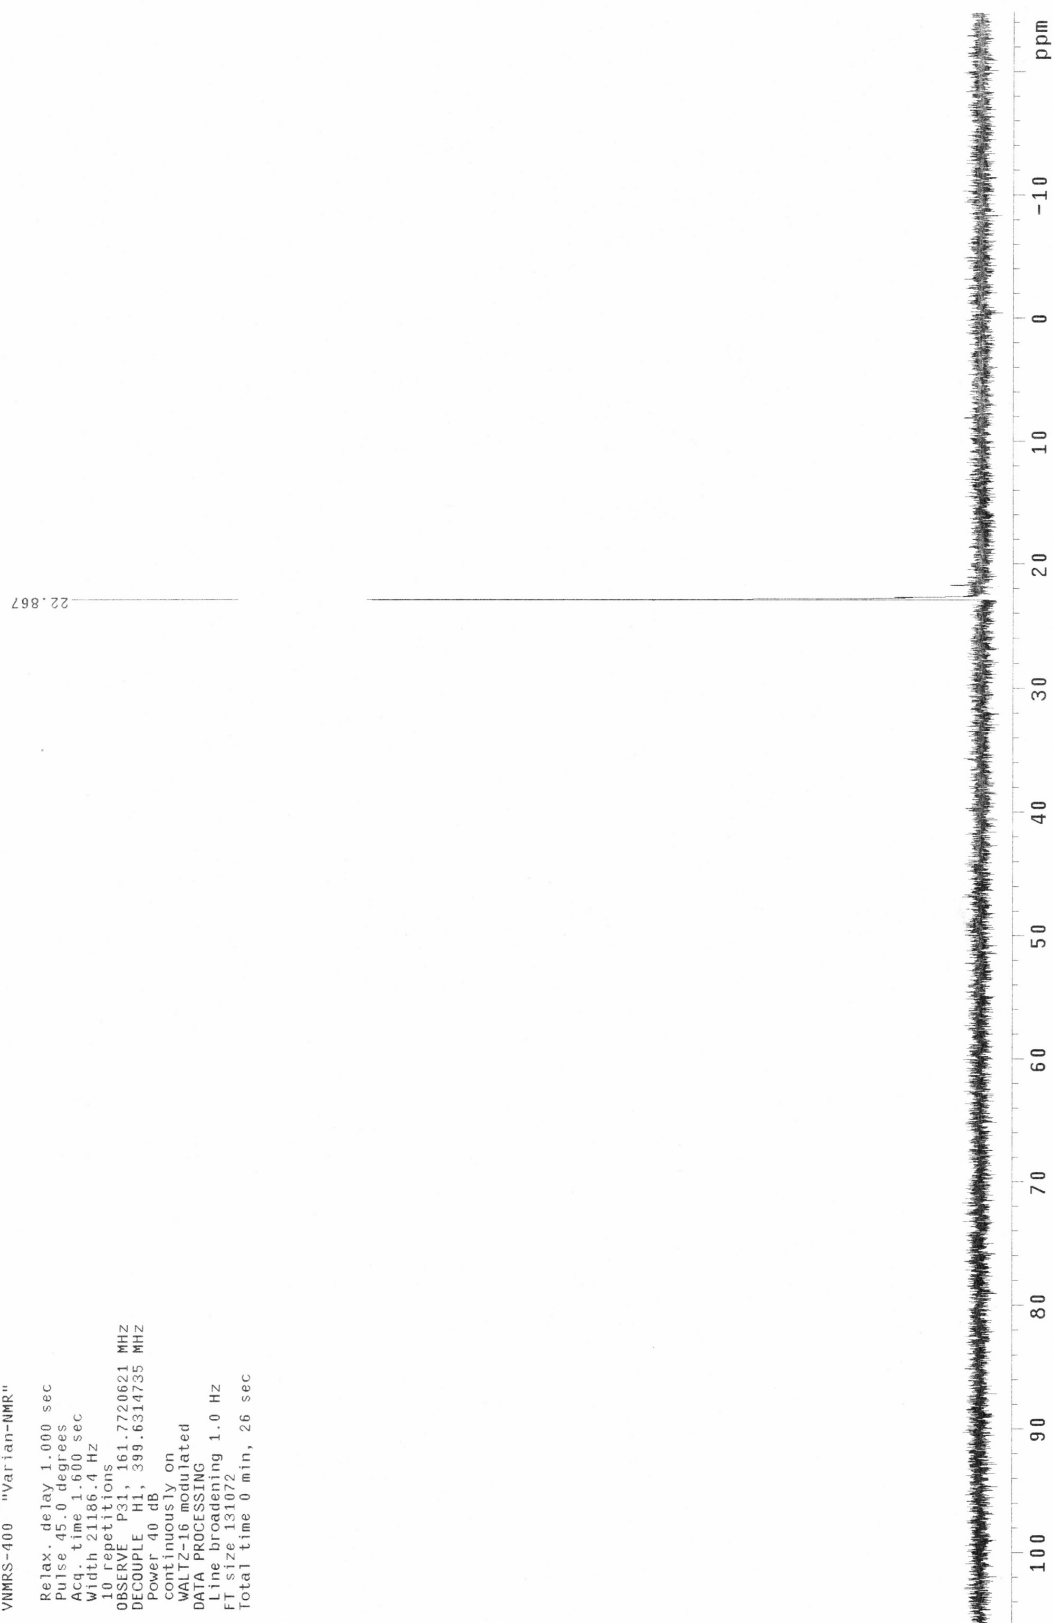



**<sup>1</sup>H NMR (400 MHz) in CDCl<sub>3</sub>**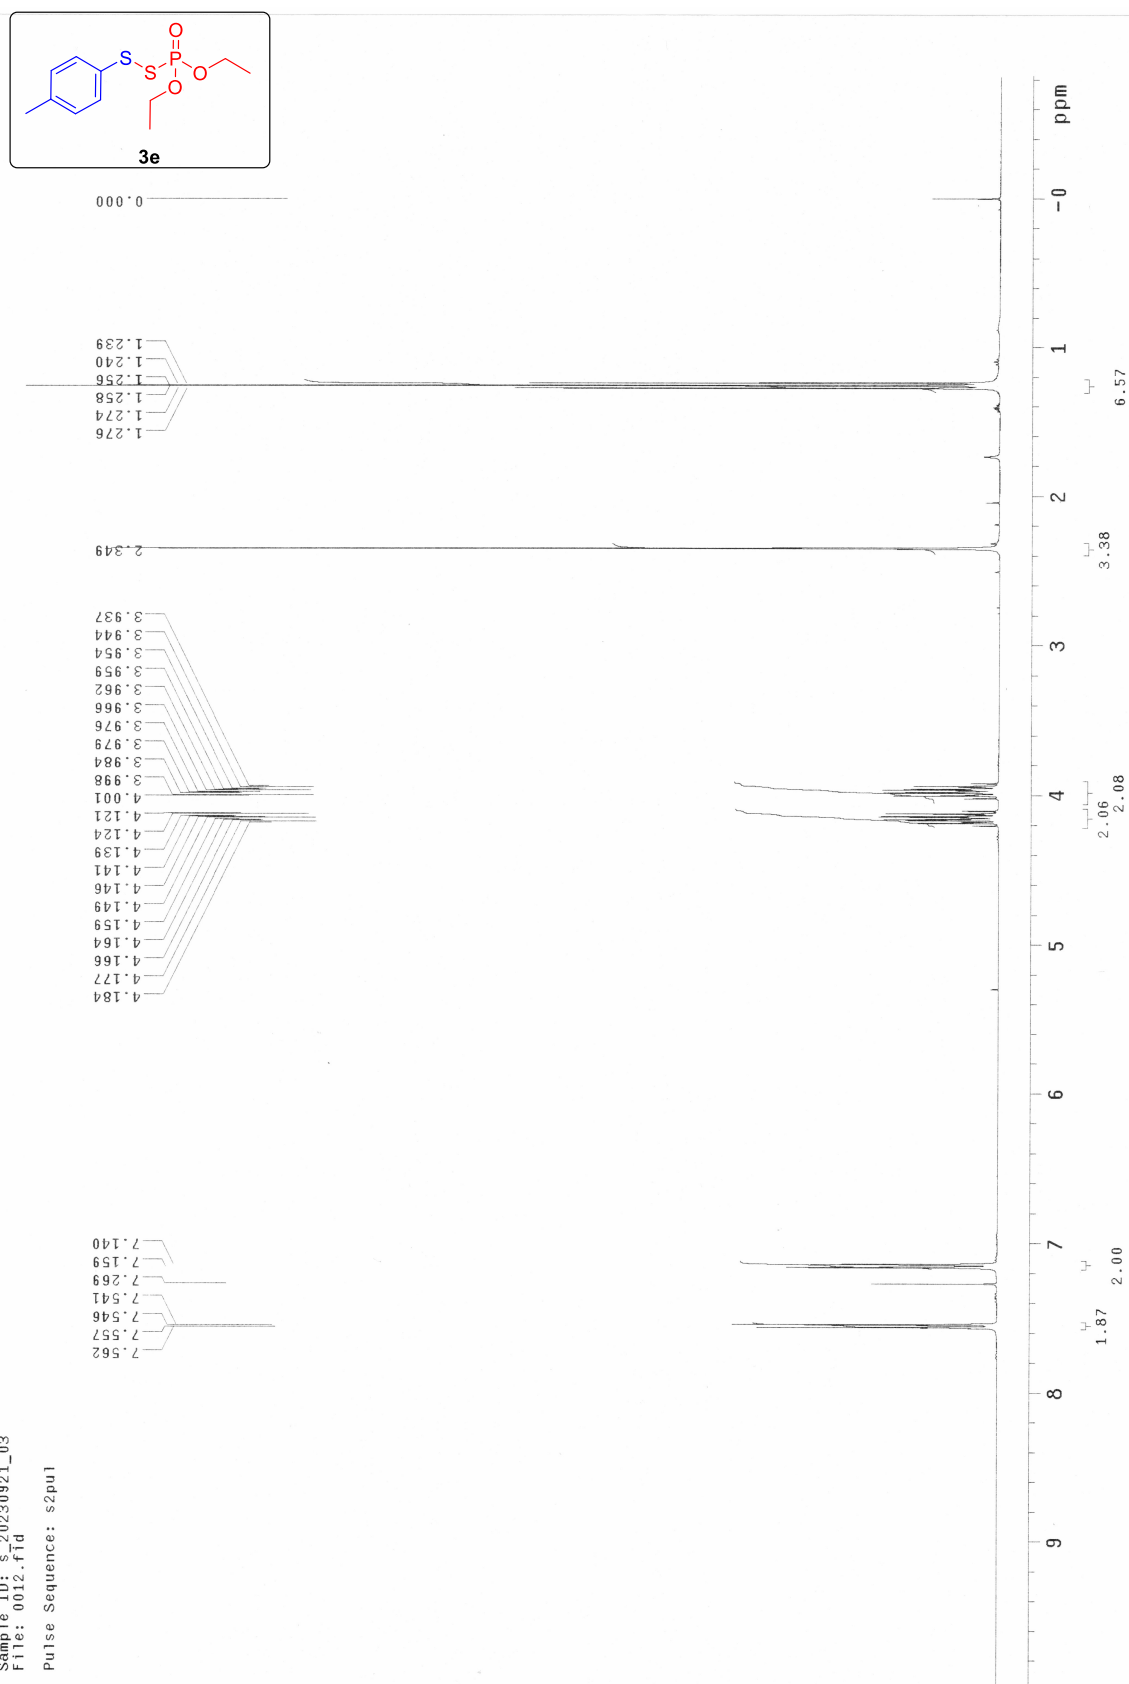



**$^{13}\text{C}$  NMR (100.5 MHz) in  $\text{CDCl}_3$** 

Sample: Ja-9-101-C  
Sample ID: S\_20230921\_04  
File: 0013.FID  
Pulse Sequence: s2pul

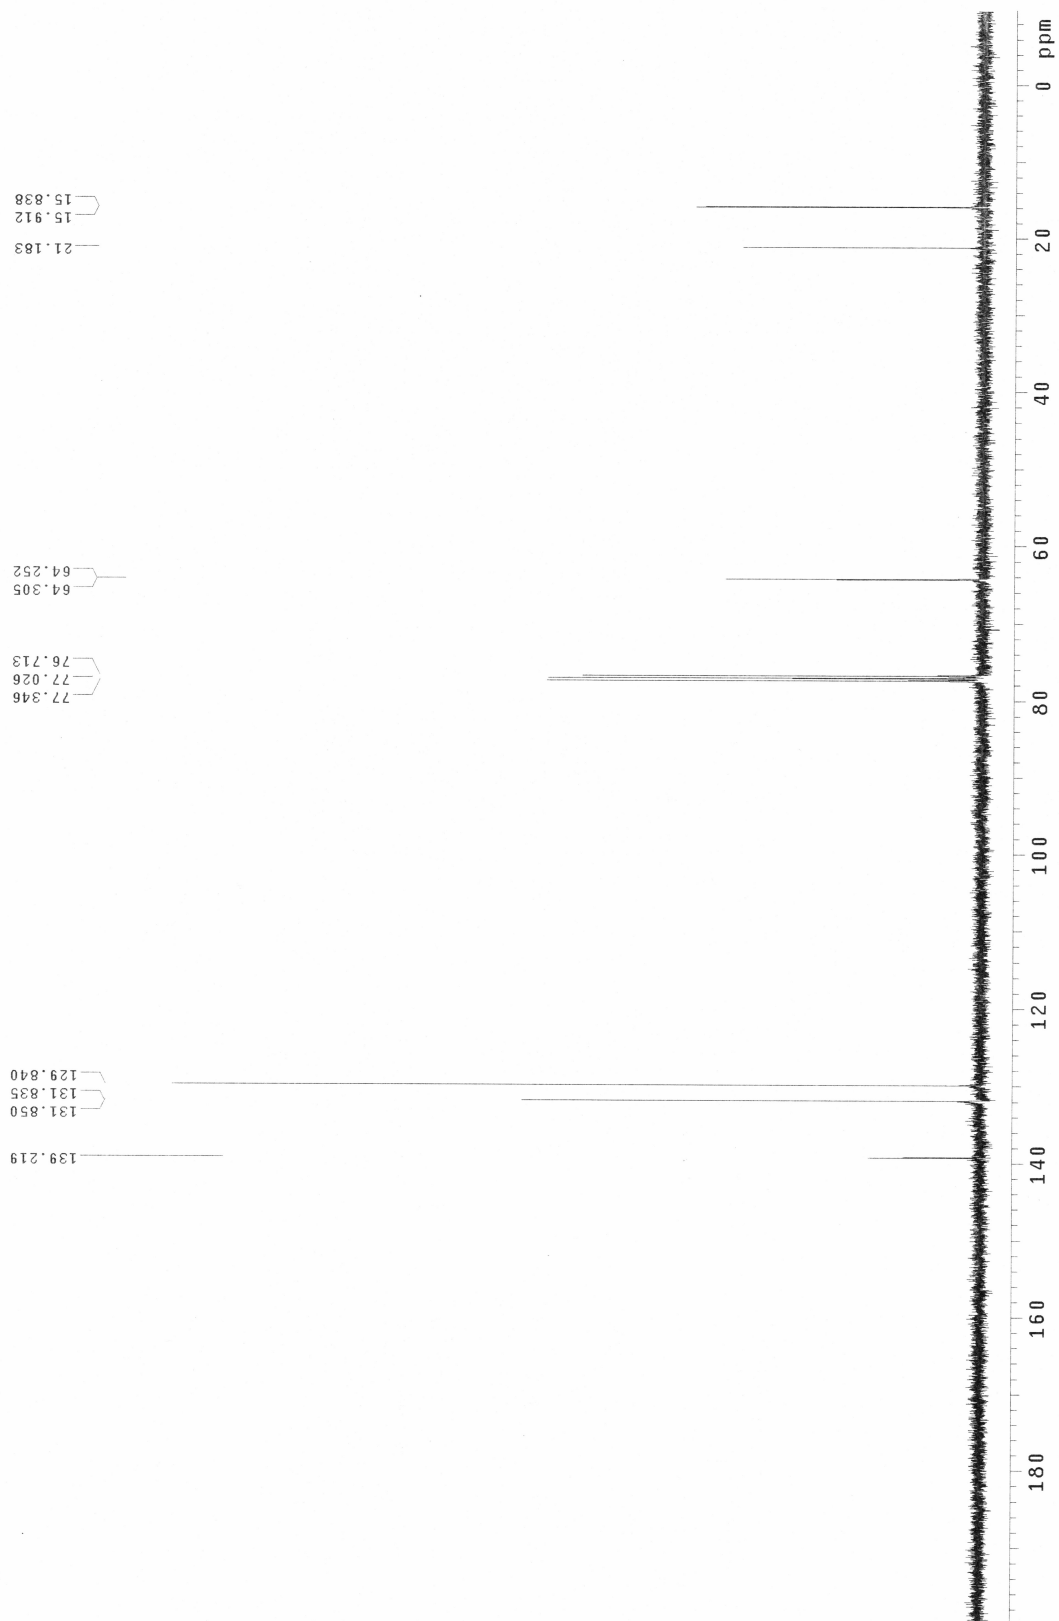



**$^{31}\text{P}$  NMR (162 MHz) in  $\text{CDCl}_3$** 

Sample: Ja-9-191-p  
File: exp  
Pulse Sequence: s2pul  
Solvent: cdcl3  
Temp: 25.0 C, 298.1 K  
Operator: J/Kang  
VNMR-400 "Varian-NMR"  
Relax. delay 1.000 sec  
Pulse 45.0 degrees  
Acq. time 1.600 sec  
Width 21186.4 Hz  
10 repetitions  
OBSERVE P31, 161.7720621 MHz  
DECOUPLE H1, 399.6314735 MHz  
Power 40 dB  
continuously on  
Z-axis modulated  
DATA PROCESSING  
File header adding 1.0 Hz  
FT size 131072  
Total time 0 min, 26 sec

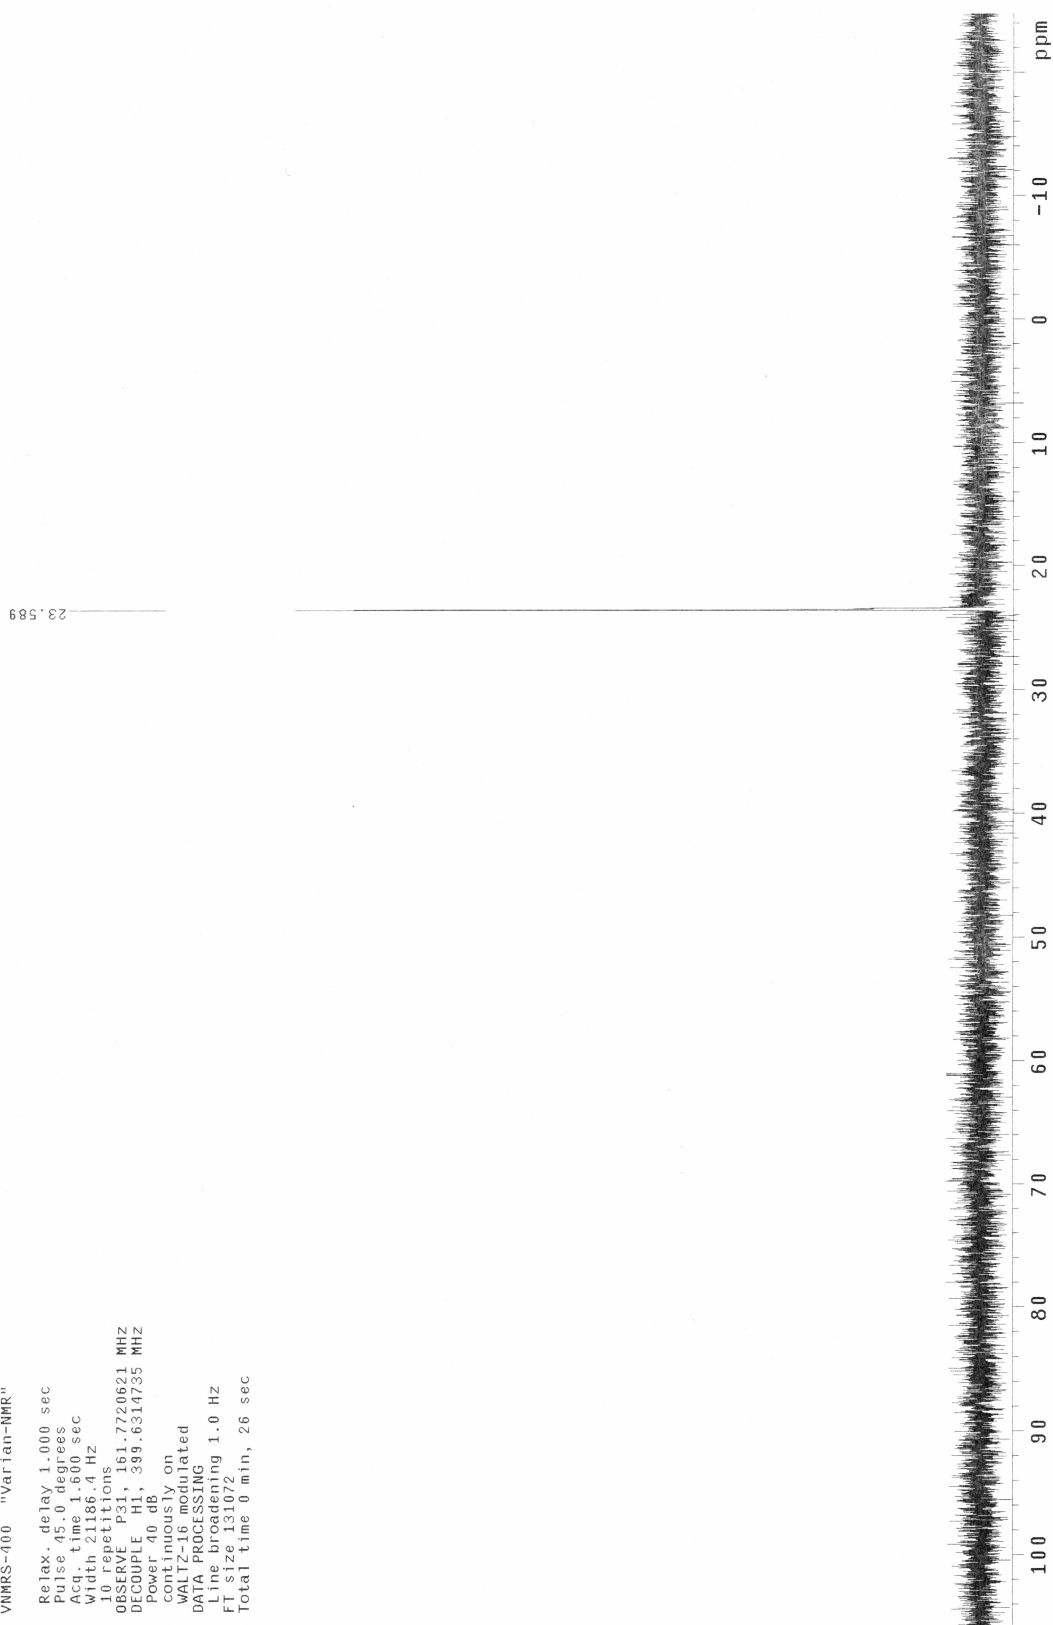



**<sup>1</sup>H NMR (400 MHz) in CDCl<sub>3</sub>**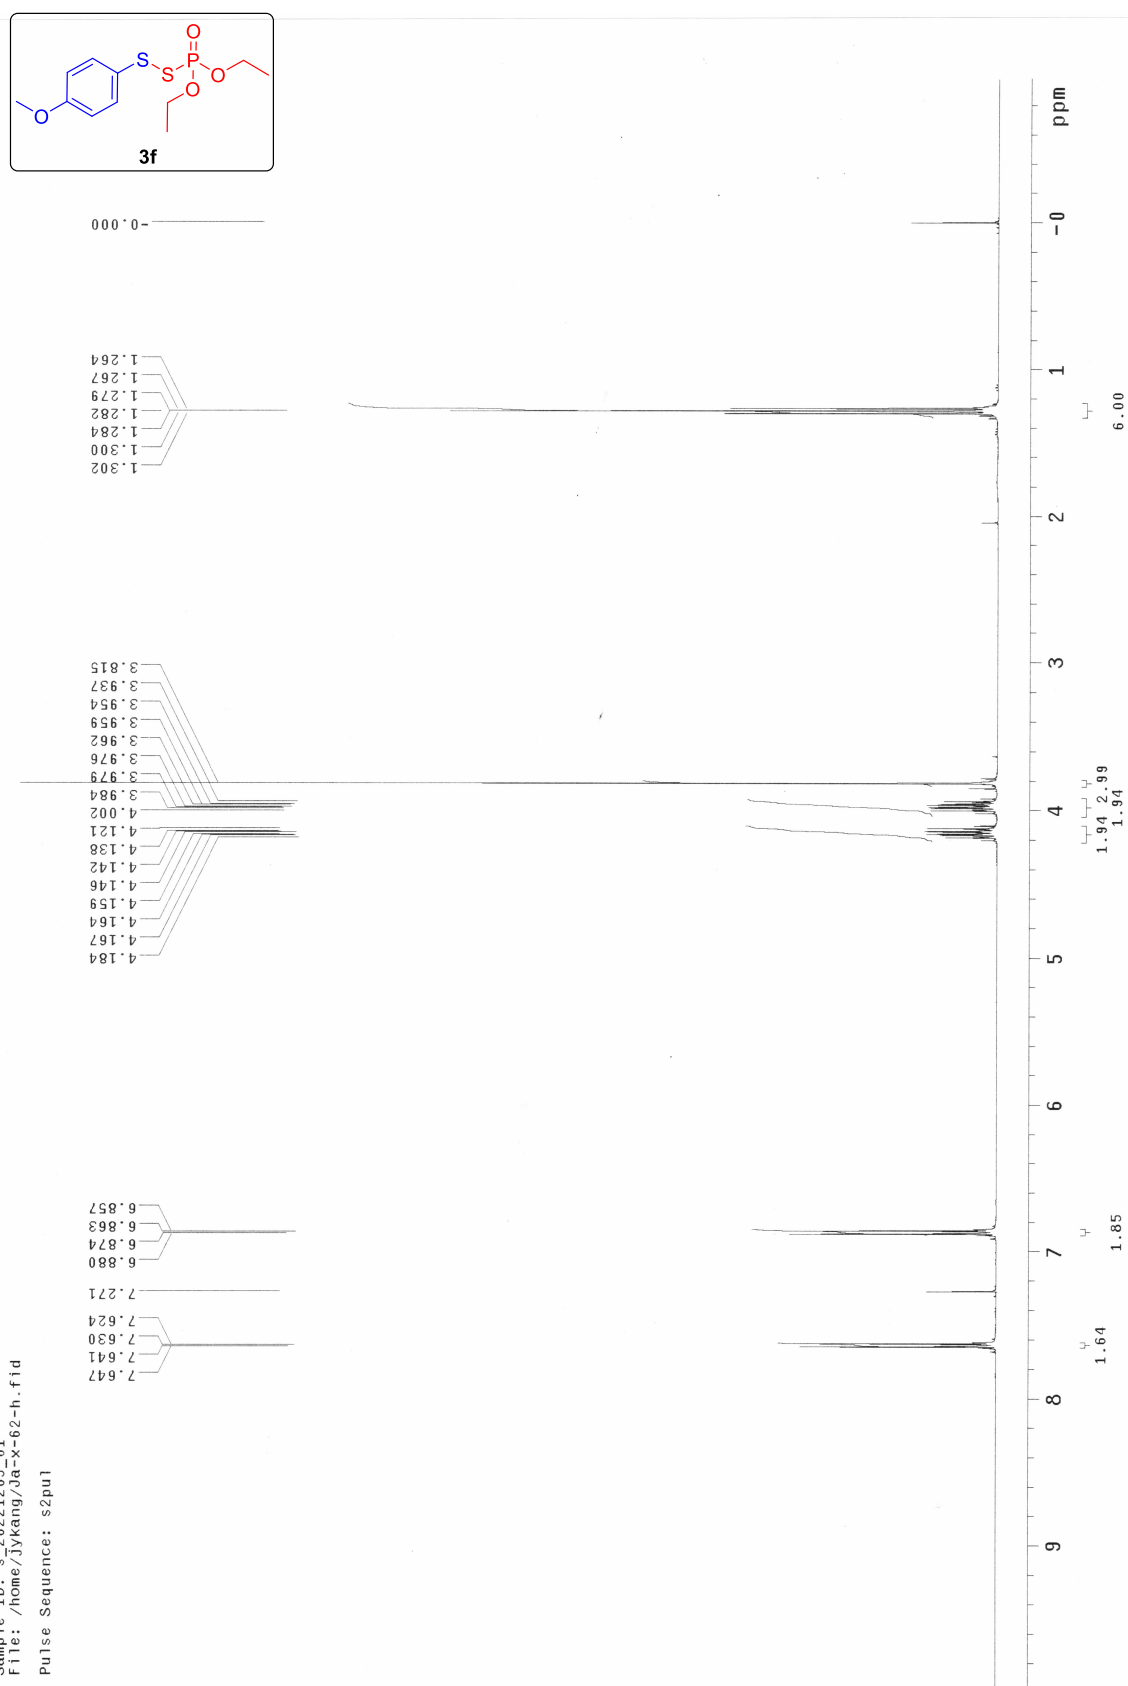



$^{13}\text{C}$  NMR (100.5 MHz) in  $\text{CDCl}_3$ 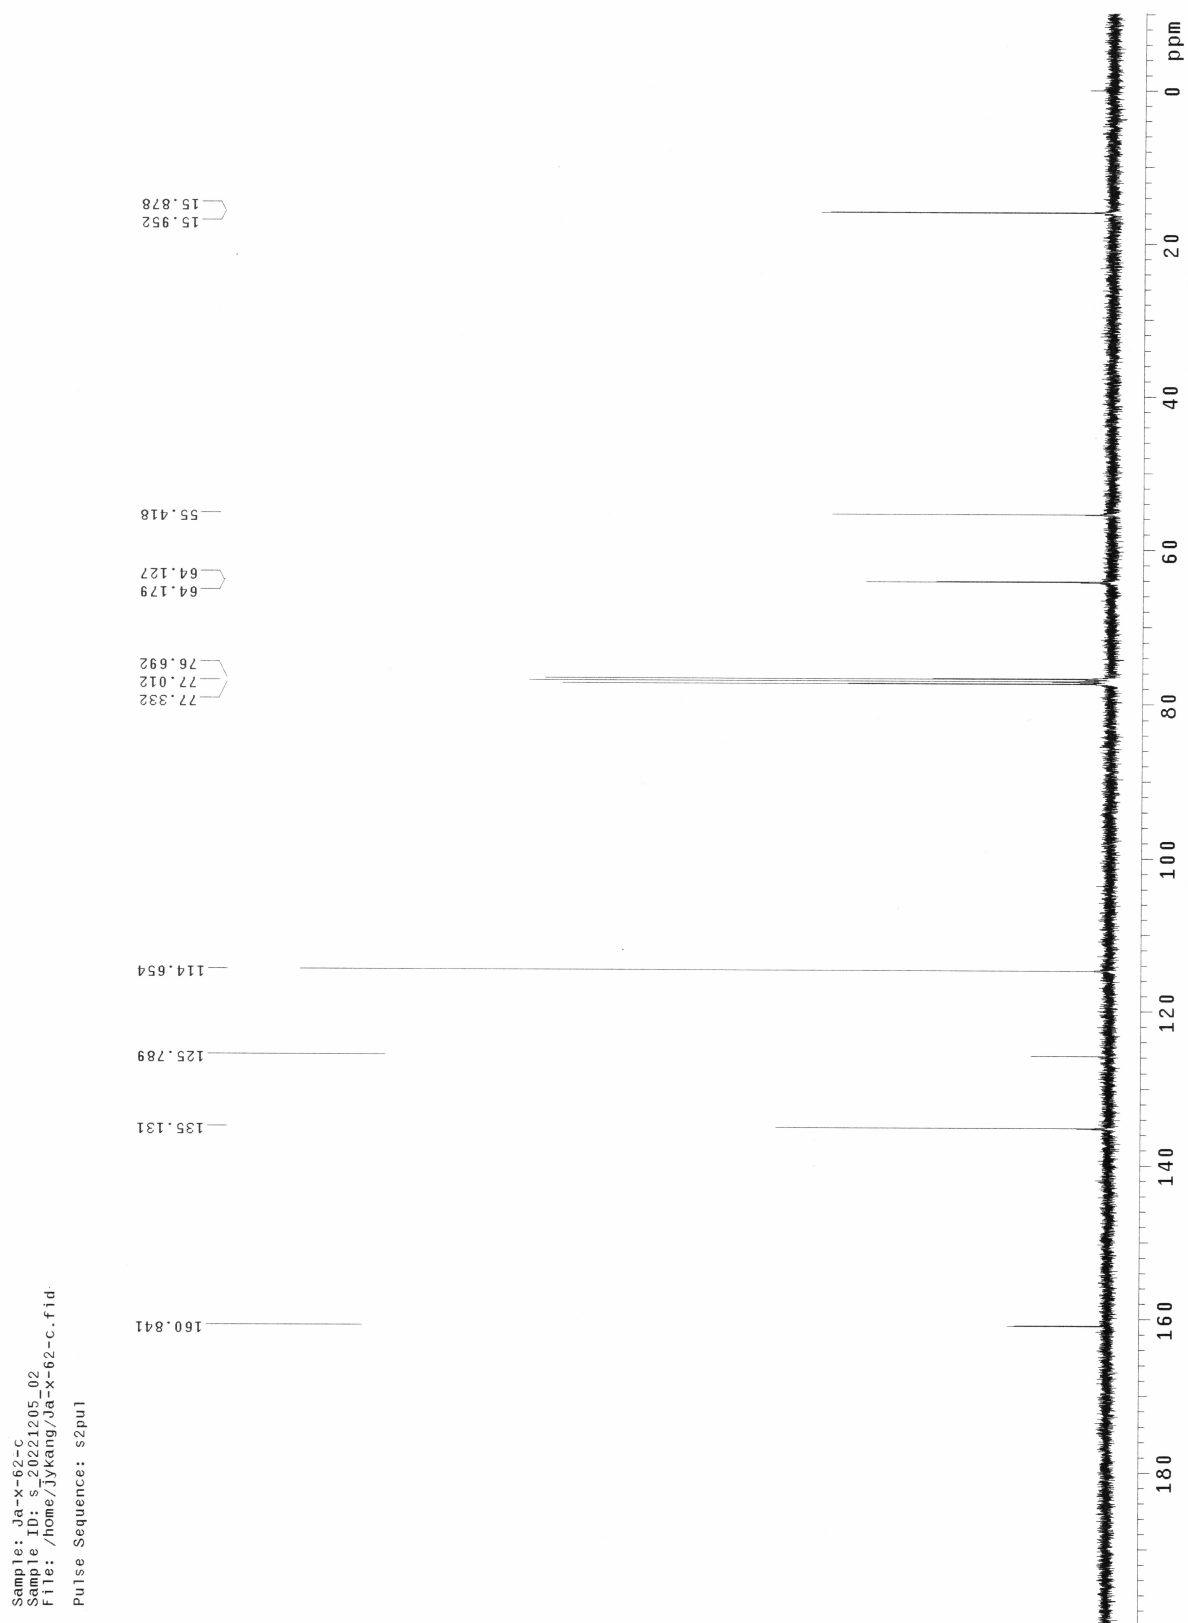



**$^{31}\text{P}$  NMR (162 MHz) in  $\text{CDCl}_3$** 

Sample: ja-x-62-p  
File: exp  
Pulse Sequence: s2pul  
Solvent: cd3od  
Temp. 25.0 C / 298.1 K  
Operator: Jykang  
VNMR-400 "Varian-NMR"  
Relax. delay 1.000 sec  
Pulse 45.0 degrees  
Acq. time 1.600 sec  
Width 21186.4 Hz  
10 repetitions  
OBSERVE P31, 161.7710681 MHz  
DECOUPLE H1, 399.6200193 MHz  
Power 40 dB  
continuously on  
WALTZ-16 modulated  
DATA PROCESSING  
Line broadening 1.0 Hz  
FT size 131072  
Total time 0 min, 26 sec

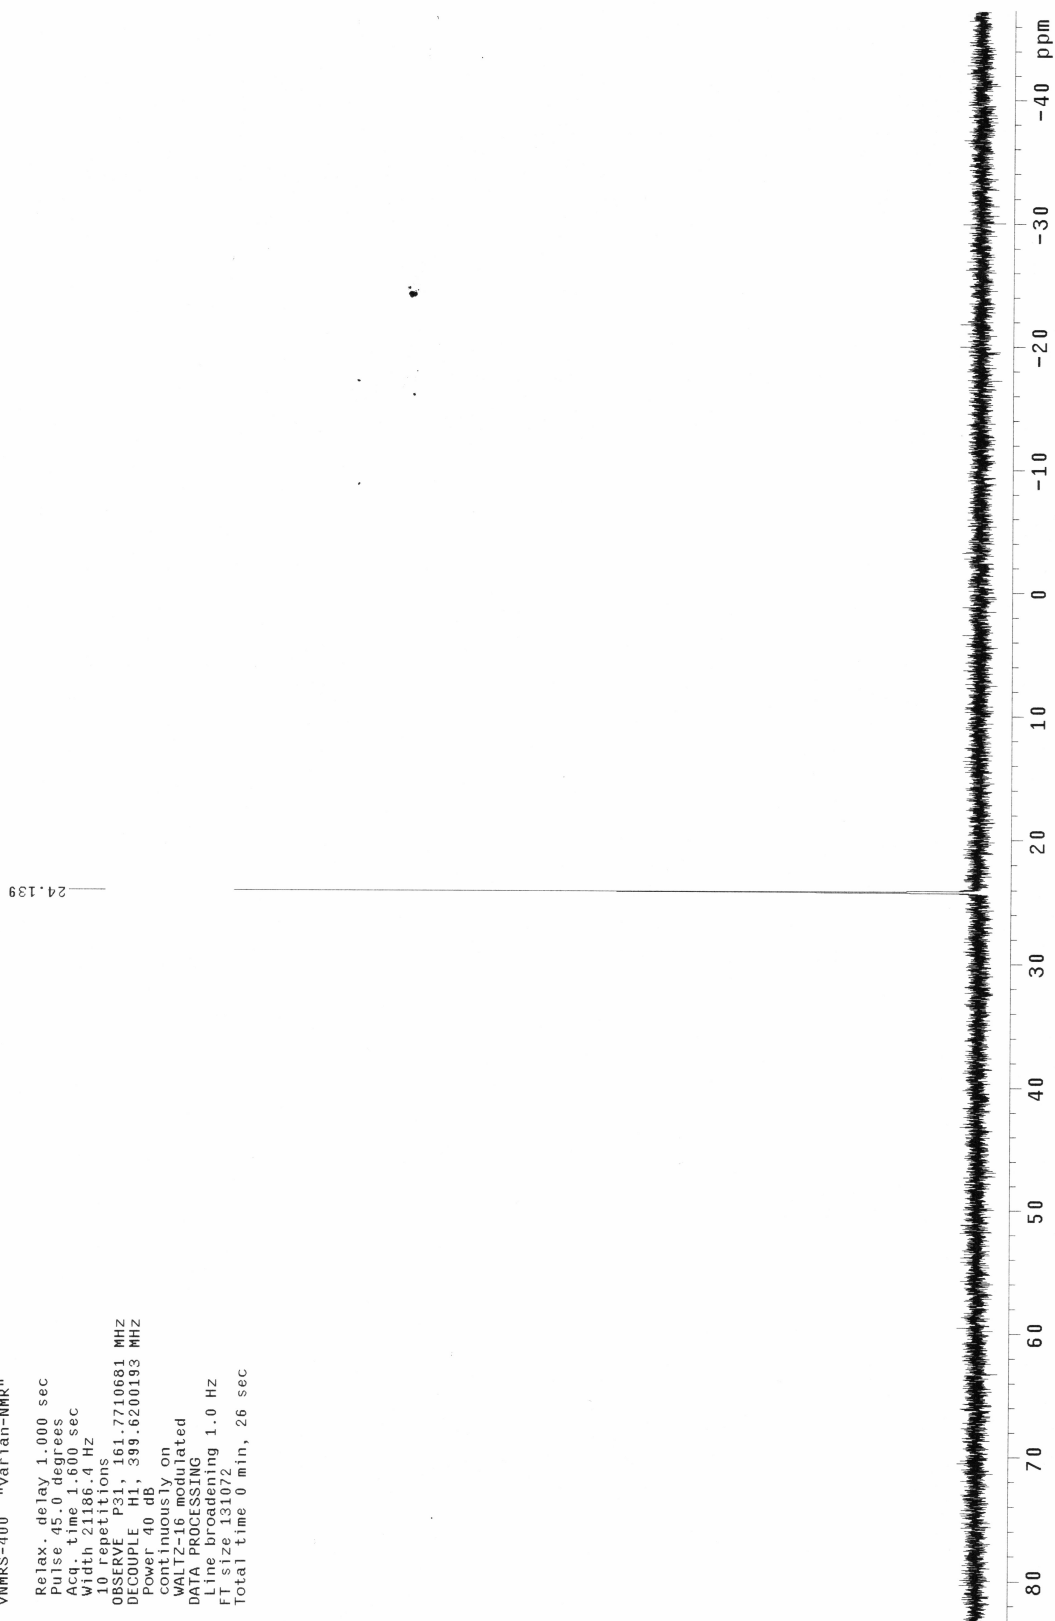



$^1\text{H}$  NMR (400 MHz) in  $\text{CDCl}_3$ 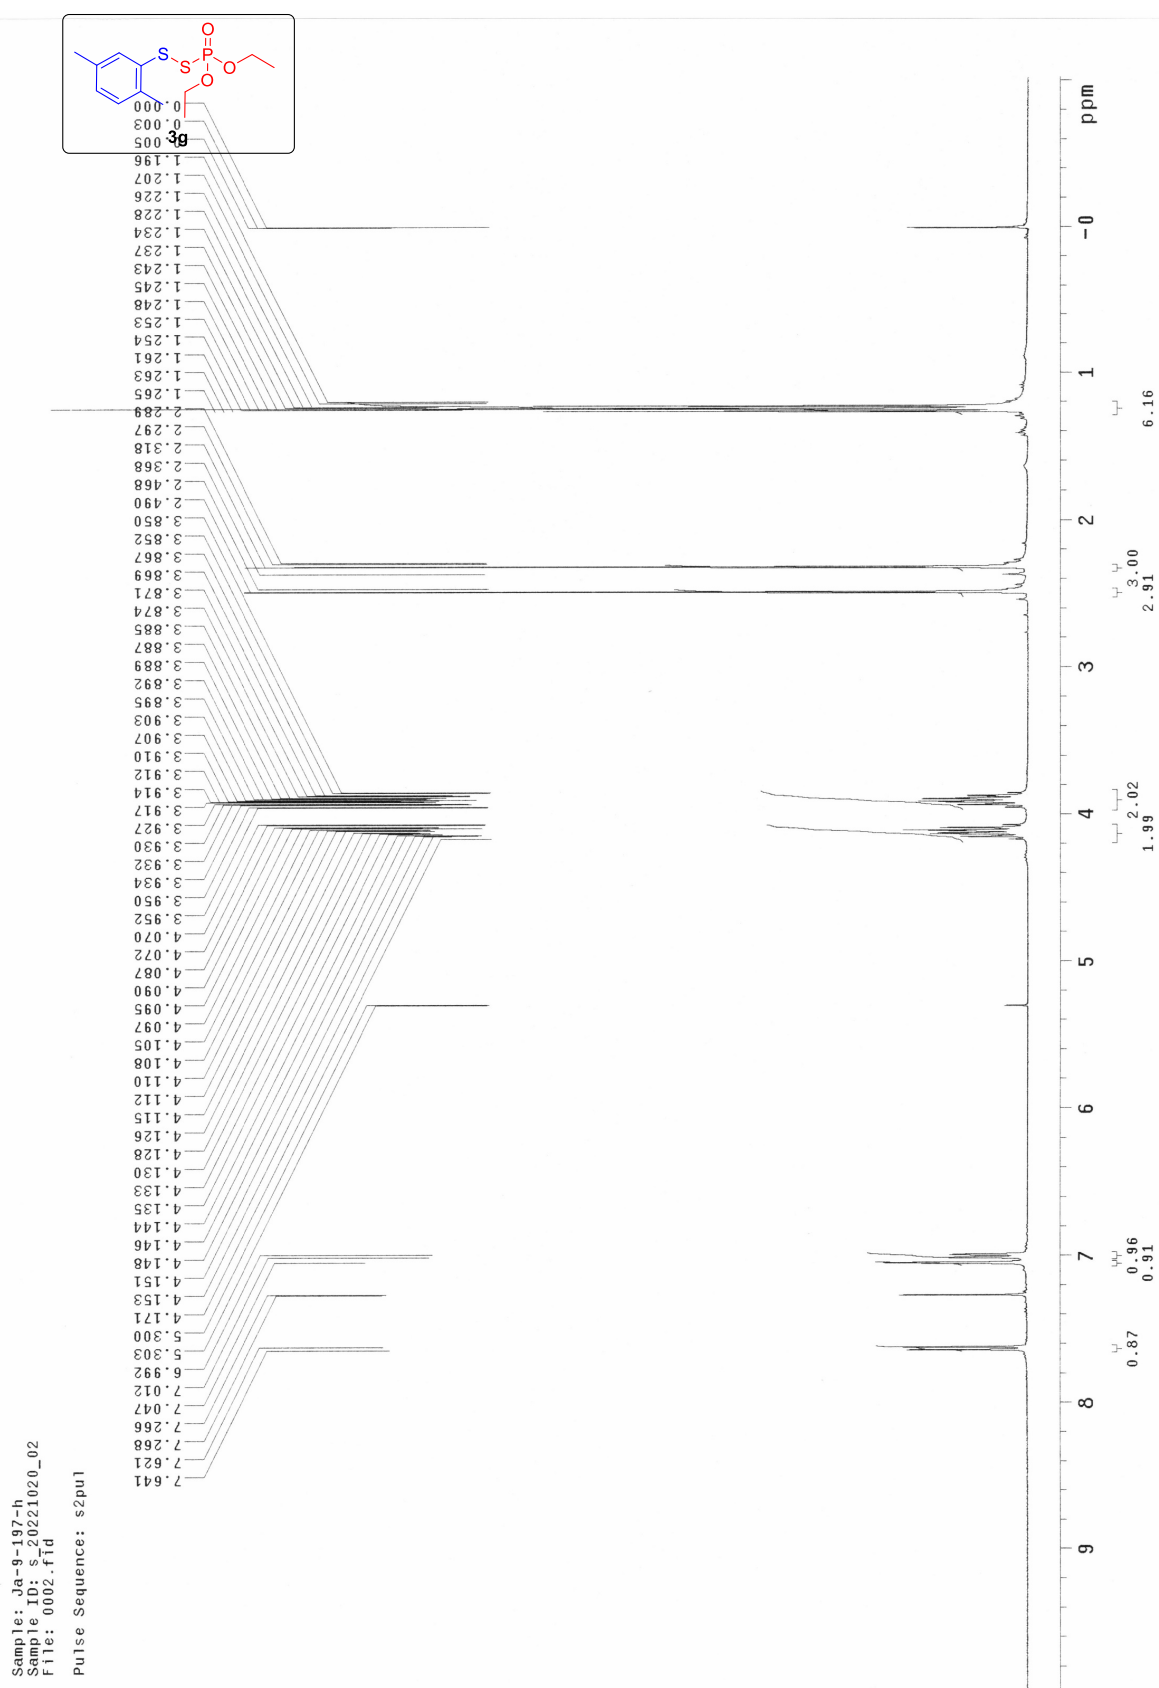



**$^{13}\text{C}$  NMR (100.5 MHz) in  $\text{CDCl}_3$** 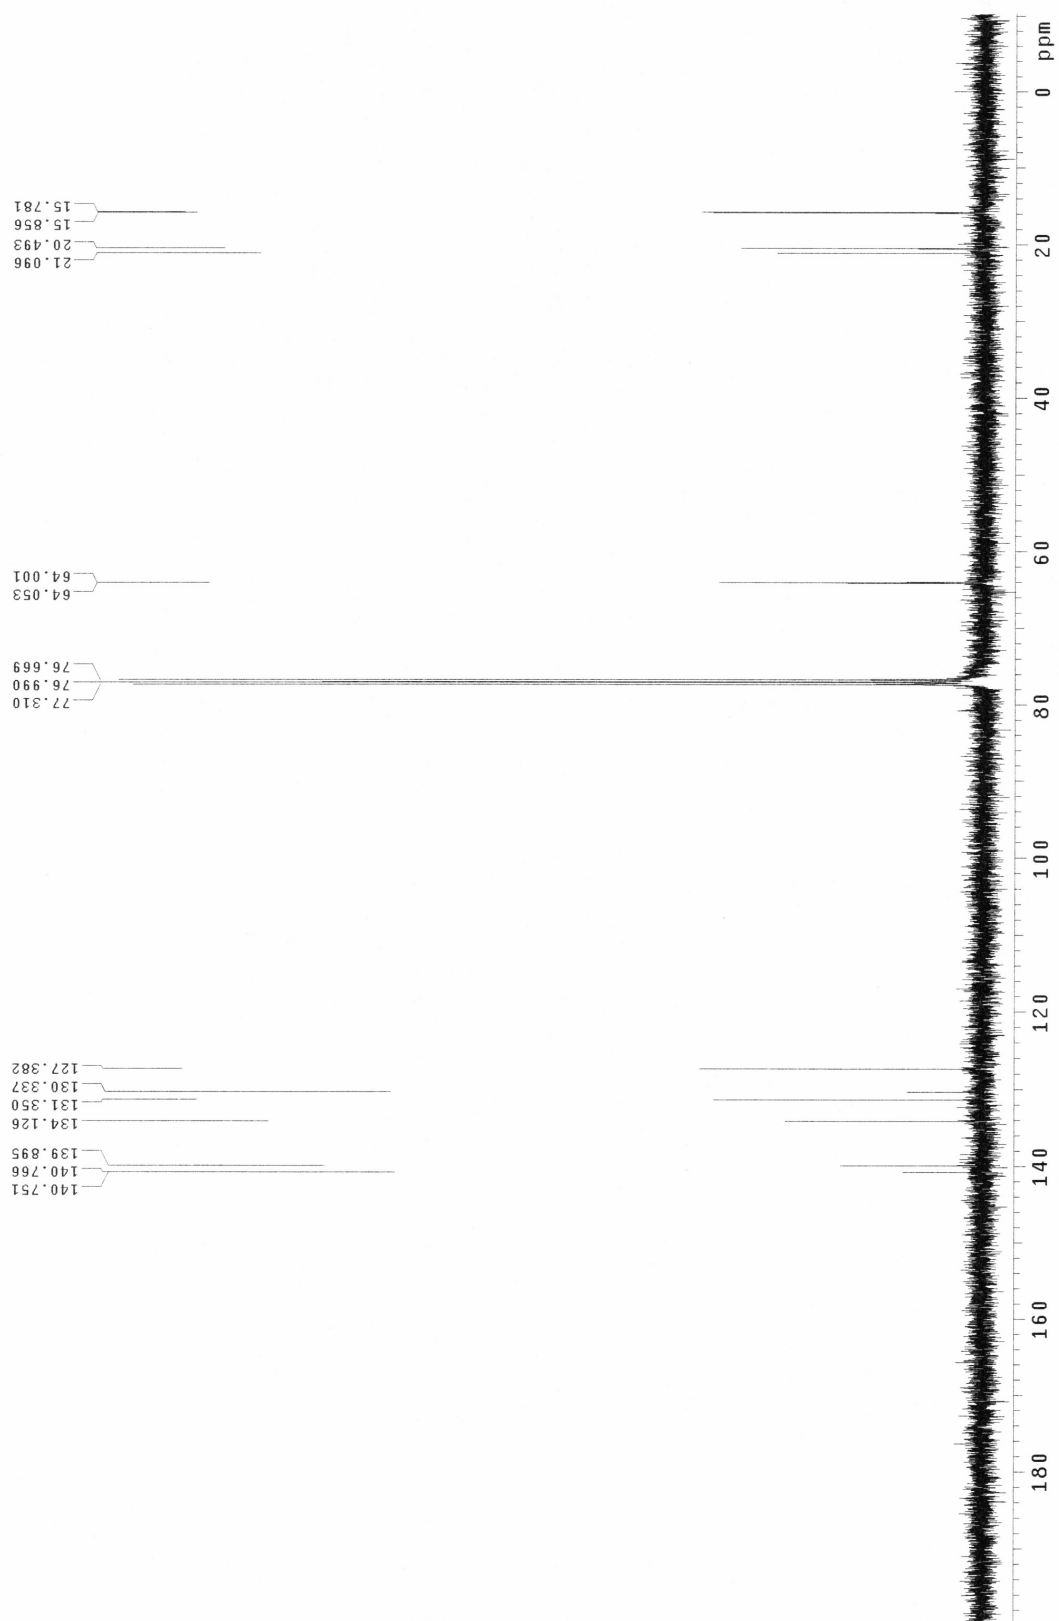

Sample: Ja-9-197-c  
Sample ID: S\_20221020\_03  
File: 0003.F1d  
Pulse Sequence: s2pul



**$^{31}\text{P}$  NMR (162 MHz) in  $\text{CDCl}_3$** 

Sample: Ja-9-197-p  
File: exp  
Pulse Sequence: s2pul  
Solvent:  $\text{cdCl}_3$   
Temp.: 25.0 C / 298.1 K  
Operator: Jykang  
VNMR-400 "Varian-NMR"  
Relax. delay 1.000 sec  
Pulse 45.0 degrees  
Acq. time 1.600 sec  
Width 21186.4 Hz  
10 repetitions  
OBSERVE P31, 161.7720621 MHz  
DECOUPLE H1, 399.6314735 MHz  
Power 40 dB  
continuously on  
WALTZ-16 modulated  
DATA PROCESSING  
Line broadening 1.0 Hz  
FT size 131072  
Total time 0 min, 26 sec

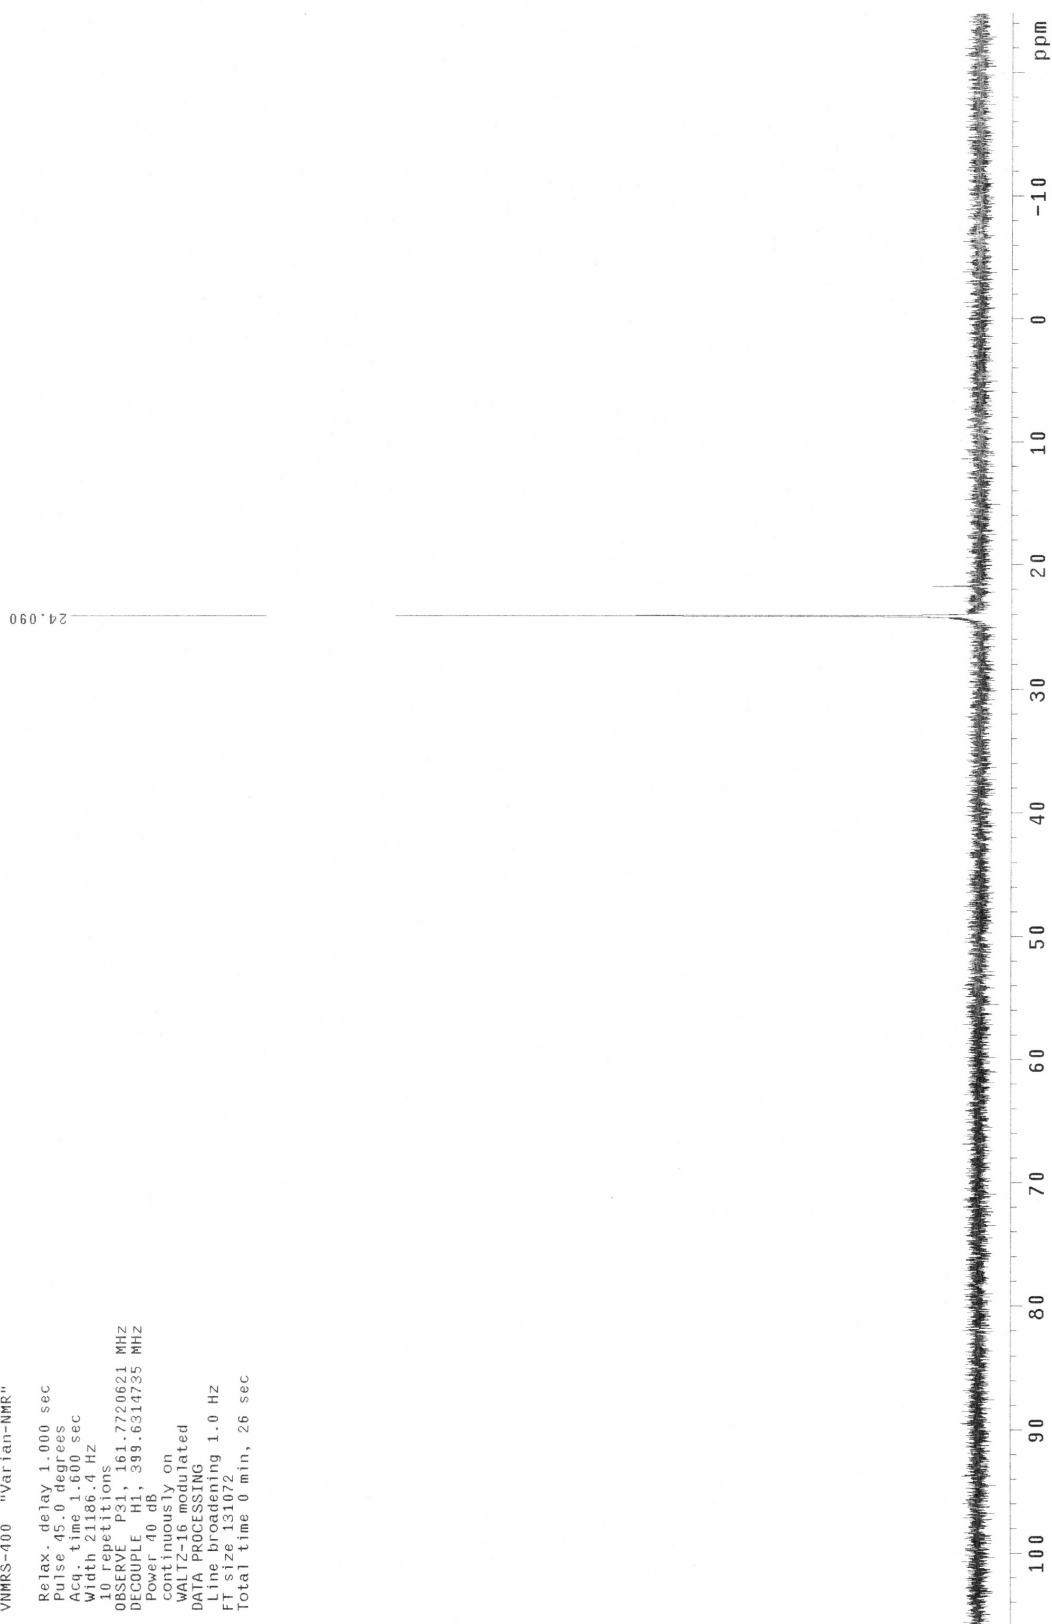



$^1\text{H}$  NMR (400 MHz) in  $\text{CDCl}_3$ 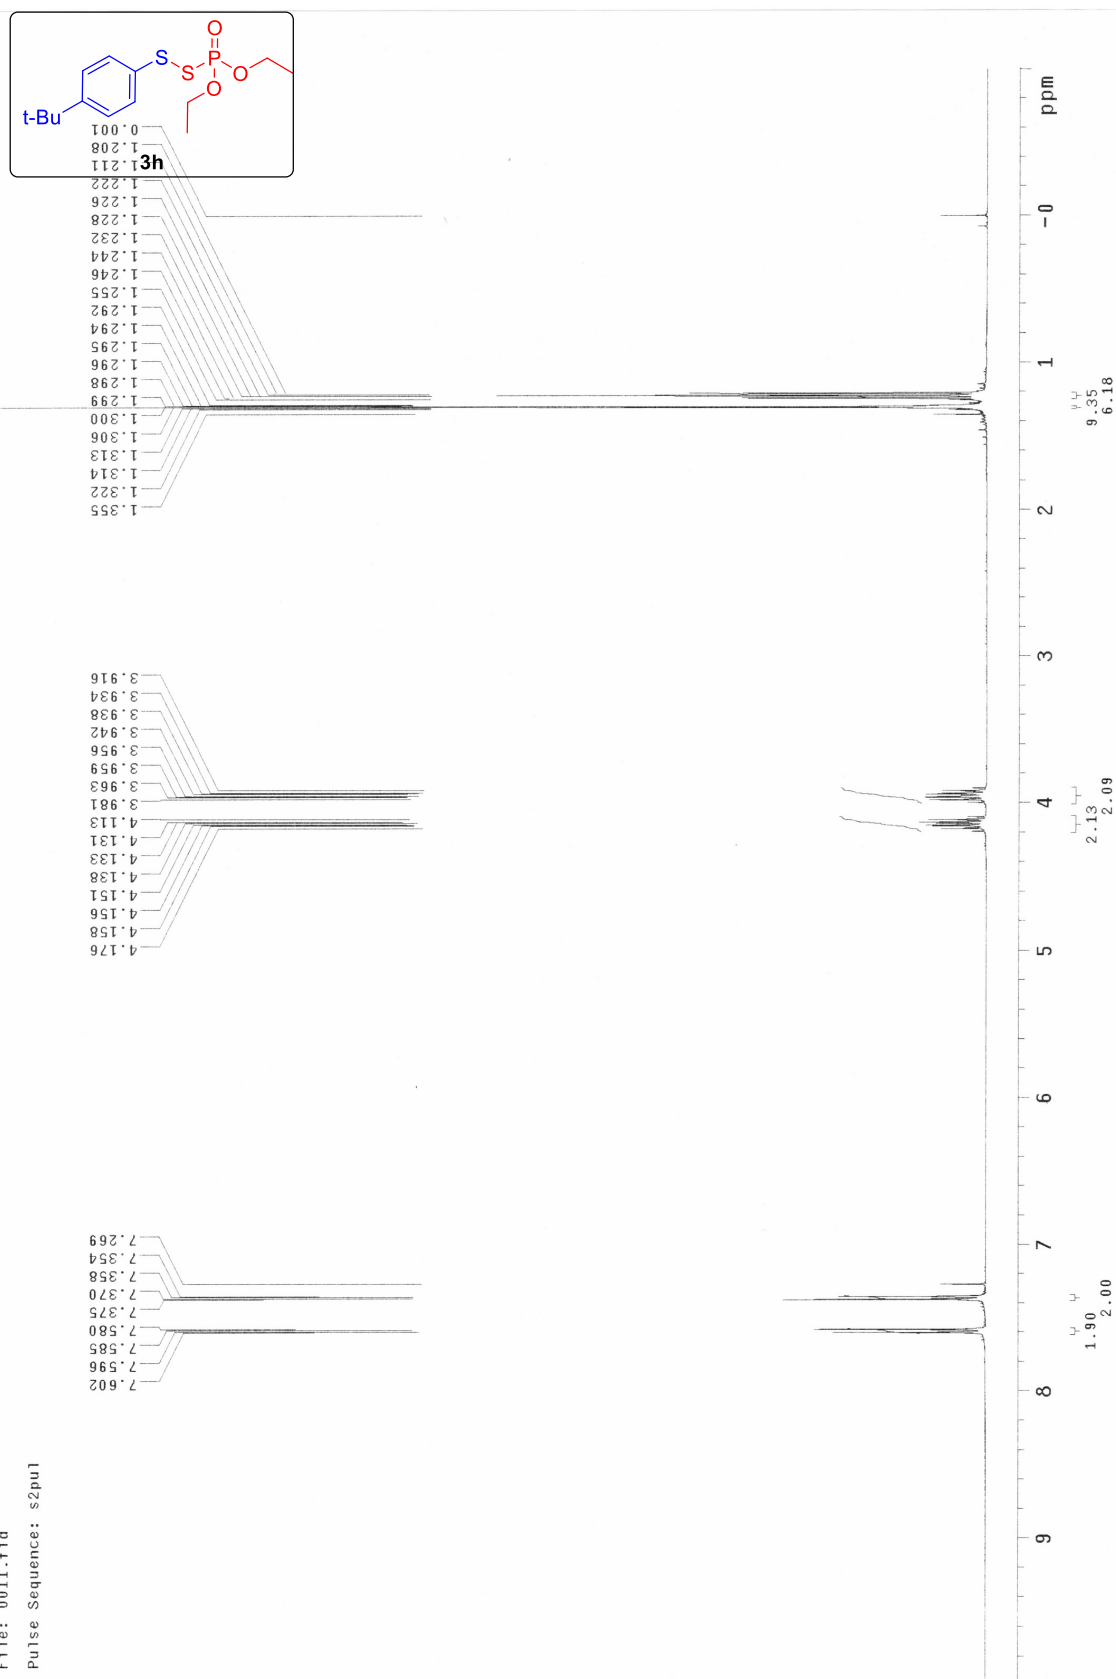



**$^{13}\text{C}$  NMR (100.5 MHz) in  $\text{CDCl}_3$** 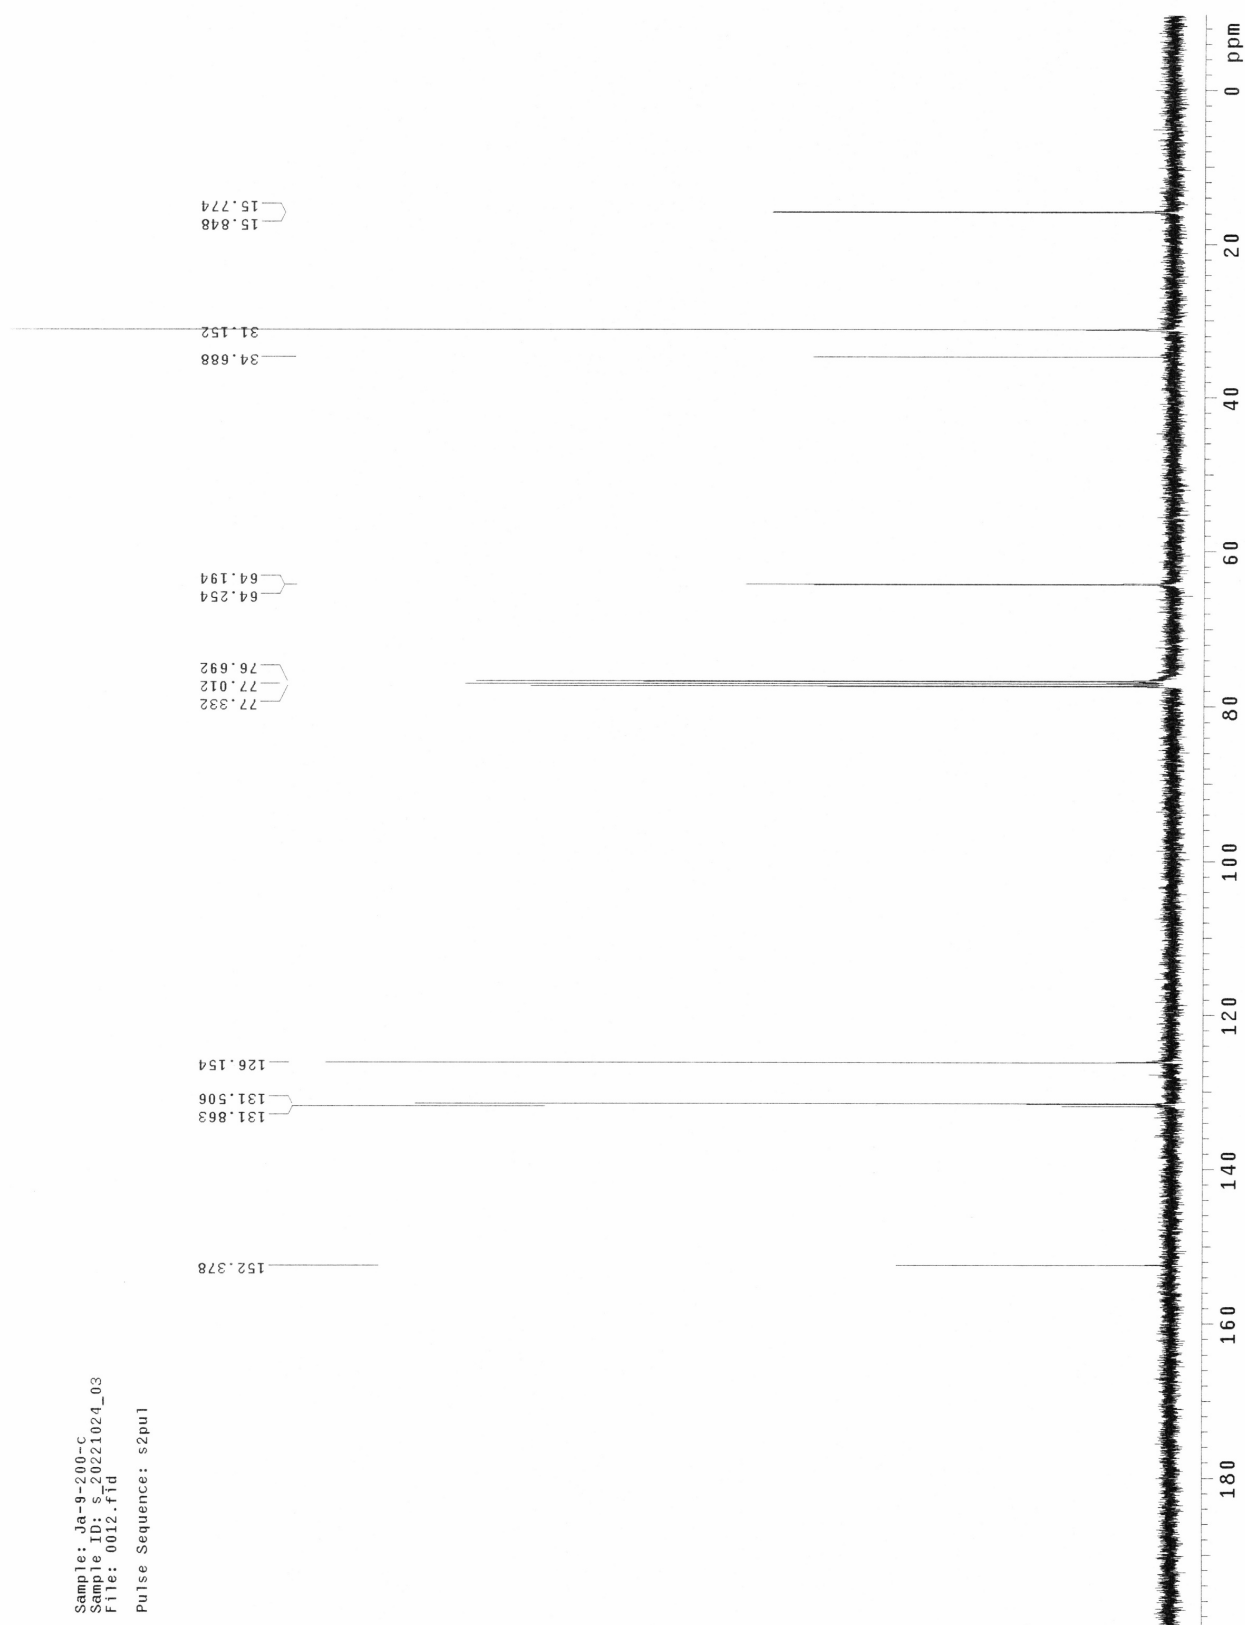



**$^{31}\text{P}$  NMR (162 MHz) in  $\text{CDCl}_3$** 

Sample: Ja-9-200-p  
File: exp  
Pulse Sequence: s2pul  
Solvent: cdc13  
Temp: 25.0 C / 298.1 K  
Operator: jvkang  
VNMR-400 "Varian-NMR"  
Relax. delay 1.000 sec  
Pulse 45.0 degrees  
Acq. time 1.000 sec  
F1 24186.4 Hz  
10.000000000000000  
OBSERVE P1, 161.7720621 MHz  
DECOUPLE H1, 399.6314755 MHz  
Power 40 dB, continuously on  
WALTZ-16 modulated  
DATA PROCESSING  
Line broadening 1.0 Hz  
FT size 131072  
Total time 0 min, 26 sec

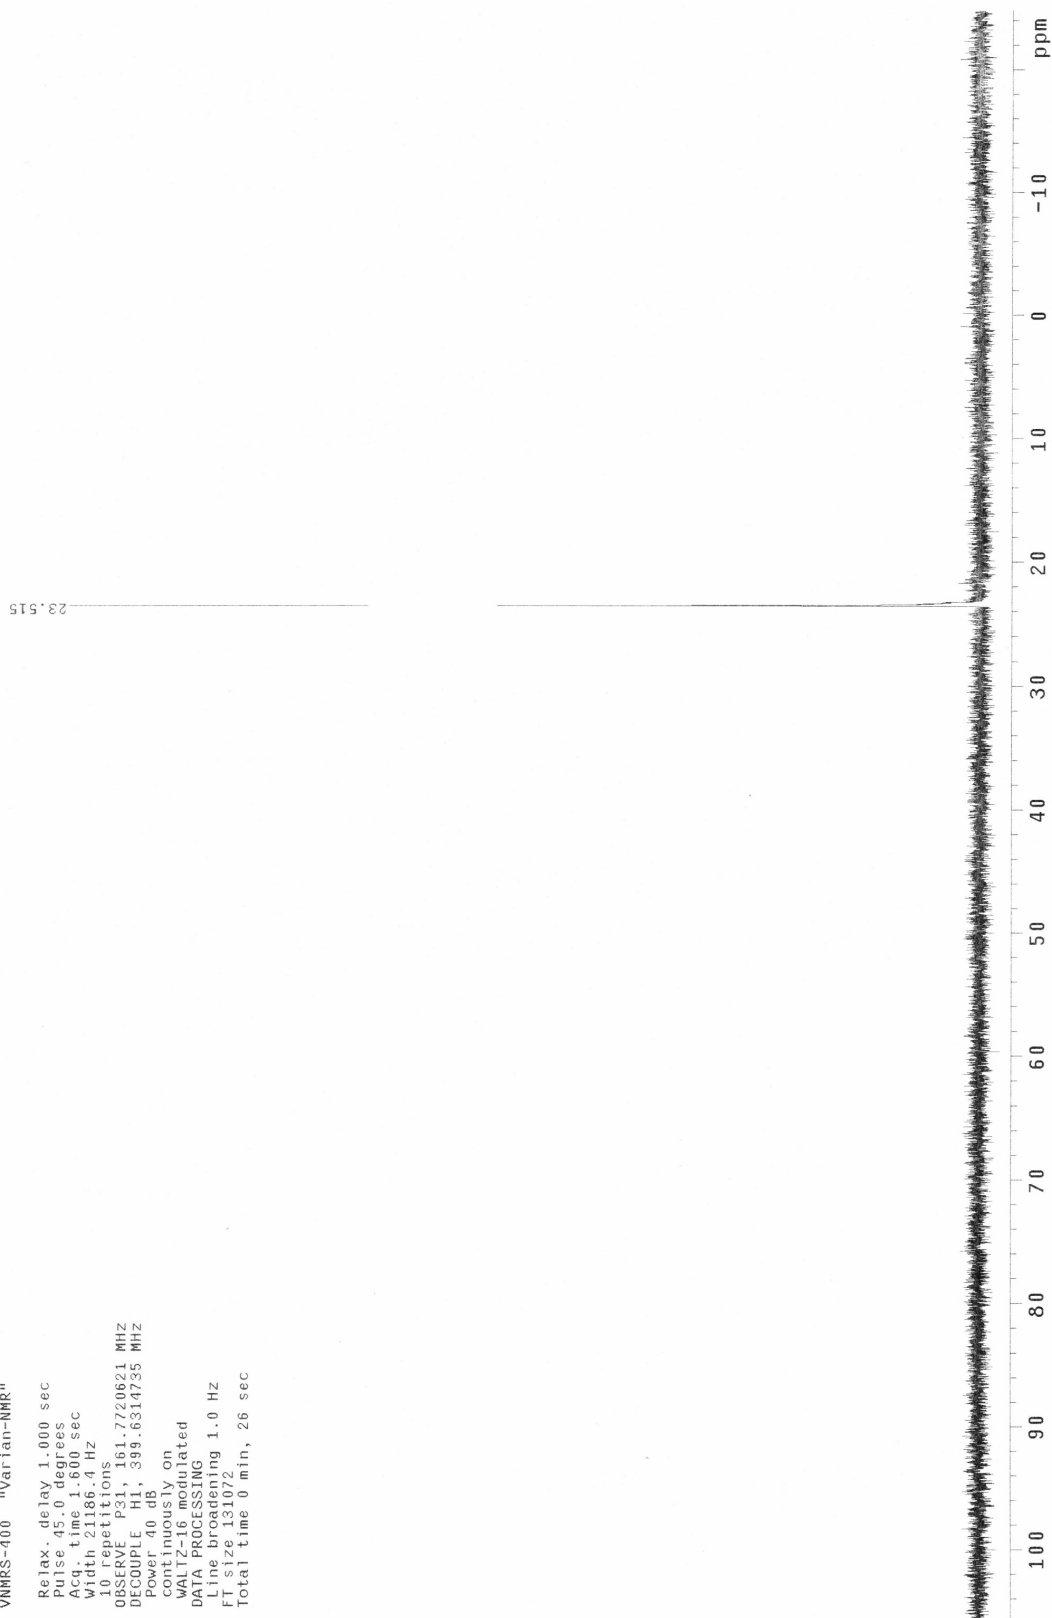



CCOP(=O)(OCC)SSC1CCCCC1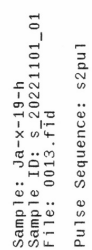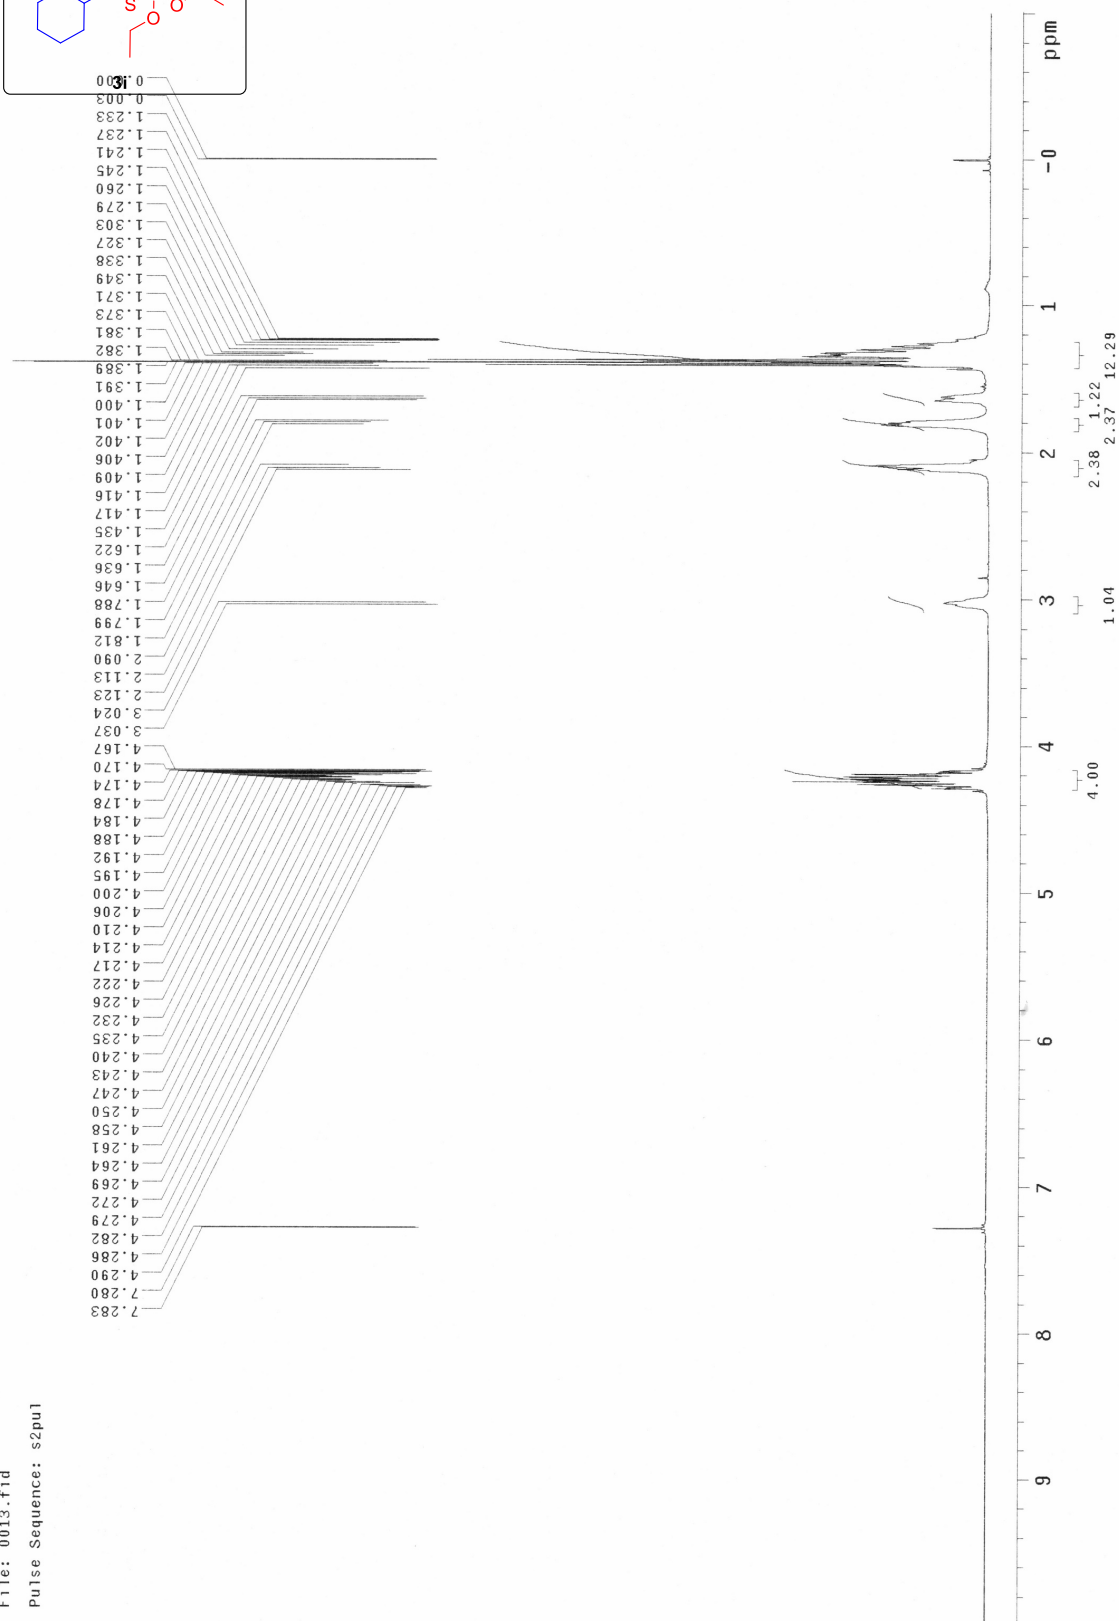



**$^{13}\text{C}$  NMR (100.5 MHz) in  $\text{CDCl}_3$** 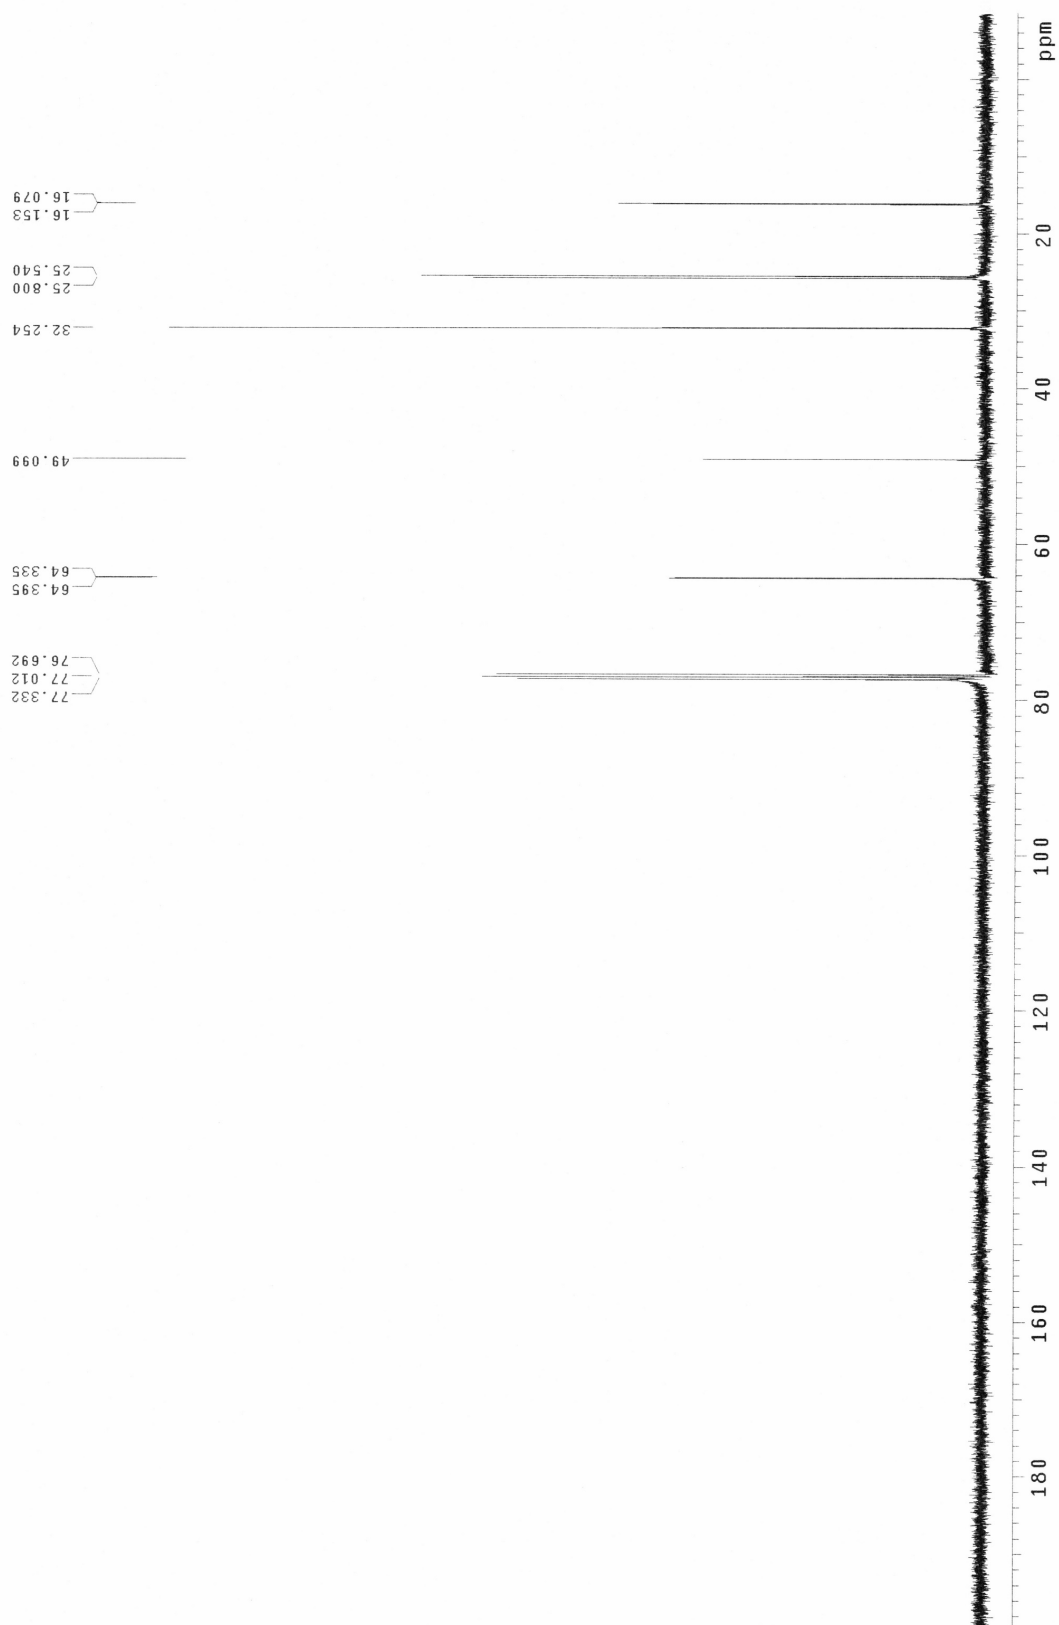

Sample: Ja-x-19-c  
Sample ID: s20221101\_02  
File: 0014.fid  
Pulse Sequence: s2pu1



**$^{31}\text{P}$  NMR (162 MHz) in  $\text{CDCl}_3$** 

Sample: Ja-x-19-p  
File: exp  
Pulse Sequence: s2pul  
Solvent: cdc13  
Temp: 25.0 C / 298.1 K  
Operator: jwang  
VNMR-400 "Varian-NMR"  
Relax. delay 1.000 sec  
Pulse 45.0 degrees  
Acq. time 1.600 sec  
Width 21186.4 Hz  
10 repetitions  
OBSERVE P31, 161.7720621 MHz  
DECOUPLE H1, 399.6314735 MHz  
Power 40 dB  
continuously on  
WALTZ-16 modulated  
DATA PROCESSING  
Line broadening 1.0 Hz  
FT size 131072  
Total time 0 min, 26 sec

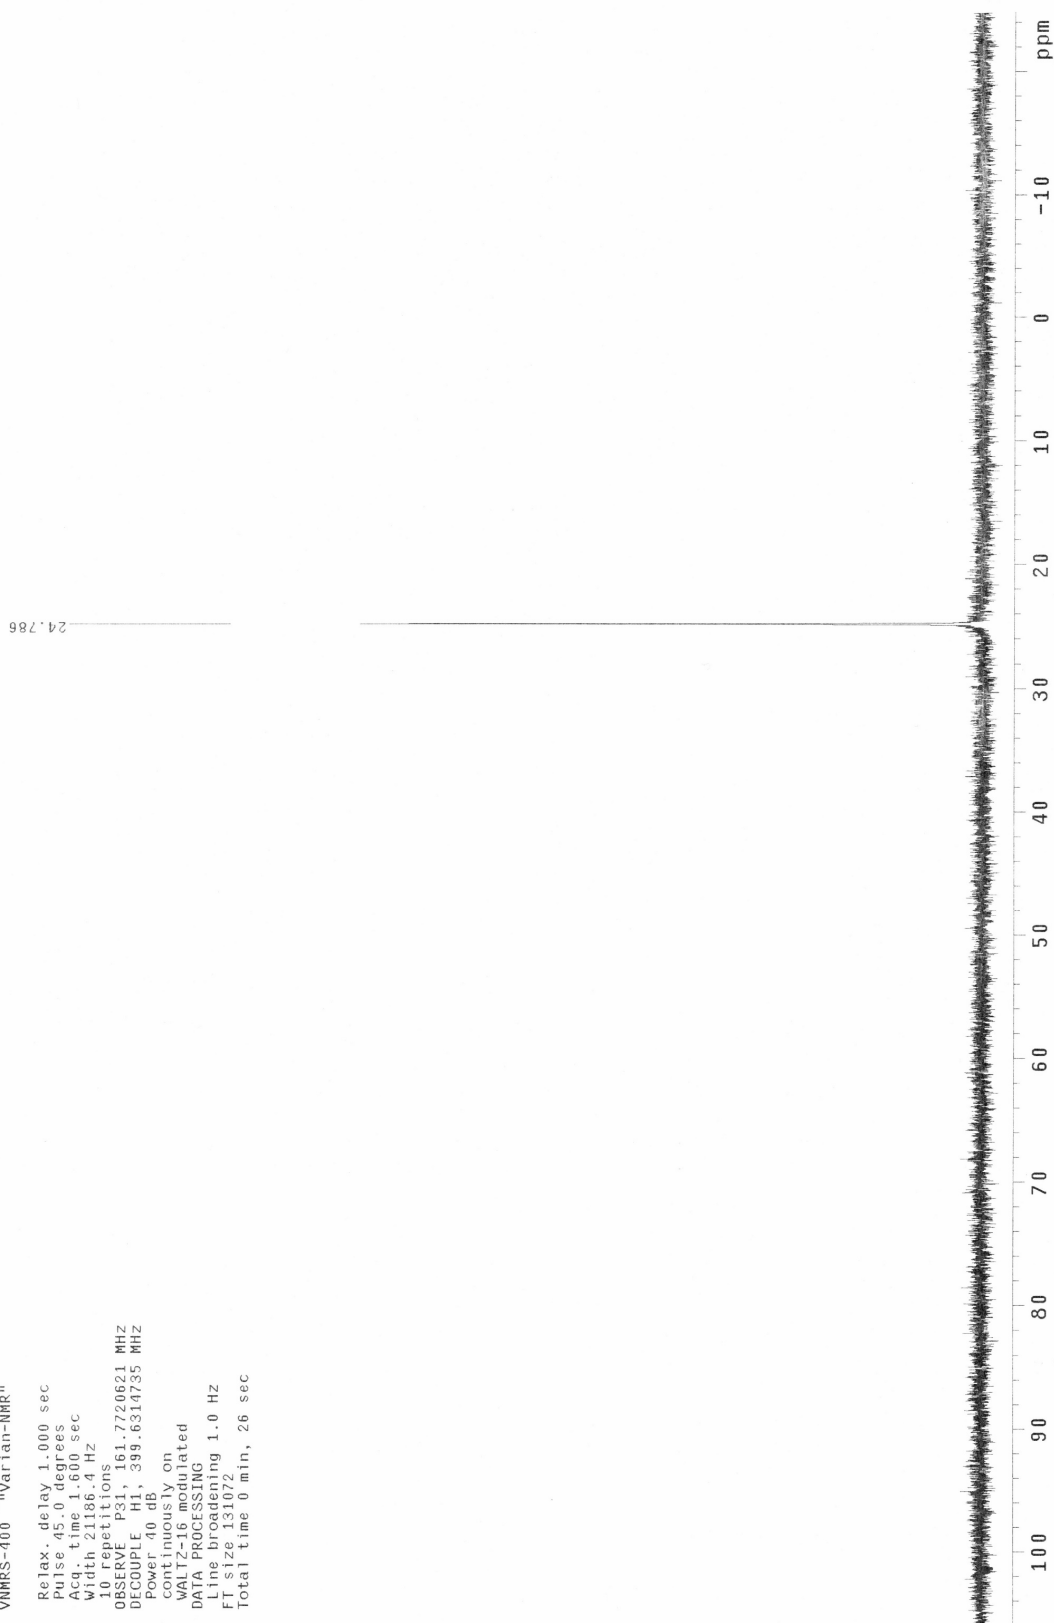



$^1\text{H}$  NMR (400 MHz) in  $\text{CDCl}_3$ 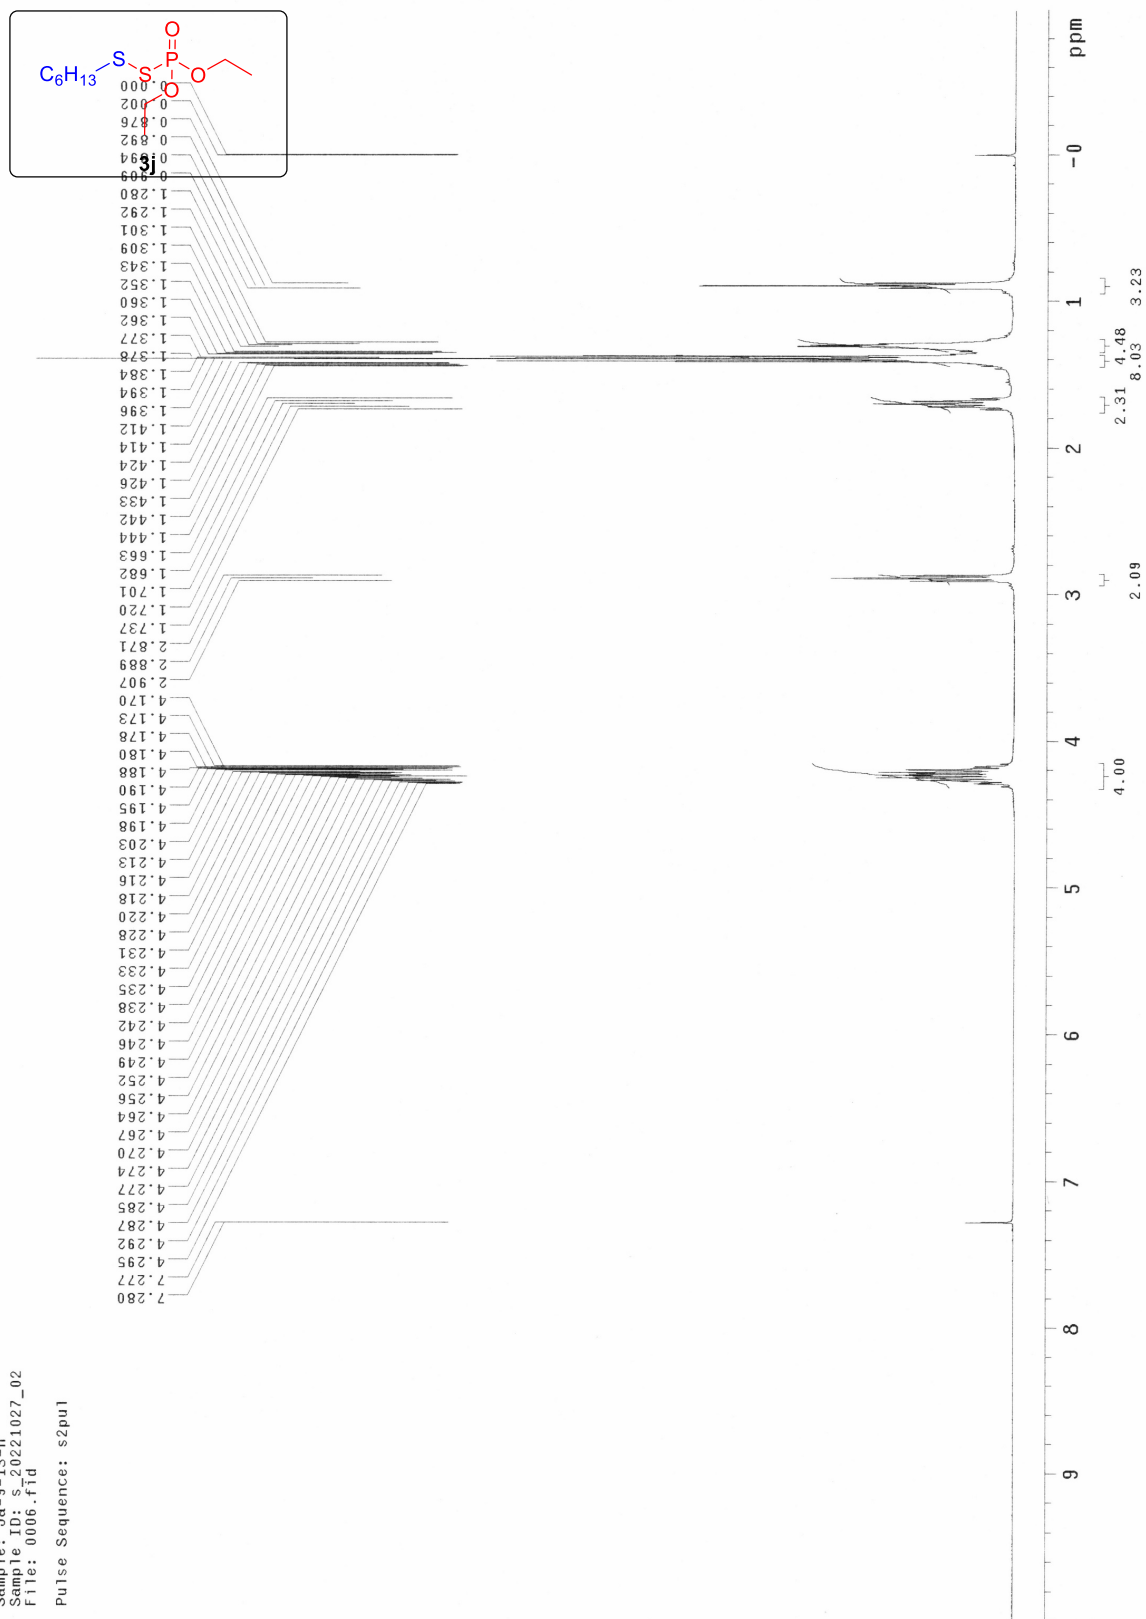



**$^{13}\text{C}$  NMR (100.5 MHz) in  $\text{CDCl}_3$** 

Sample: Ja-9-13-C  
Sample ID: s\_20221027\_03  
File: 0007.fId  
Pulse Sequence: s2pul

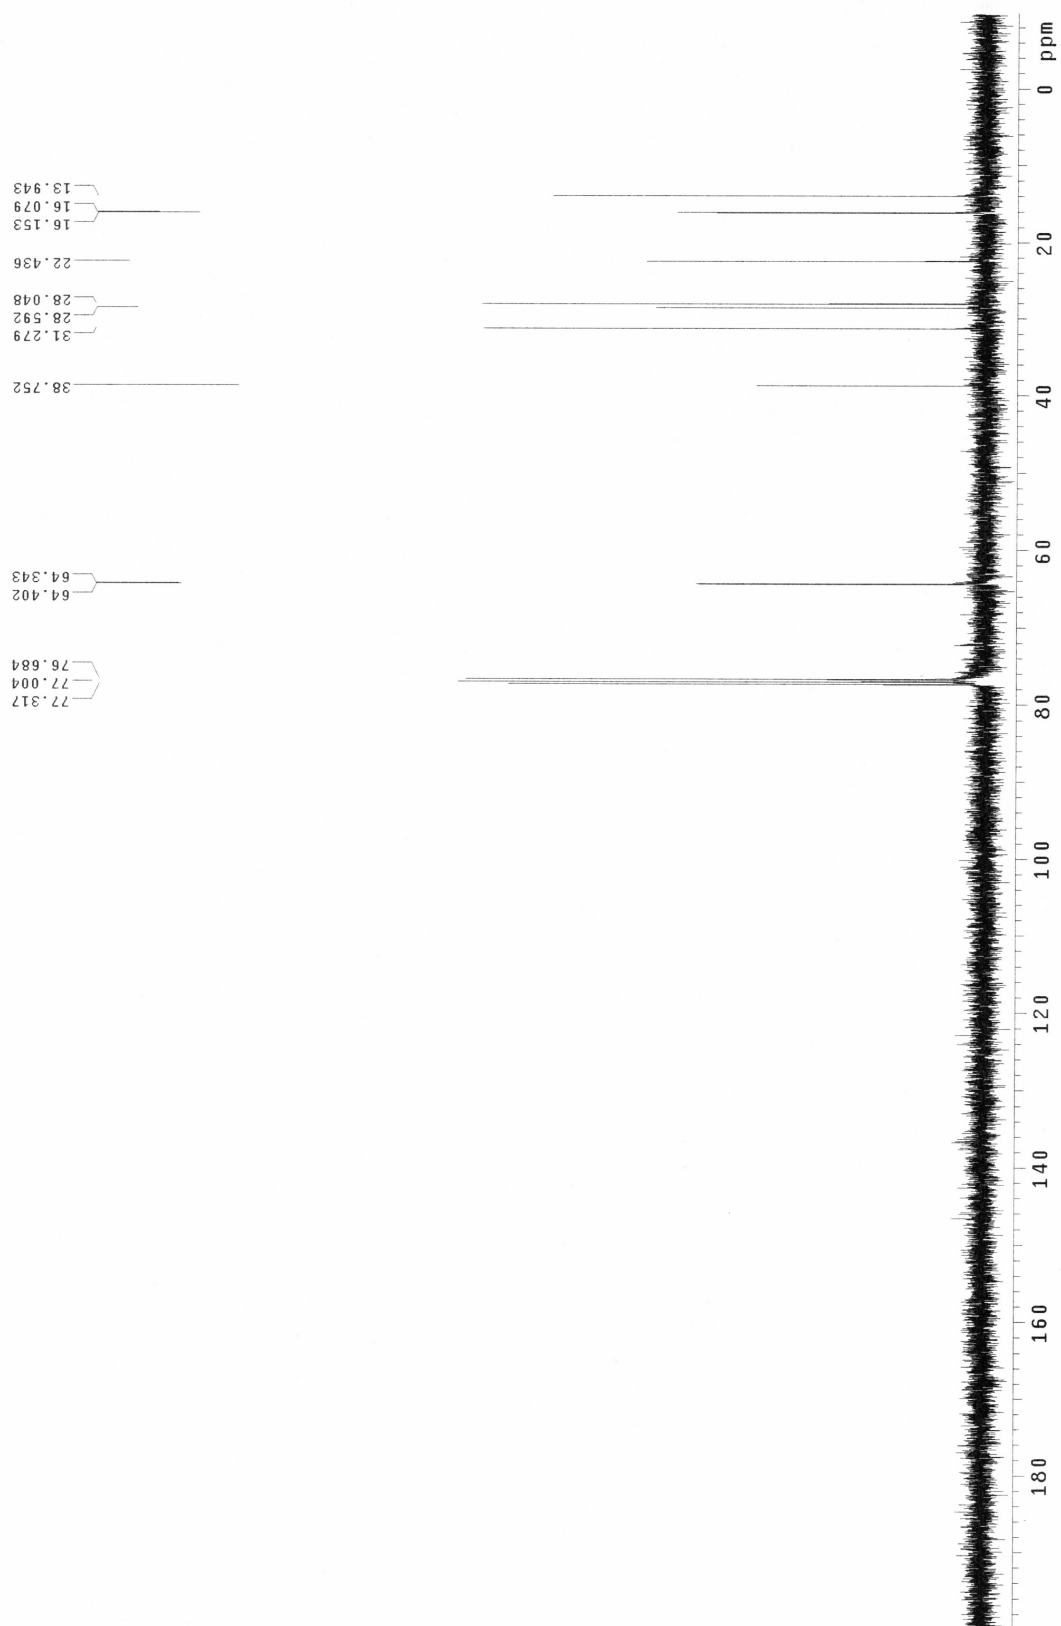



**$^{31}\text{P}$  NMR (162 MHz) in  $\text{CDCl}_3$** 

Sample: Ja-x-13-p  
File: exp  
Pulse Sequence: s2pul  
Solvent:  $\text{CDCl}_3$   
Temp. 25.0 C / 298.1 K  
Operator: Jykang  
VNMR-400 "Varian-NMR"  
Relax. delay 1.000 sec  
Pulse 45.0 degrees  
Acq. time 1.600 sec  
Width 21186.4 Hz  
10 repetitions  
OBSERVE P31, 161.7720621 MHz  
DECOUPLE H1, 399.6314735 MHz  
Power 40 dB,  
continuously on  
WALTZ-16 modulated  
DATA PROCESSING  
Line broadening 1.0 Hz  
FT size 131072  
Total time 0 min, 26 sec

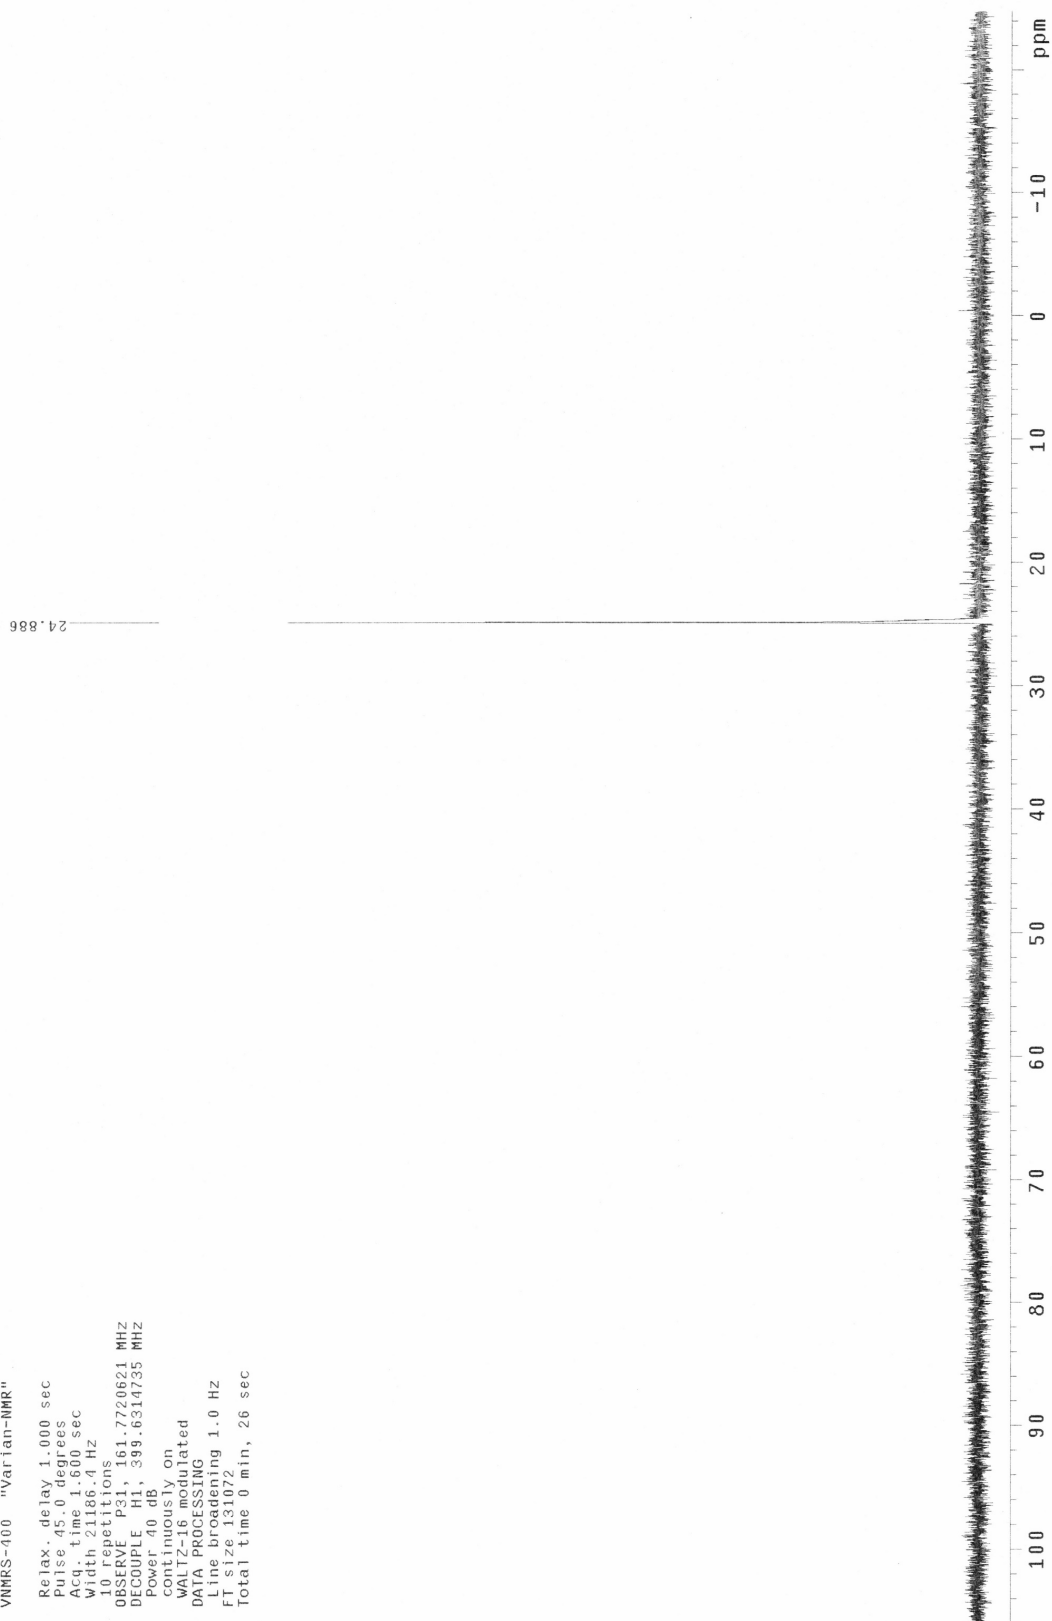



<sup>1</sup>H NMR (400 MHz) in CDCl<sub>3</sub>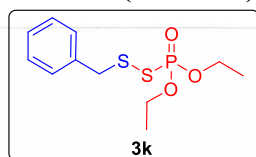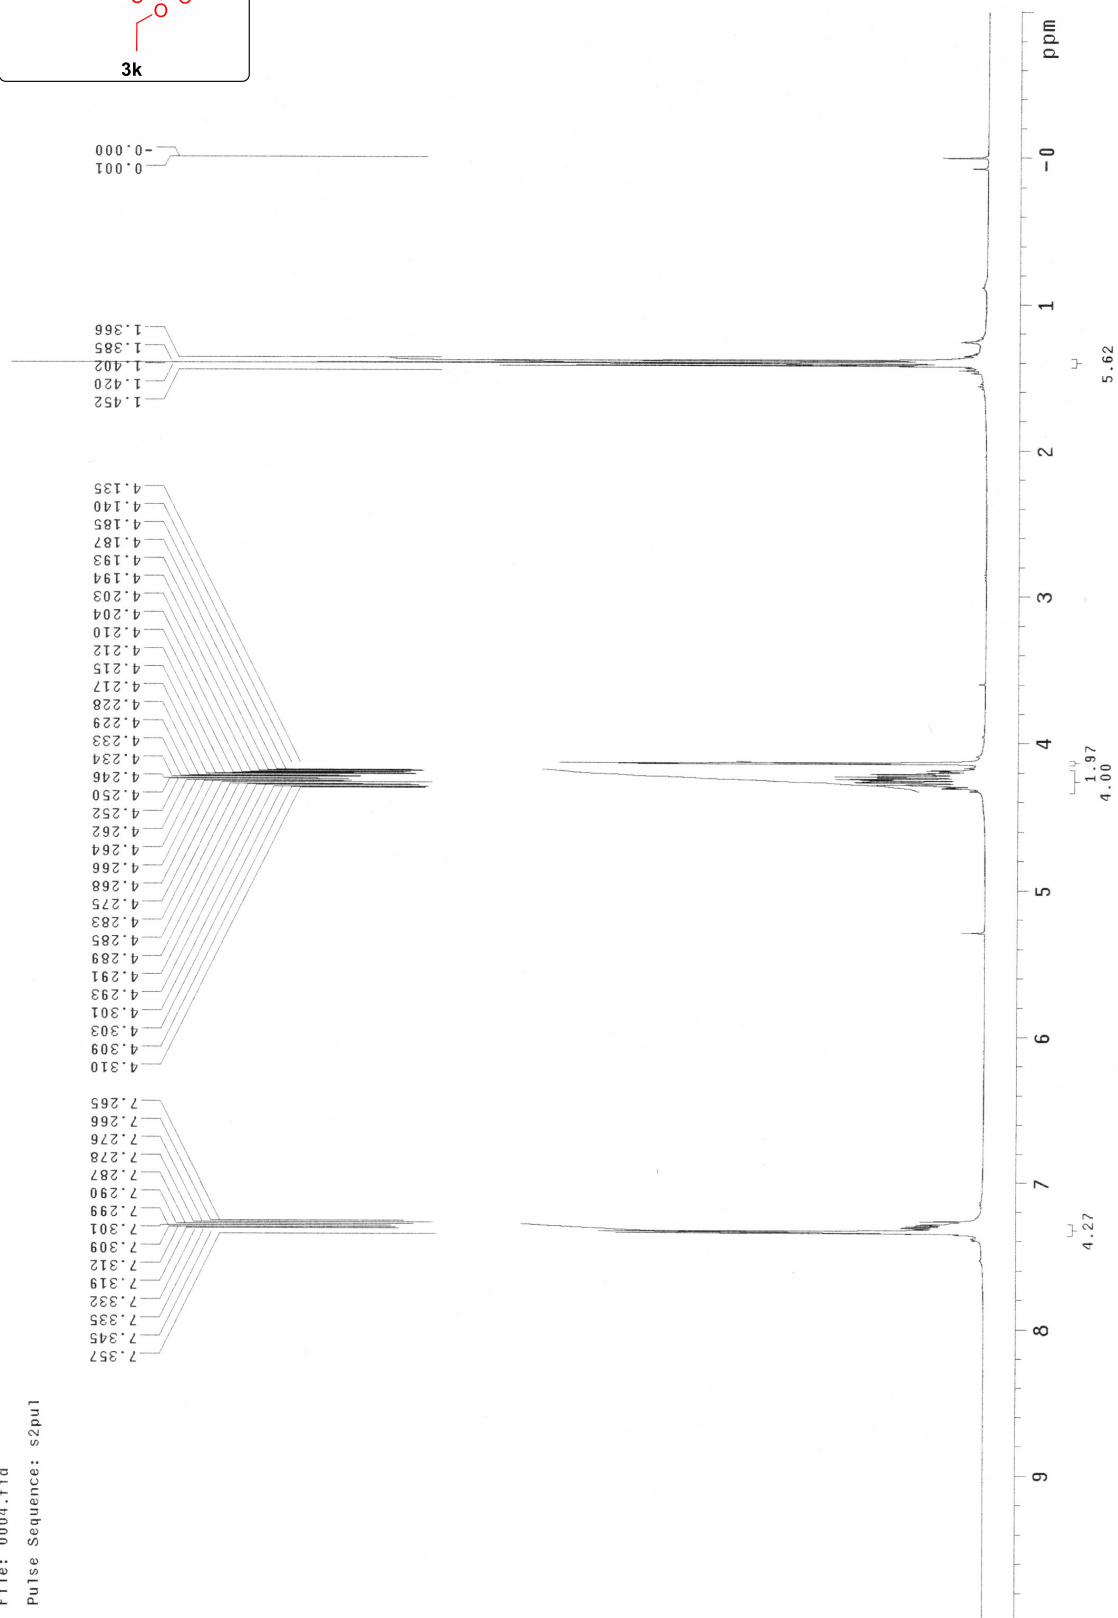



**$^{13}\text{C}$  NMR (100.5 MHz) in  $\text{CDCl}_3$** 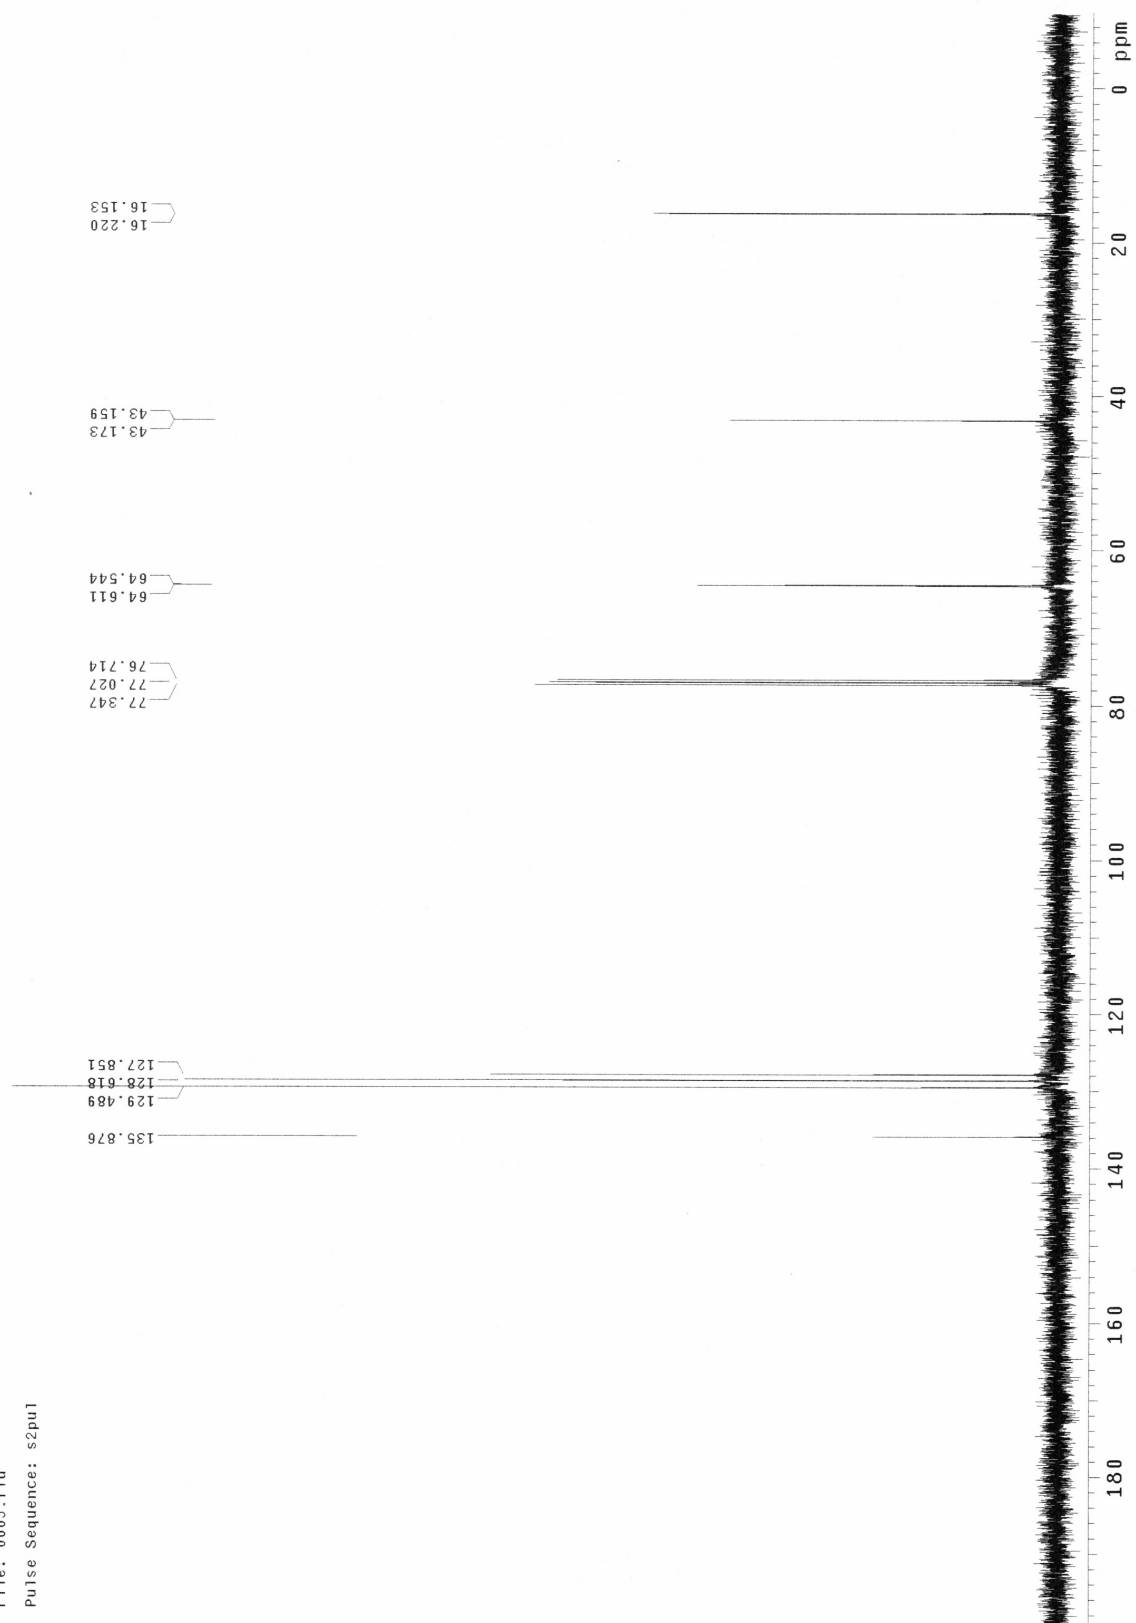

Sample: ja-9-198-c  
Sample ID: S\_20221020\_05  
File: 0005.fid  
Pulse Sequence: s2pu1



**$^{31}\text{P}$  NMR (162 MHz) in  $\text{CDCl}_3$** 

Sample: Ja-9-198-p  
File: exp  
Pulse Sequence: s2pul  
Solvent: cdcl3  
Temp: 25.0 C / 298.1 K  
Operator: JYKang  
VNMR-400 "Varian-NMR"  
Relax. delay 1.000 sec  
Pulse 45.0 degrees  
Acq. time 1.600 sec  
Width 21186.4 Hz  
10 repetitions  
OBSERVE P31, 161.7720621 MHz  
DECOUPLE H1, 399.6314735 MHz  
Power 40 dB  
continuously on  
WALTZ-16 modulated  
DATA PROCESSING  
Line broadening 1.0 Hz  
FT size 131072  
Total time 0 min, 26 sec

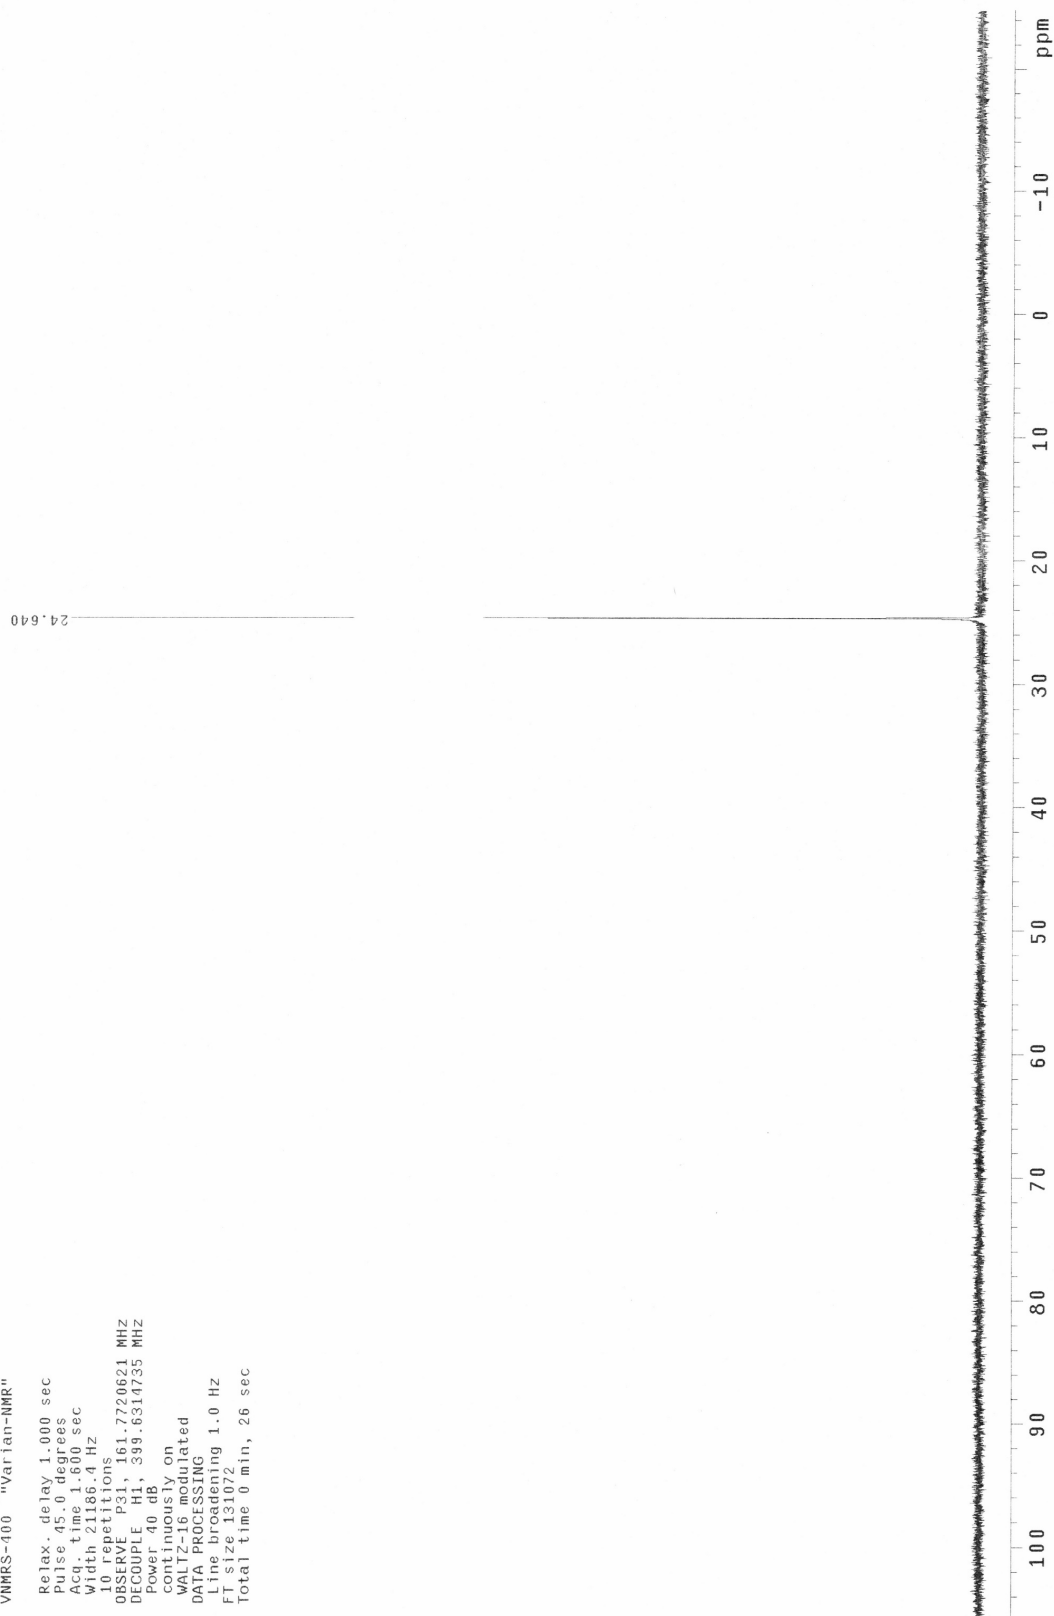



$^1\text{H}$  NMR (400 MHz) in  $\text{CDCl}_3$ 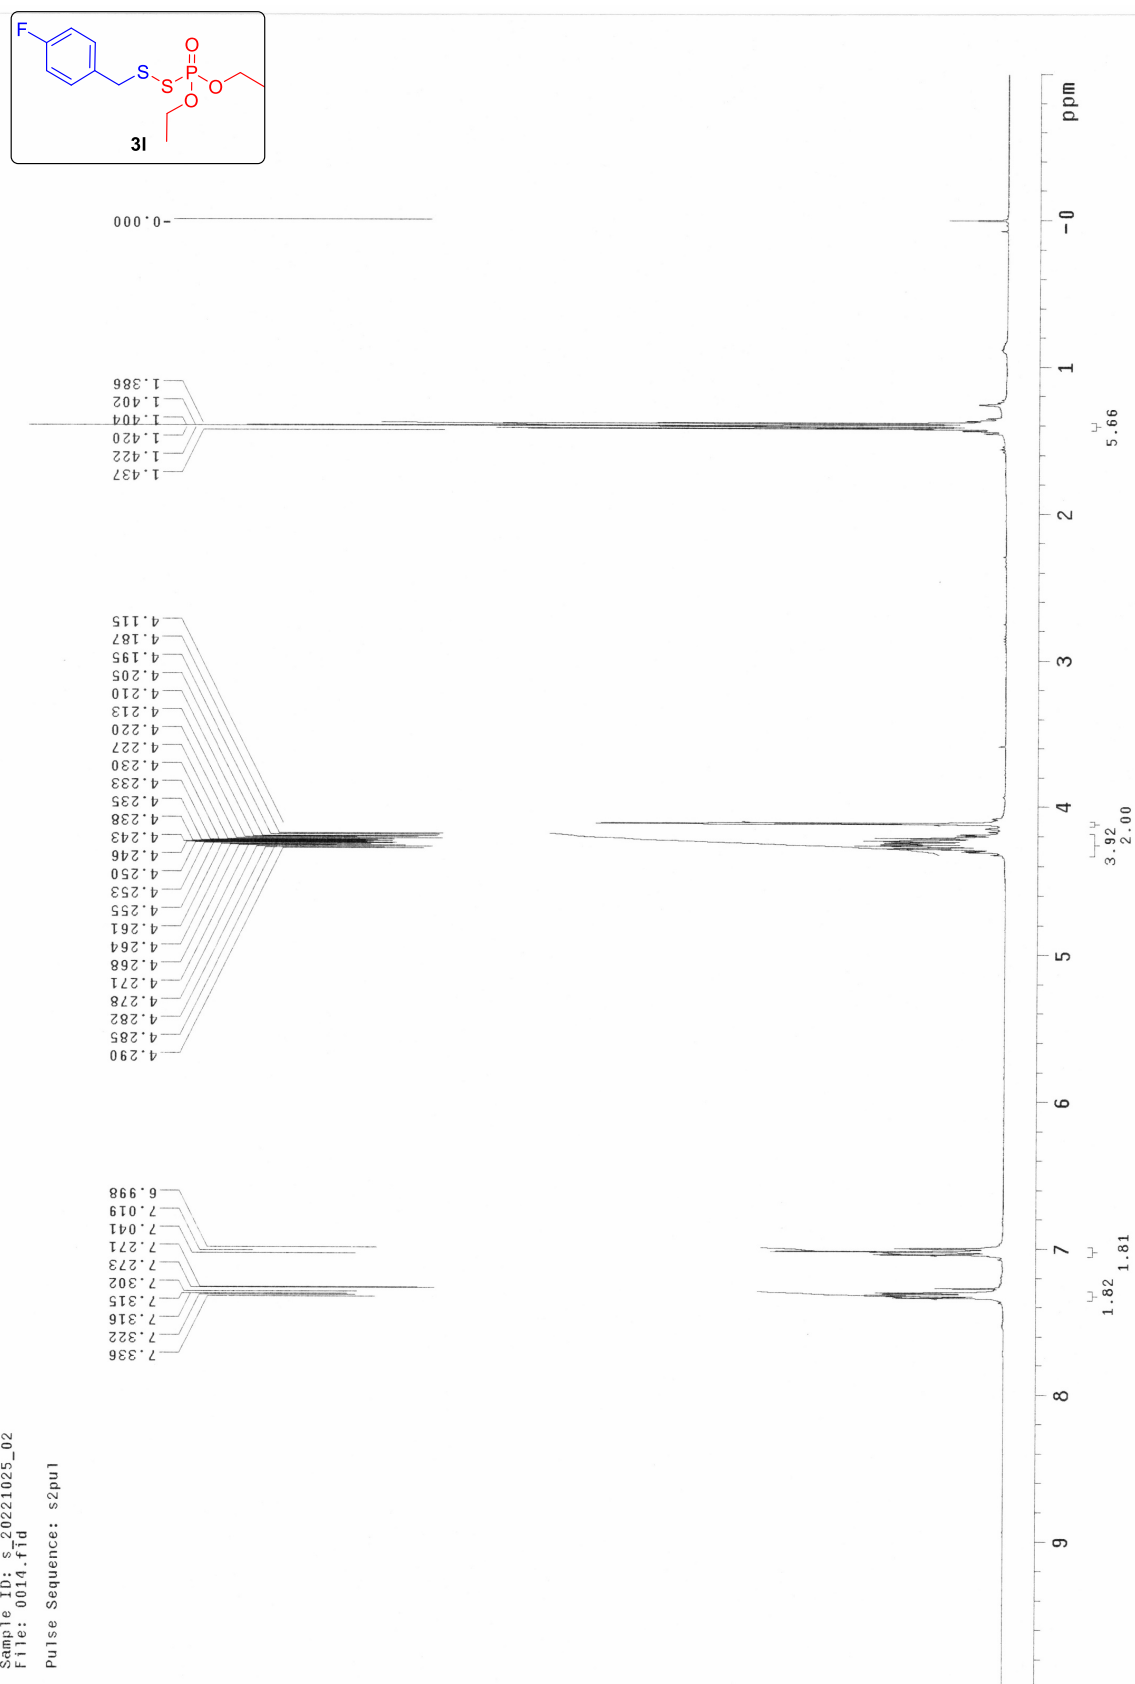



$^{13}\text{C}$  NMR (100.5 MHz) in  $\text{CDCl}_3$ 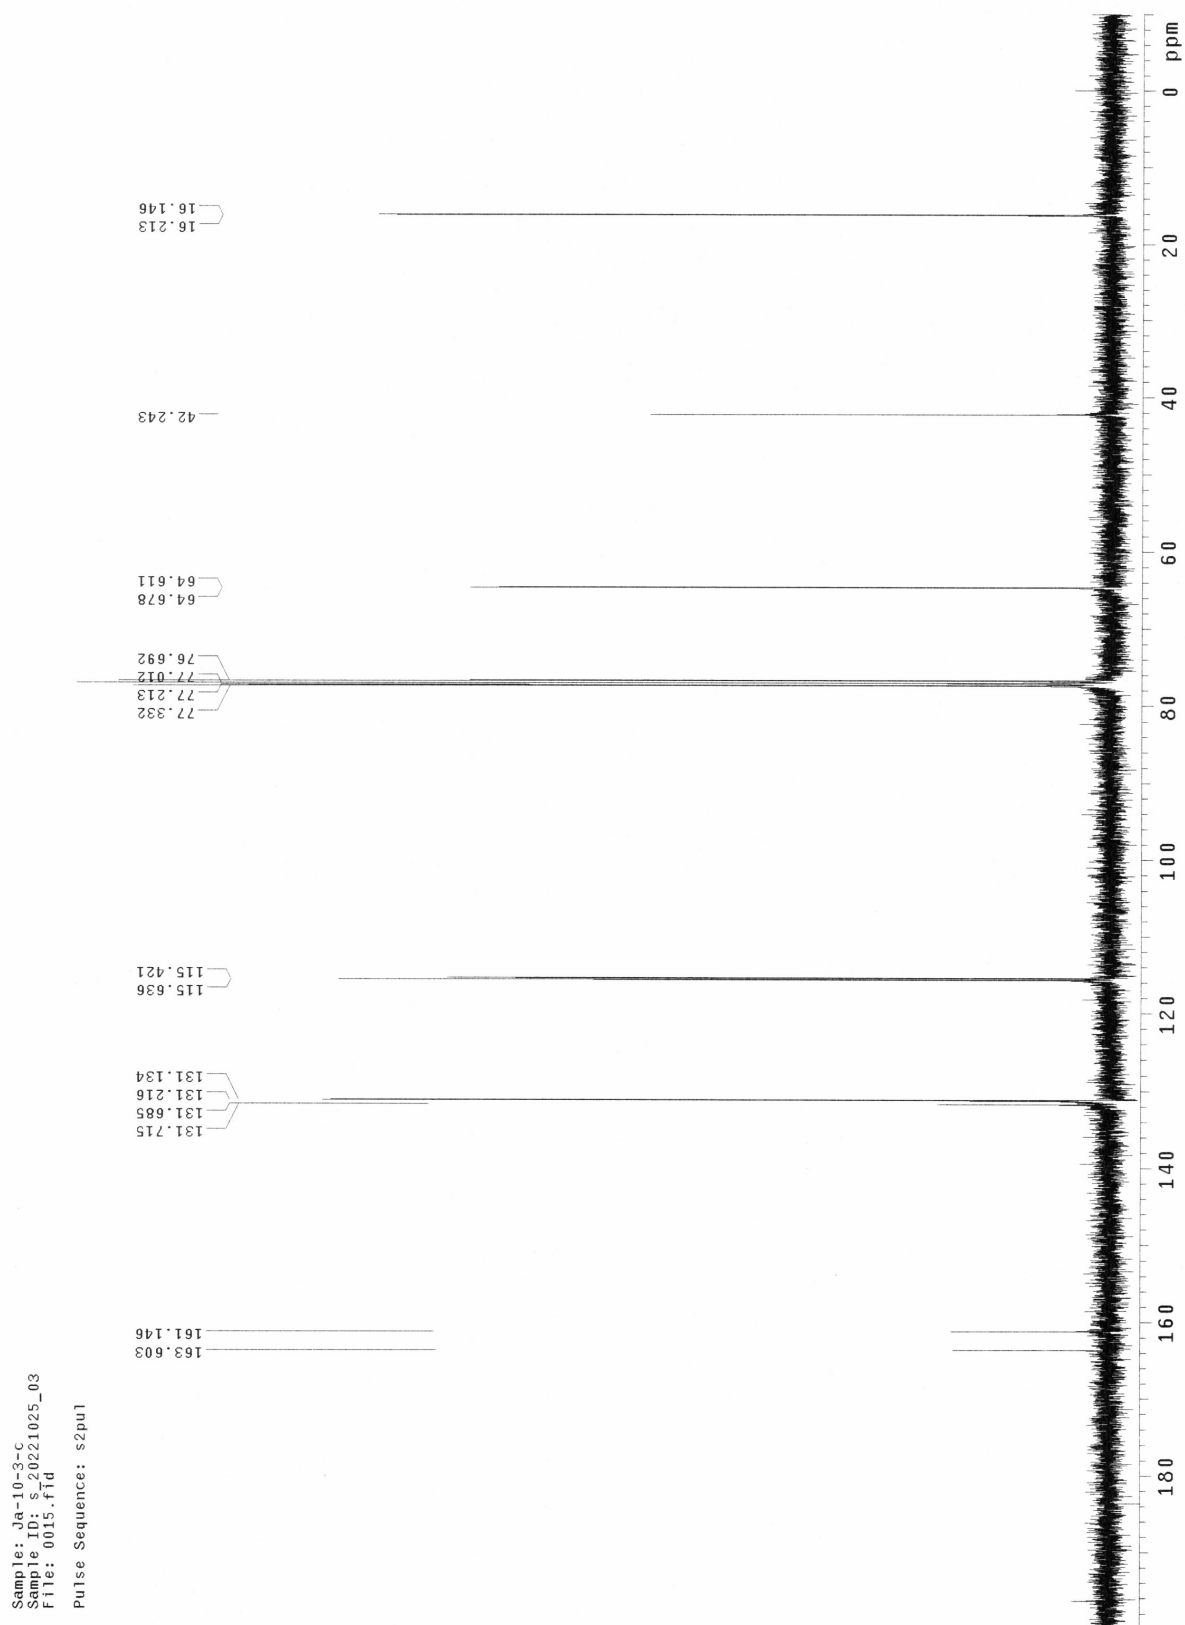



**$^{31}\text{P}$  NMR (162 MHz) in  $\text{CDCl}_3$** 

Sample: Ja-x-3-p  
File: exp  
Pulse Sequence: s2pul  
Solvent: cdc13  
Temp.: 25.0 C / 298.1 K  
Operator: jykang  
VNMR-400 "Varian-NMR"  
Relax. delay 1.000 sec  
Pulse 45.0 degrees  
Acq. time 1.600 sec  
Width 21186.4 Hz  
10 repetitions  
OBSERVE P31, 161.7720621 MHz  
DECOUPLE H1, 399.6314735 MHz  
Power 40 dB,  
continuously on  
WALTZ-16 modulated  
DATA PROCESSING  
Line broadening 1.0 Hz  
FT size 131072  
Total time 0 min, 26 sec

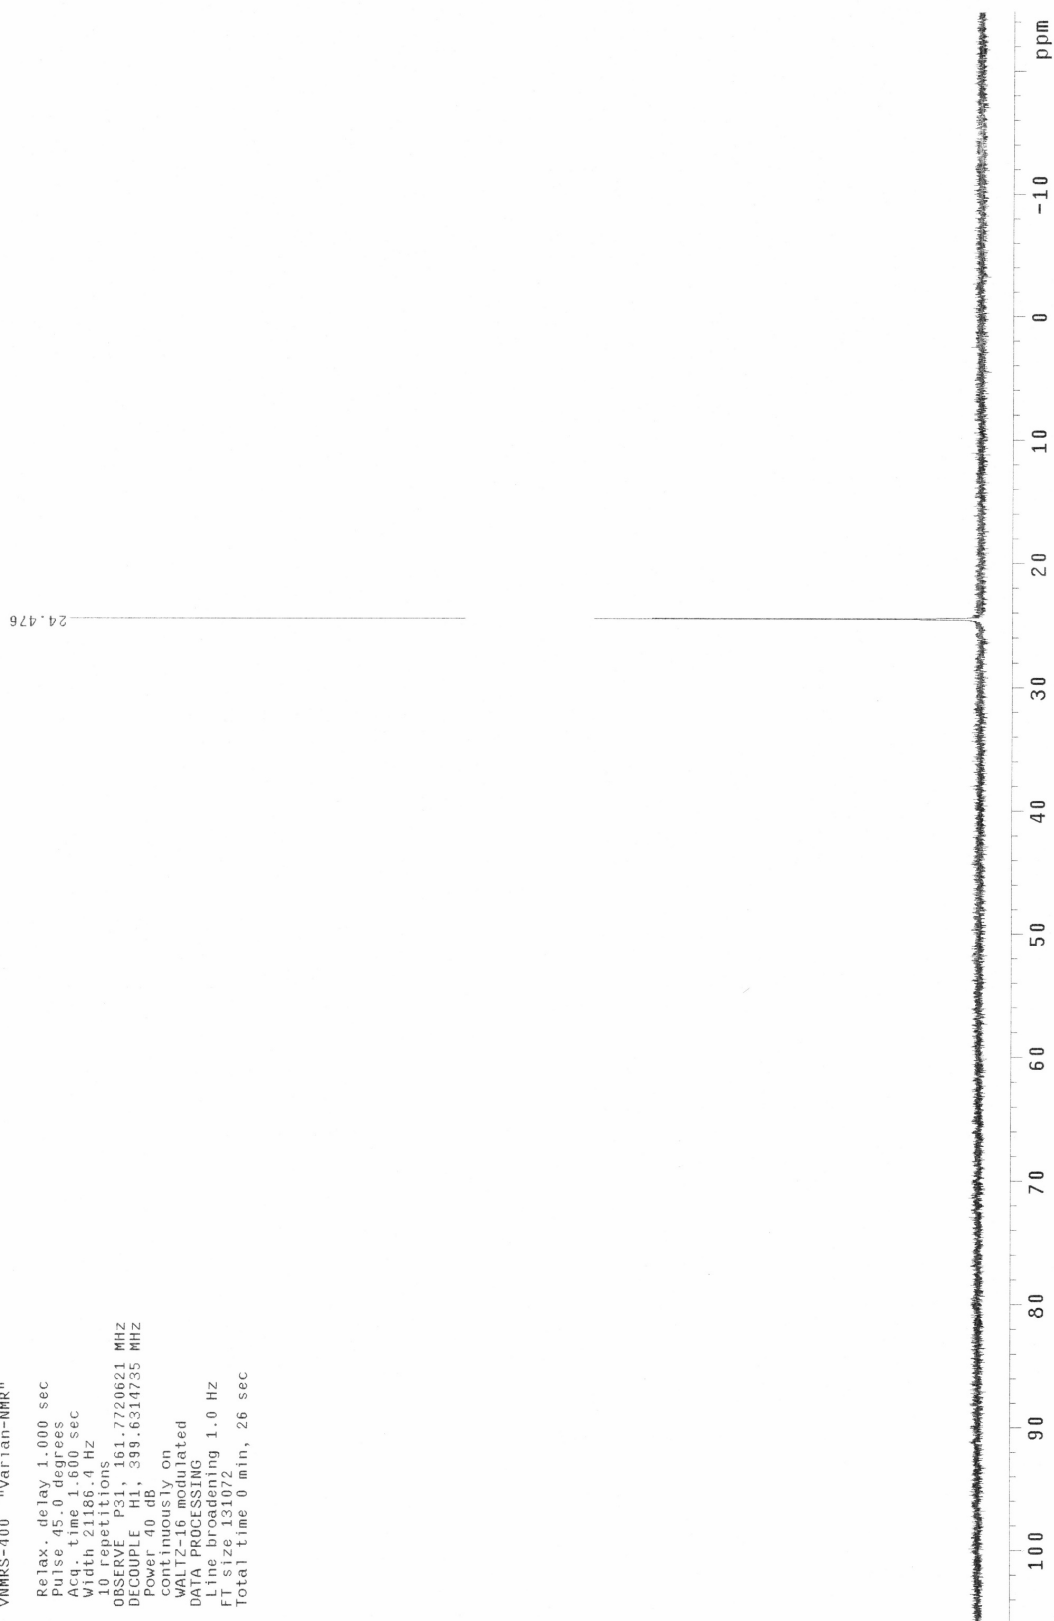



**<sup>1</sup>H NMR (400 MHz) in CDCl<sub>3</sub>**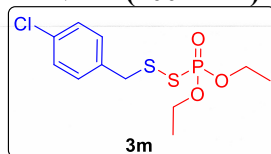

Sample: Ja-x-30-h  
Sample ID: s20221107\_01  
File: 0048.f1d  
Pulse Sequence: s2pul

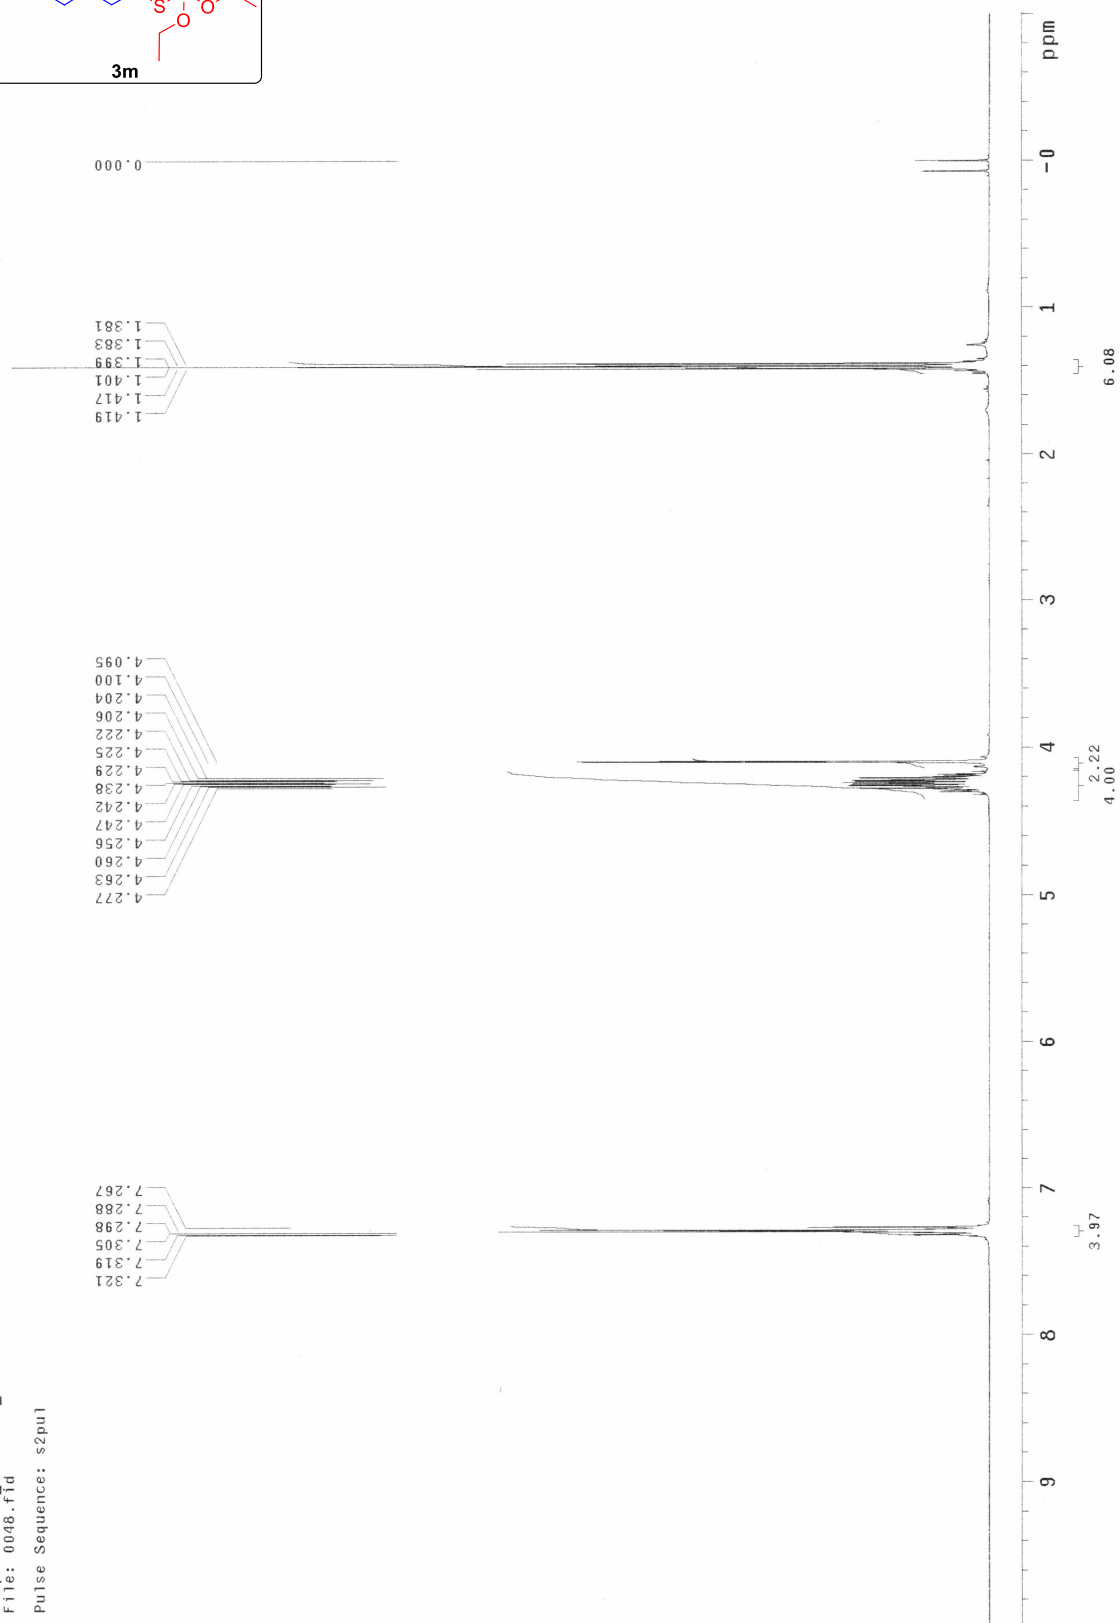



**$^{13}\text{C}$  NMR (100.5 MHz) in  $\text{CDCl}_3$** 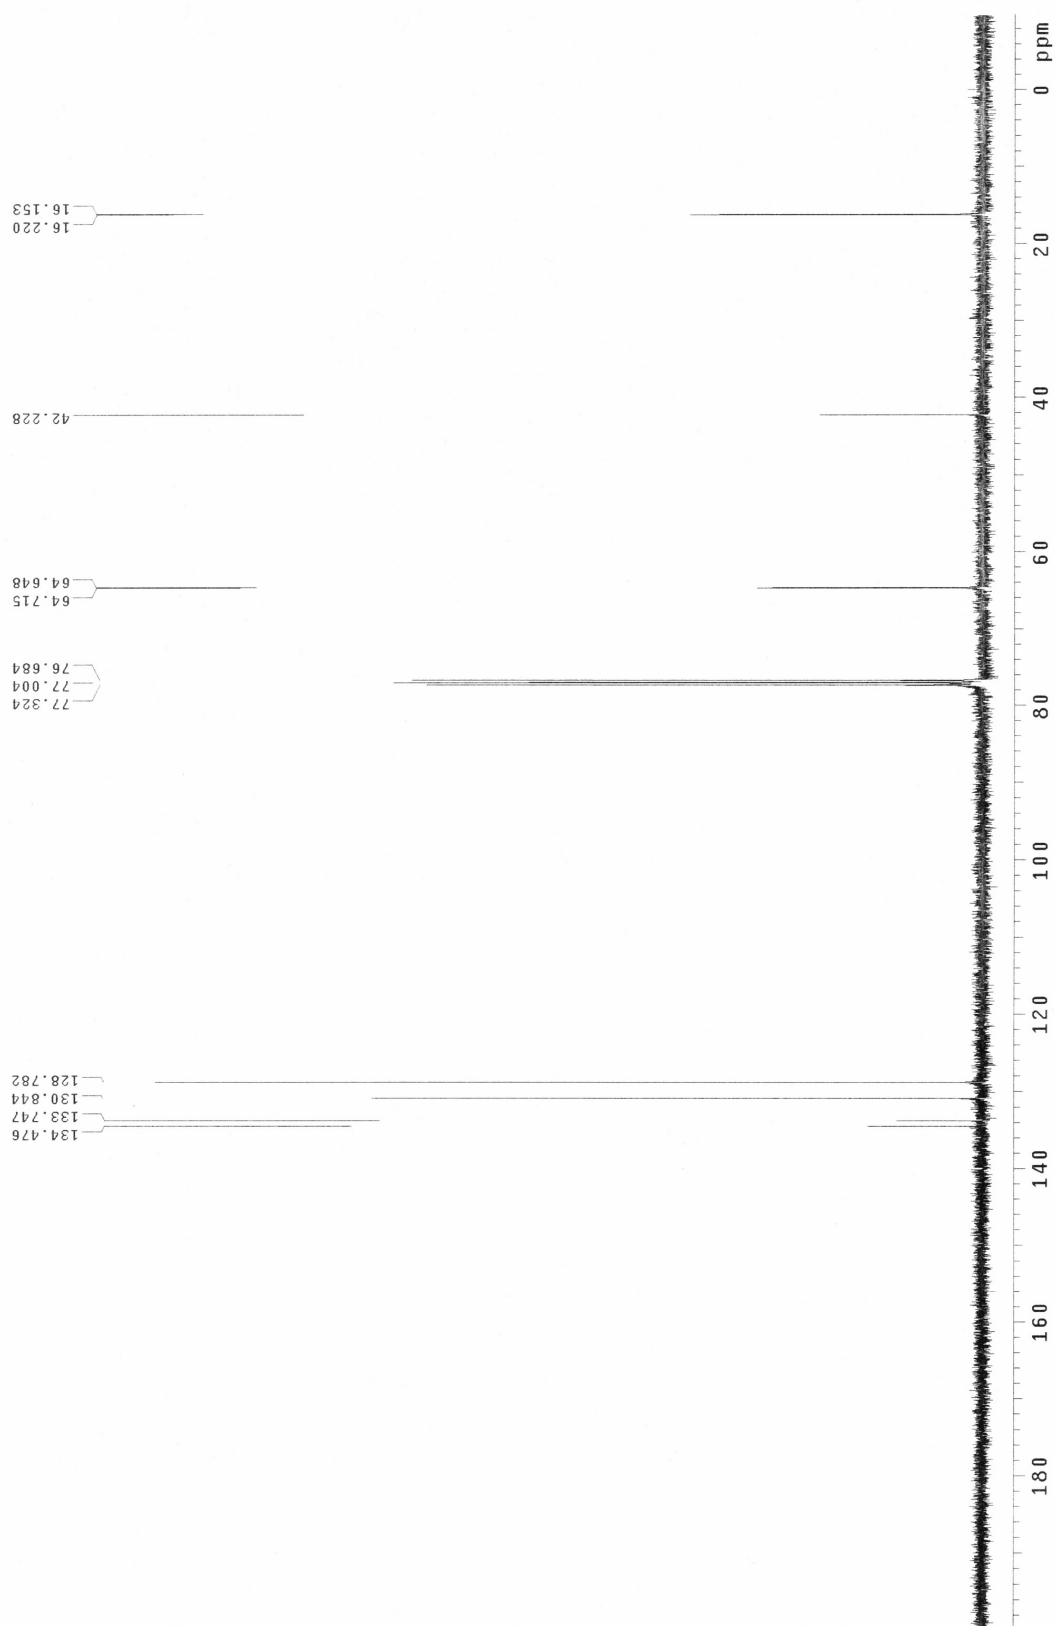

Sample: Ja-x-30-c  
Sample ID: s\_20221107\_02  
File: 0049.fid  
Pulse Sequence: s2pul



**$^{31}\text{P}$  NMR (162 MHz) in  $\text{CDCl}_3$** 

Sample: Ja-x-30-p  
File: exp

Pulse Sequence: s2pul

Solvent:  $\text{cdcl}_3$   
Temp: 25.0 C, 298.1 K  
Operator: jkang  
VNMR-400 "Varian-NMR"

Relax. delay 1.000 sec  
Pulse 45.0 degrees  
Acq. time 1.600 sec  
Width 21186.4 Hz  
10 repetitions

OBSERVE P31, 161.7720621 MHz  
DECOUPLE H1, 399.6314735 MHz

Power 40 dB  
Continuously on

Modulated

DATA PROCESSING

Time Modulating 1.0 Hz

File size 131072

Total time 0 min, 26 sec

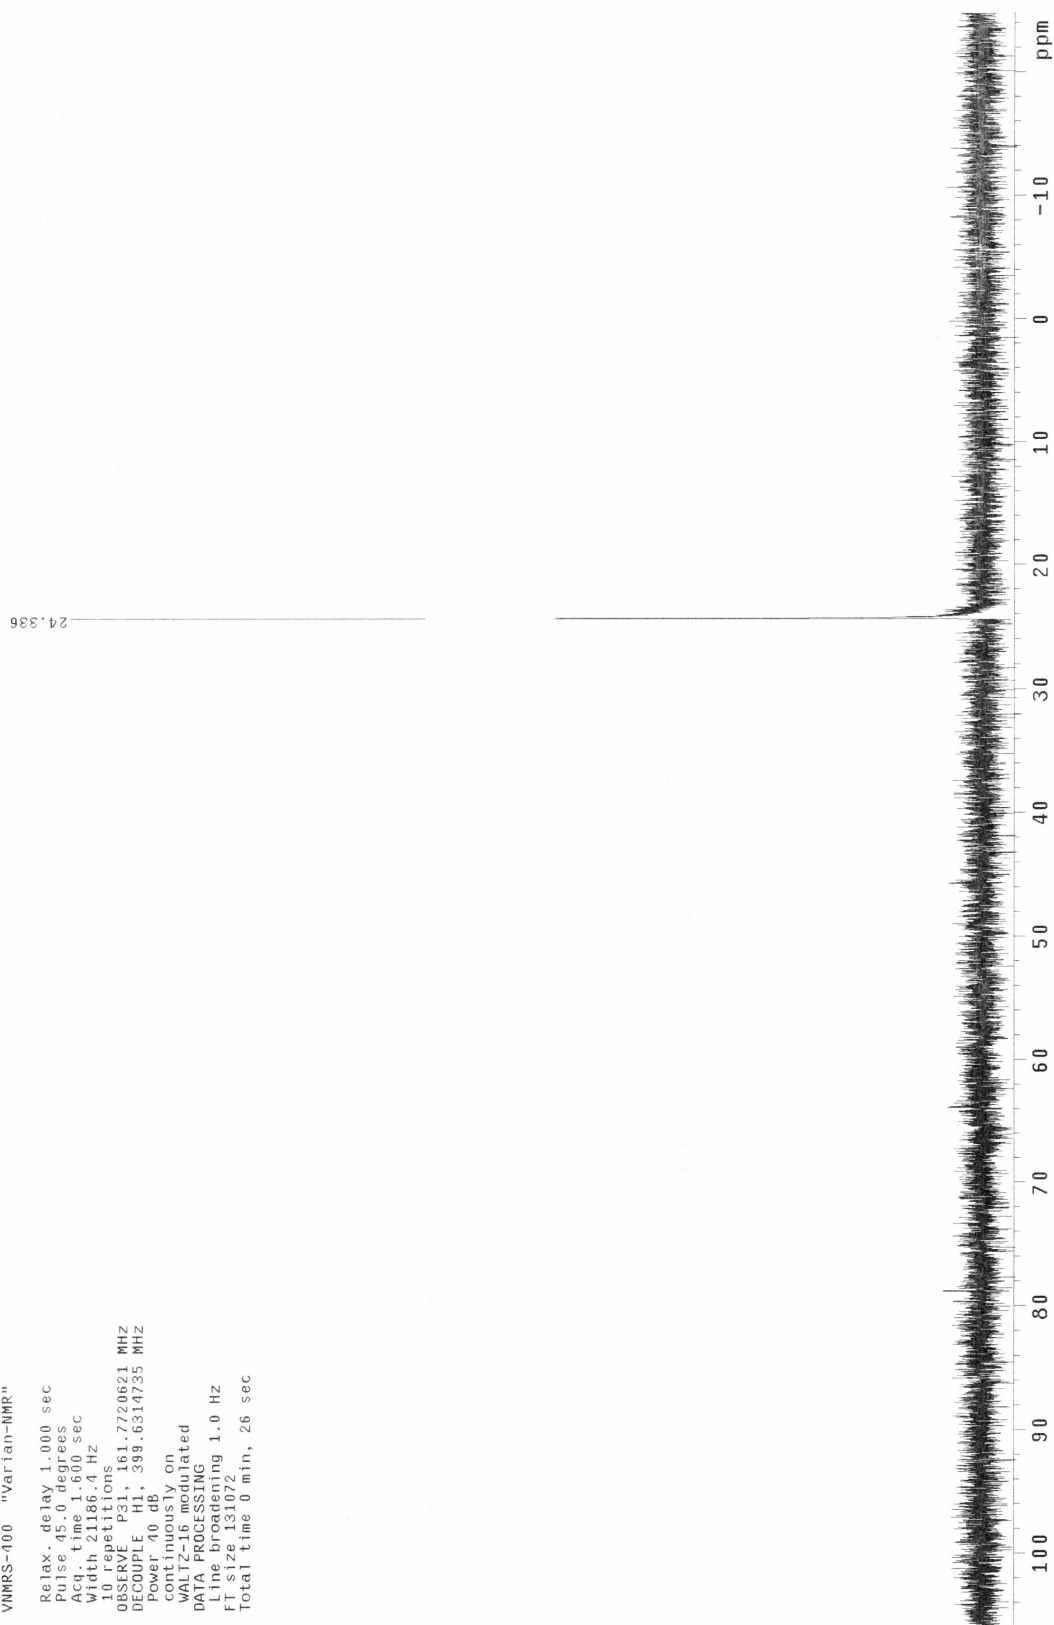



$^1\text{H}$  NMR (400 MHz) in  $\text{CDCl}_3$ 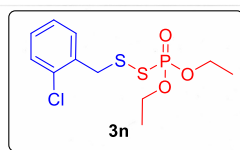

Sample: Ja-x-32-h  
Sample ID: s\_20221108\_01  
File: 0051.fid  
Pulse Sequence: s2pul

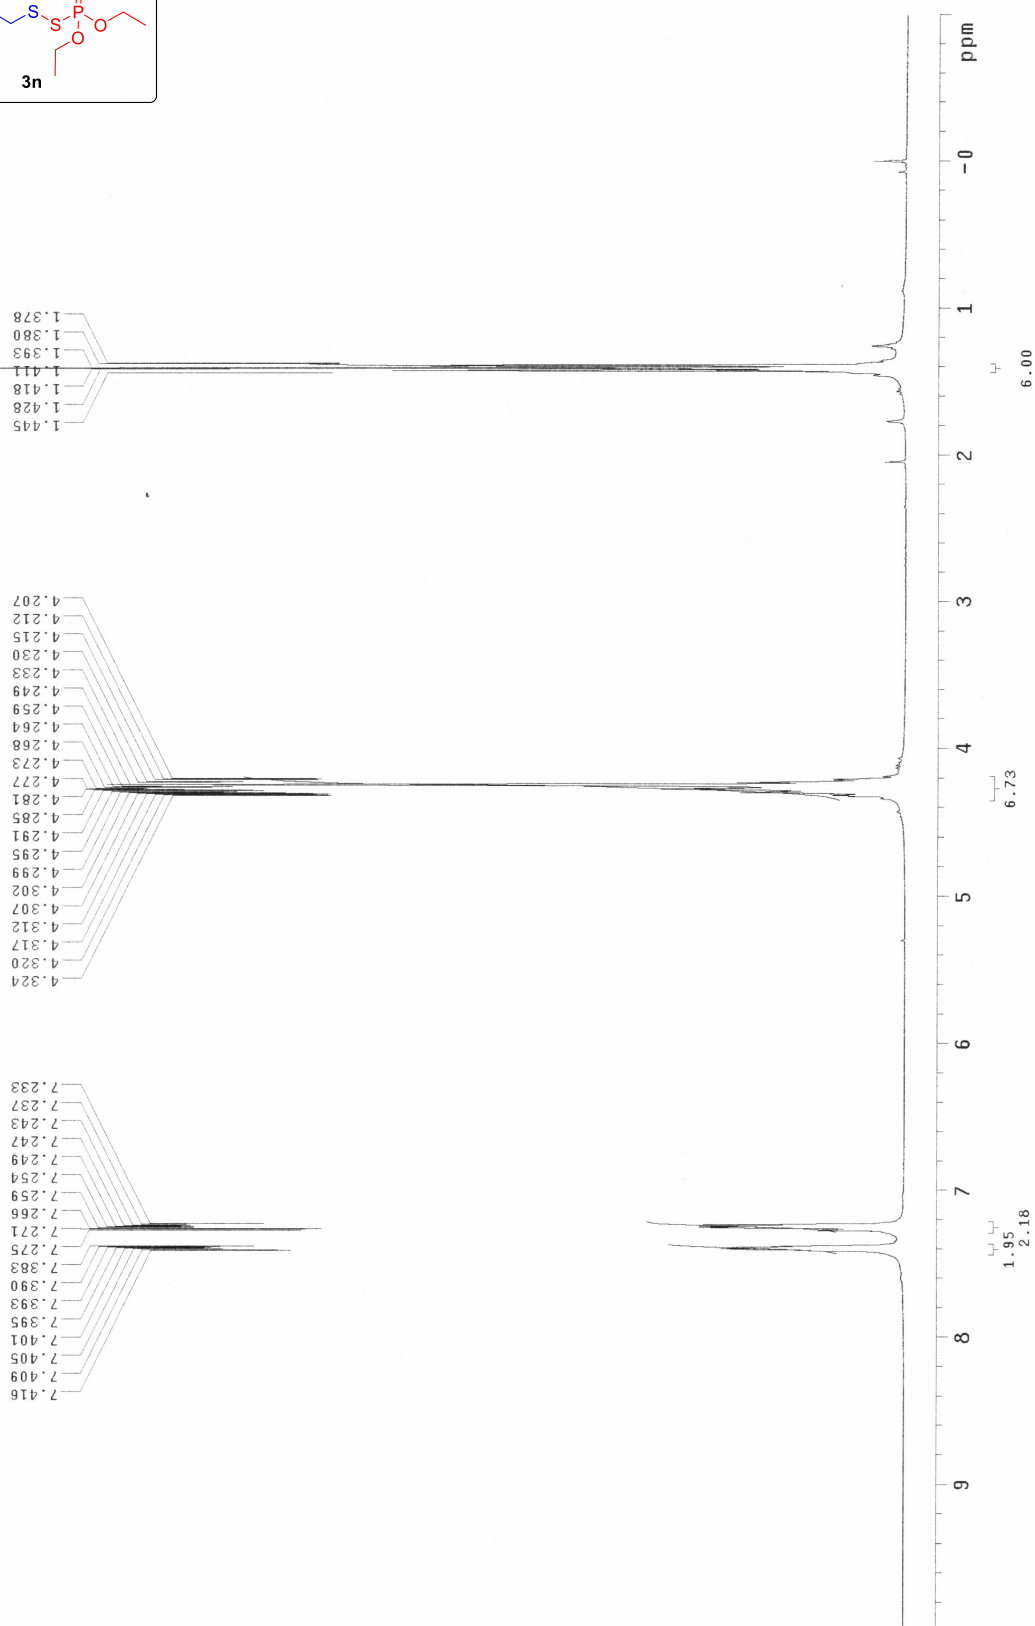



**$^{13}\text{C}$  NMR (100.5 MHz) in  $\text{CDCl}_3$** 

Sample: Ja-x-32-c  
Sample ID: s.20221108\_02  
File: 0052.fid  
Pulse Sequence: s2pul  
Solvent: cdc13  
Temp: 25.0 C / 298.1 K  
Operator: jykang  
File: 0052  
VNMR-400 "Varian-NMR"  
Relax. delay 1.000 sec  
Pulse 45.0 degrees  
Acq. time 1.300 sec  
Width 24509.8 Hz  
Sweep rate 100.000 MHz  
OBSERVE CH 13, 40.4869115 MHz  
DECOUPLE CH 1, 399.6314735 MHz  
Power 40 dB  
Continuously on  
WALTZ-16 modulated  
DATA PROCESSING  
Line broadening 0.5 Hz  
FI size 65536  
Total time 15 min, 24 sec

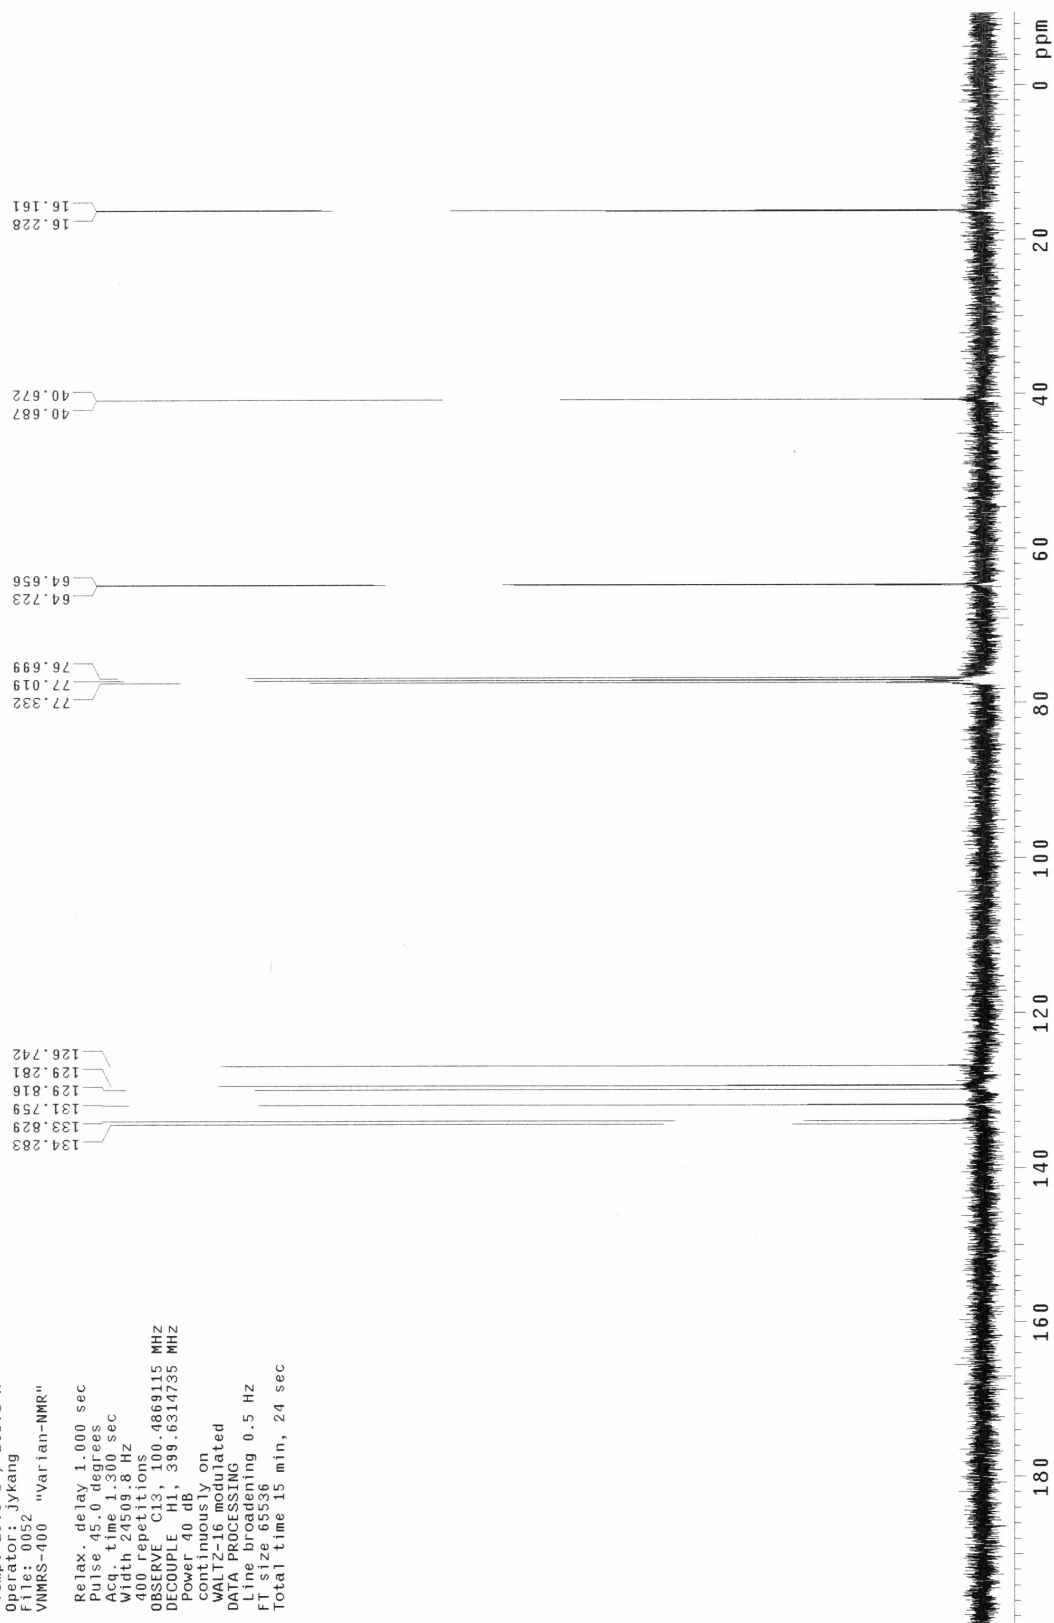



**$^{31}\text{P}$  NMR (162 MHz) in  $\text{CDCl}_3$** 

Sample: Ja-x-32-p  
File: exp  
Pulse Sequence: s2pul  
Solvent: cdc13  
Temp.: 25.0 C / 298.1 K  
Operator: Jykang  
VNMR-400 "Varian-NMR"  
Relax. delay 1.000 sec  
Pulse 45.0 degrees  
Acq. time 1.600 sec  
Width 21186.4 Hz  
10 repetitions  
OBSERVE P31, 161.7720621 MHz  
DECOUPLE H1, 399.6314735 MHz  
Power 40 dB,  
continuously on  
WALTZ-16 modulated  
DATA PROCESSING  
Line broadening 1.0 Hz  
FT size 131072  
Total time 0 min, 26 sec

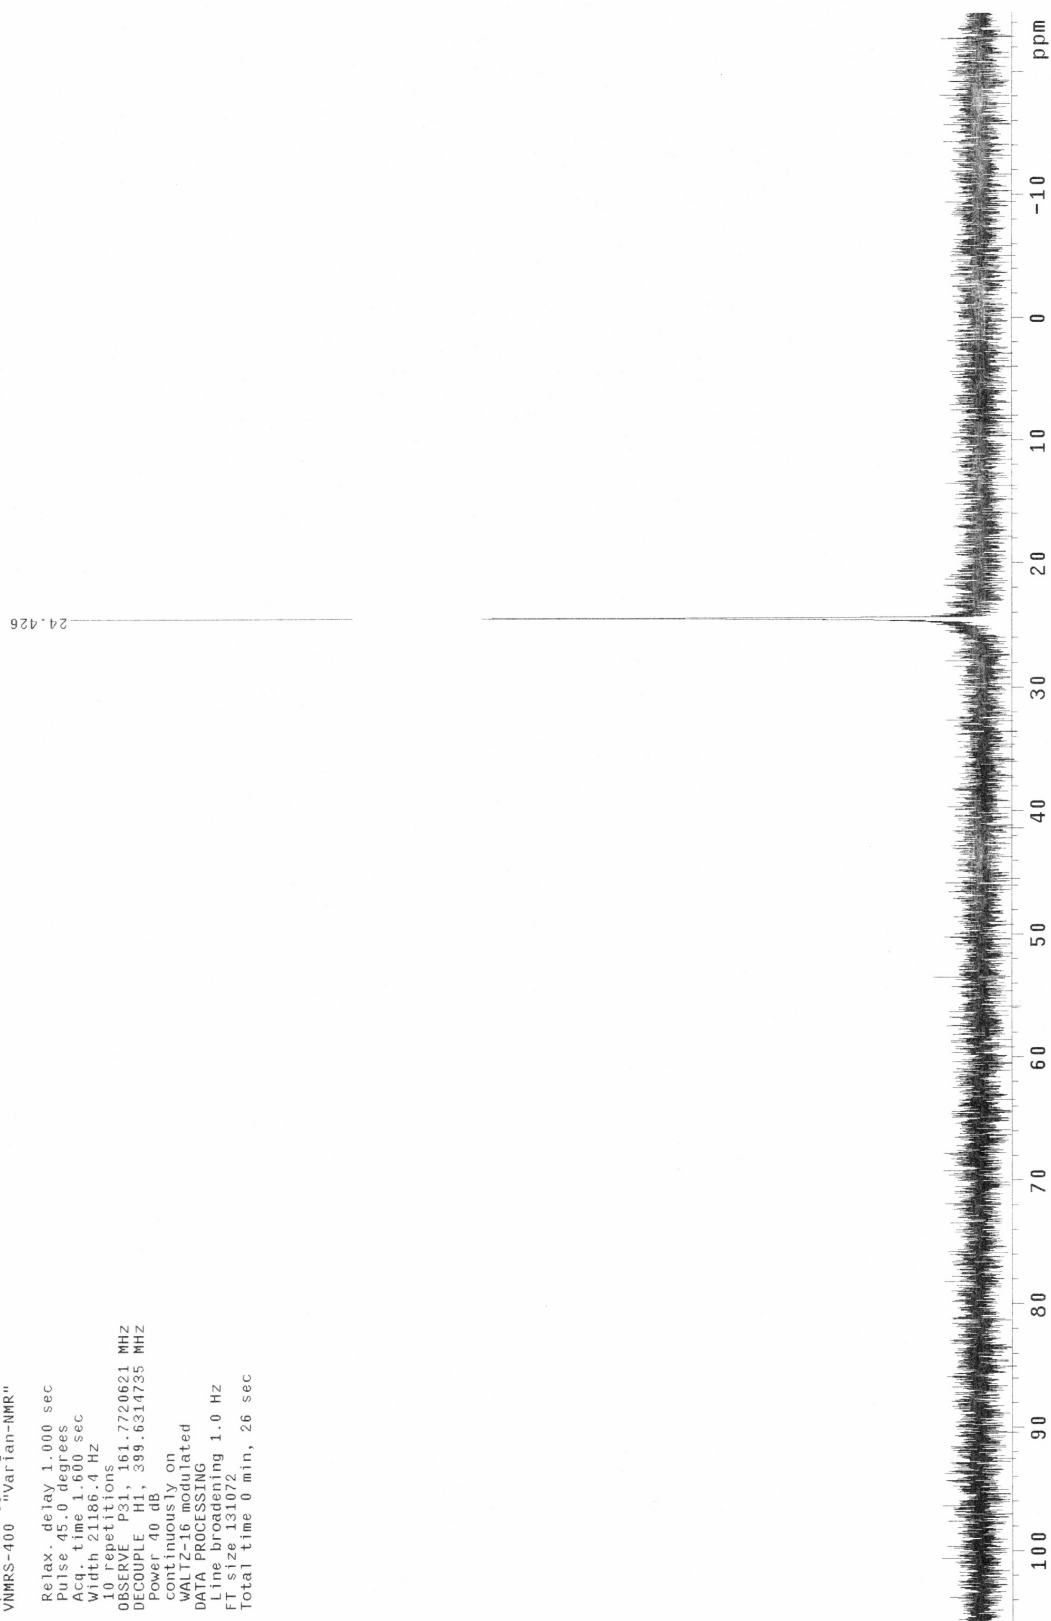



$^1\text{H}$  NMR (400 MHz) in  $\text{CDCl}_3$ 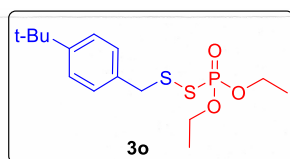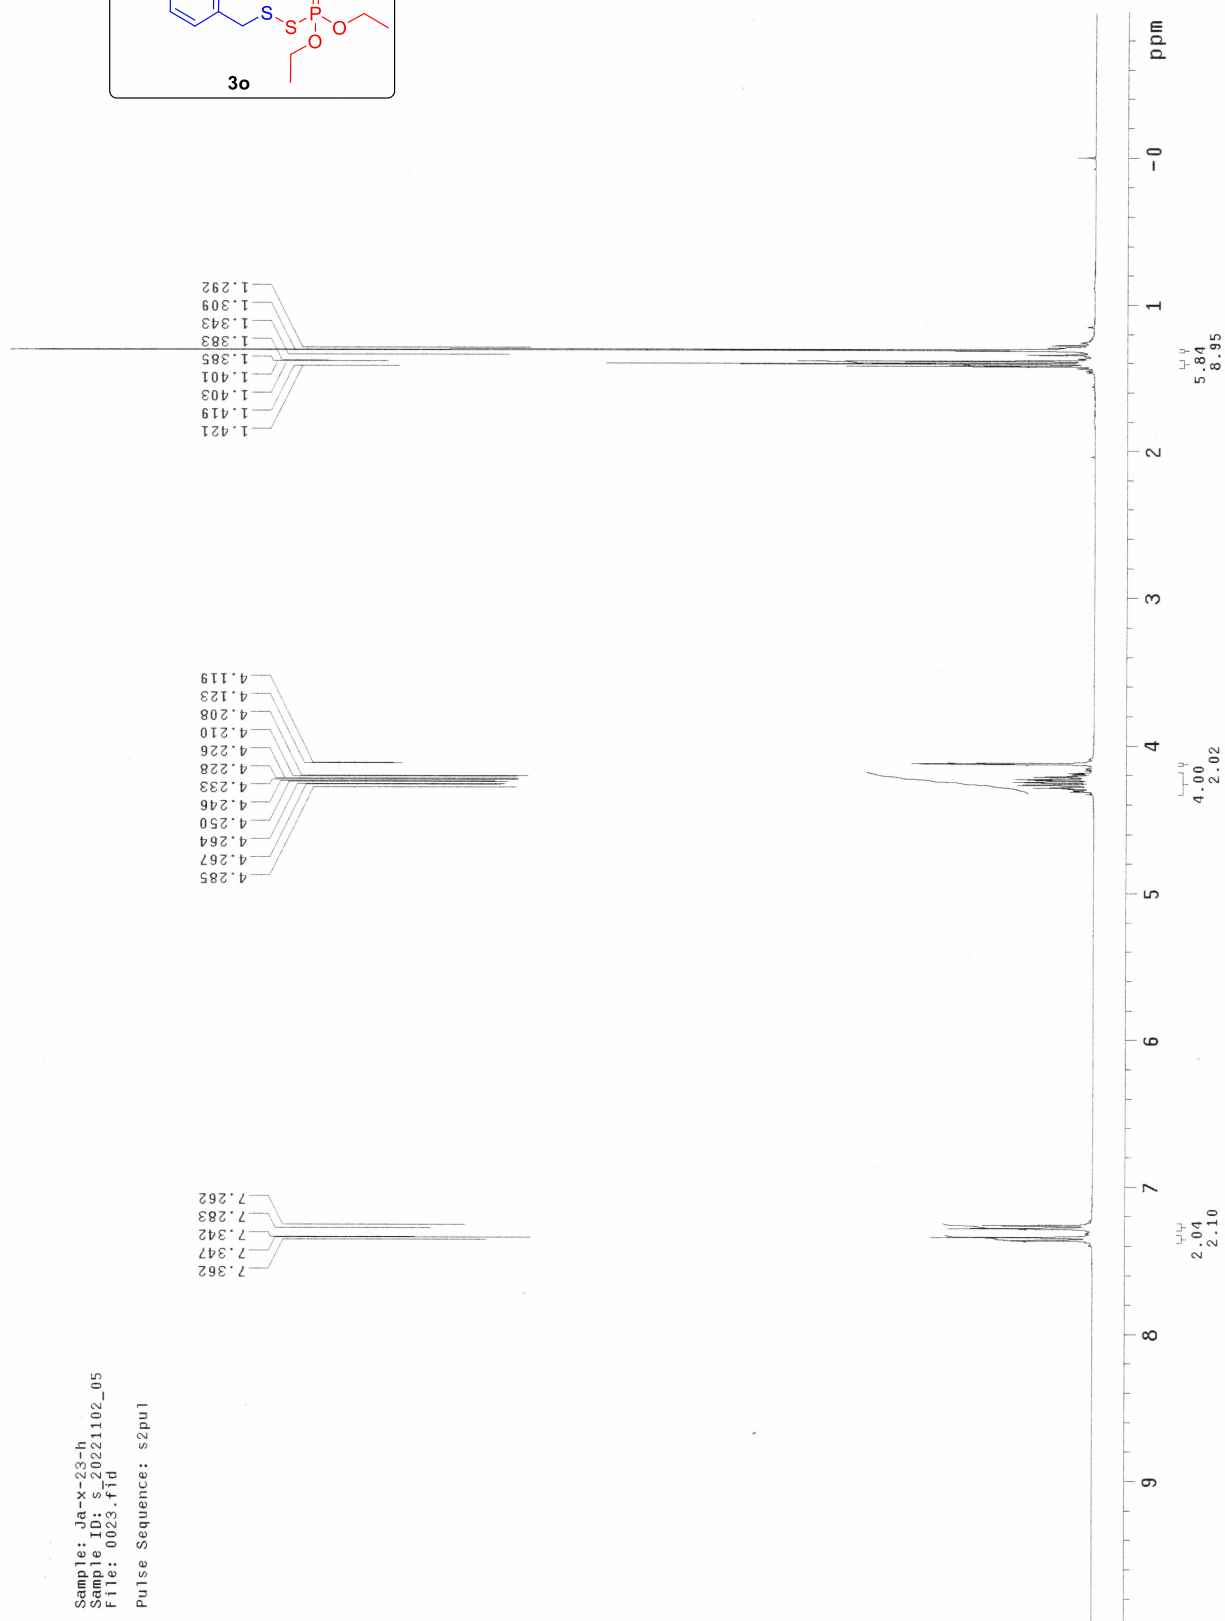

Sample: ja-x-23-h  
Sample ID: s\_20221102\_05  
File: 0023.fid  
Pulse Sequence: s2pul



**$^{13}\text{C}$  NMR (100.5 MHz) in  $\text{CDCl}_3$** 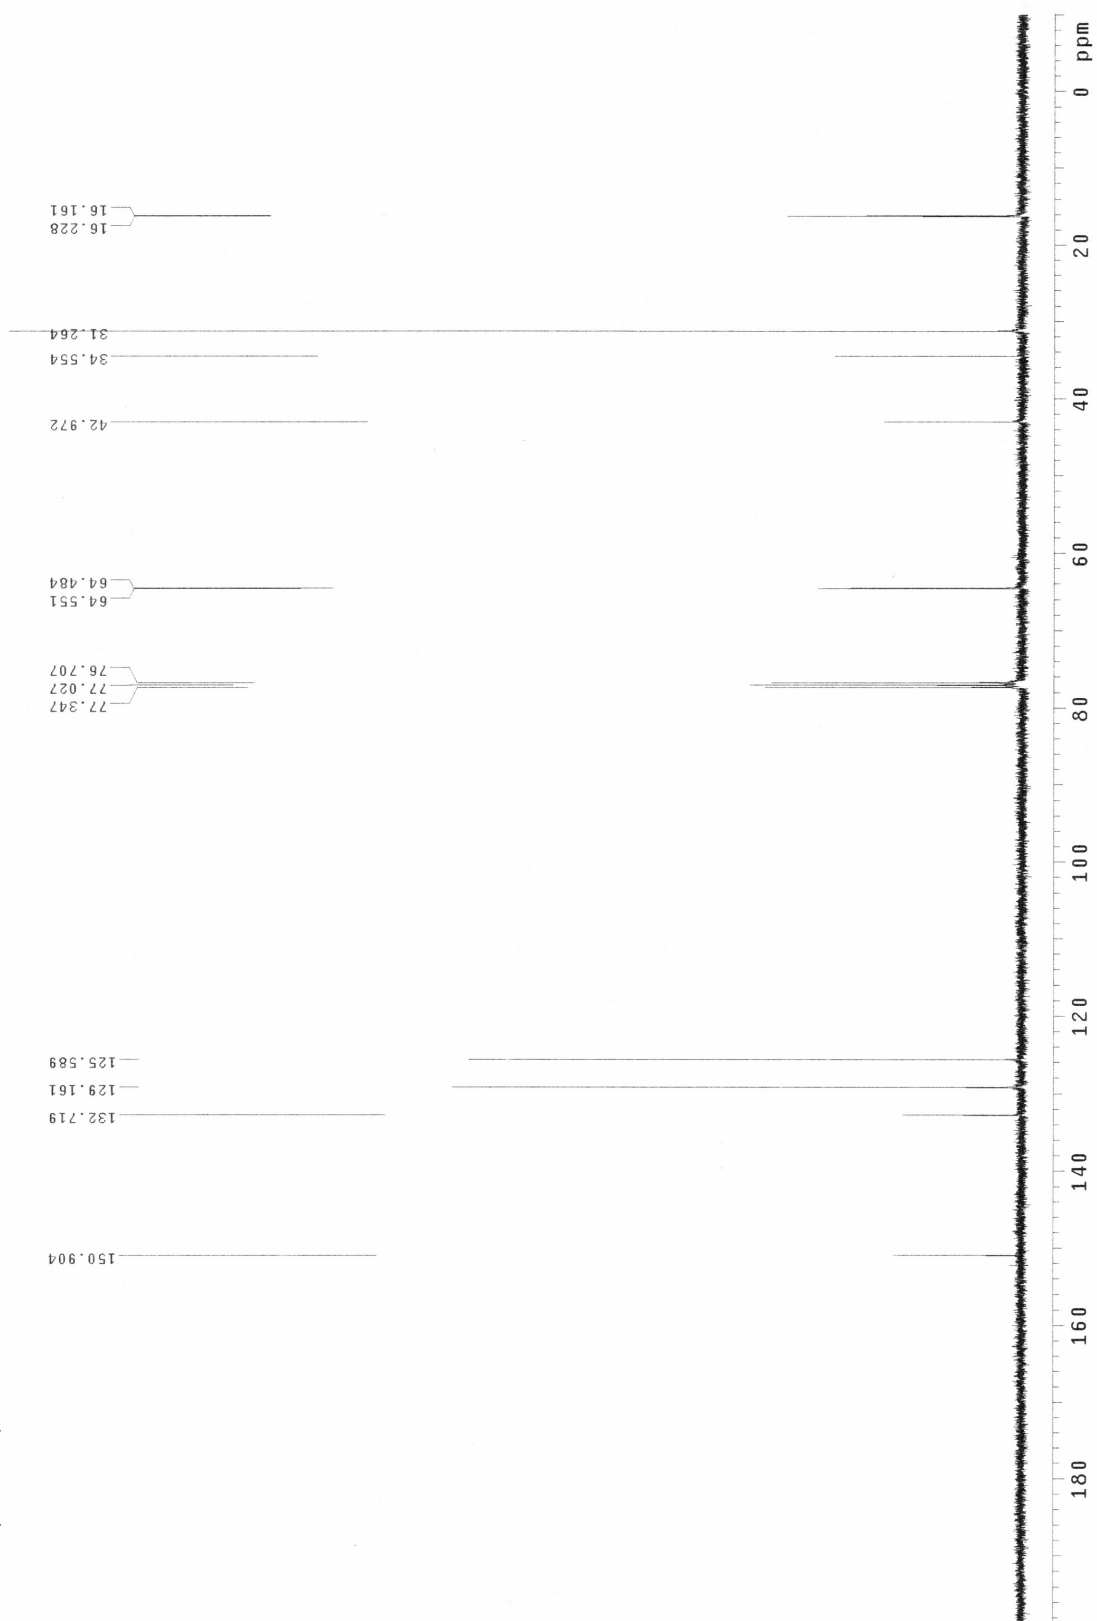

Sample: Ja-x-23-c  
Sample ID: s\_20221102\_06  
File: 0024.fid  
Pulse Sequence: s2pul



**$^{31}\text{P}$  NMR (162 MHz) in  $\text{CDCl}_3$** 

Sample: Ja-x-23-p  
File: exp  
Pulse Sequence: s2pul  
Solvent: cdc13  
Temp: 25.0 C / 298.1 K  
Operator: Jykang  
VNMR-400 "Varian-NMR"  
Relax. delay 1.000 sec  
Pulse 45.0 degrees  
Acq. time 1.600 sec  
Width 21186.4 Hz  
10 repetitions  
OBSERVE P31, 161.7720621 MHz  
DECOUPLE H1, 399.6314735 MHz  
Power 40 dB  
continuously on  
WALTZ-16 modulated  
DATA PROCESSING  
Line broadening 1.0 Hz  
FT size 131072  
Total time 0 min, 26 sec

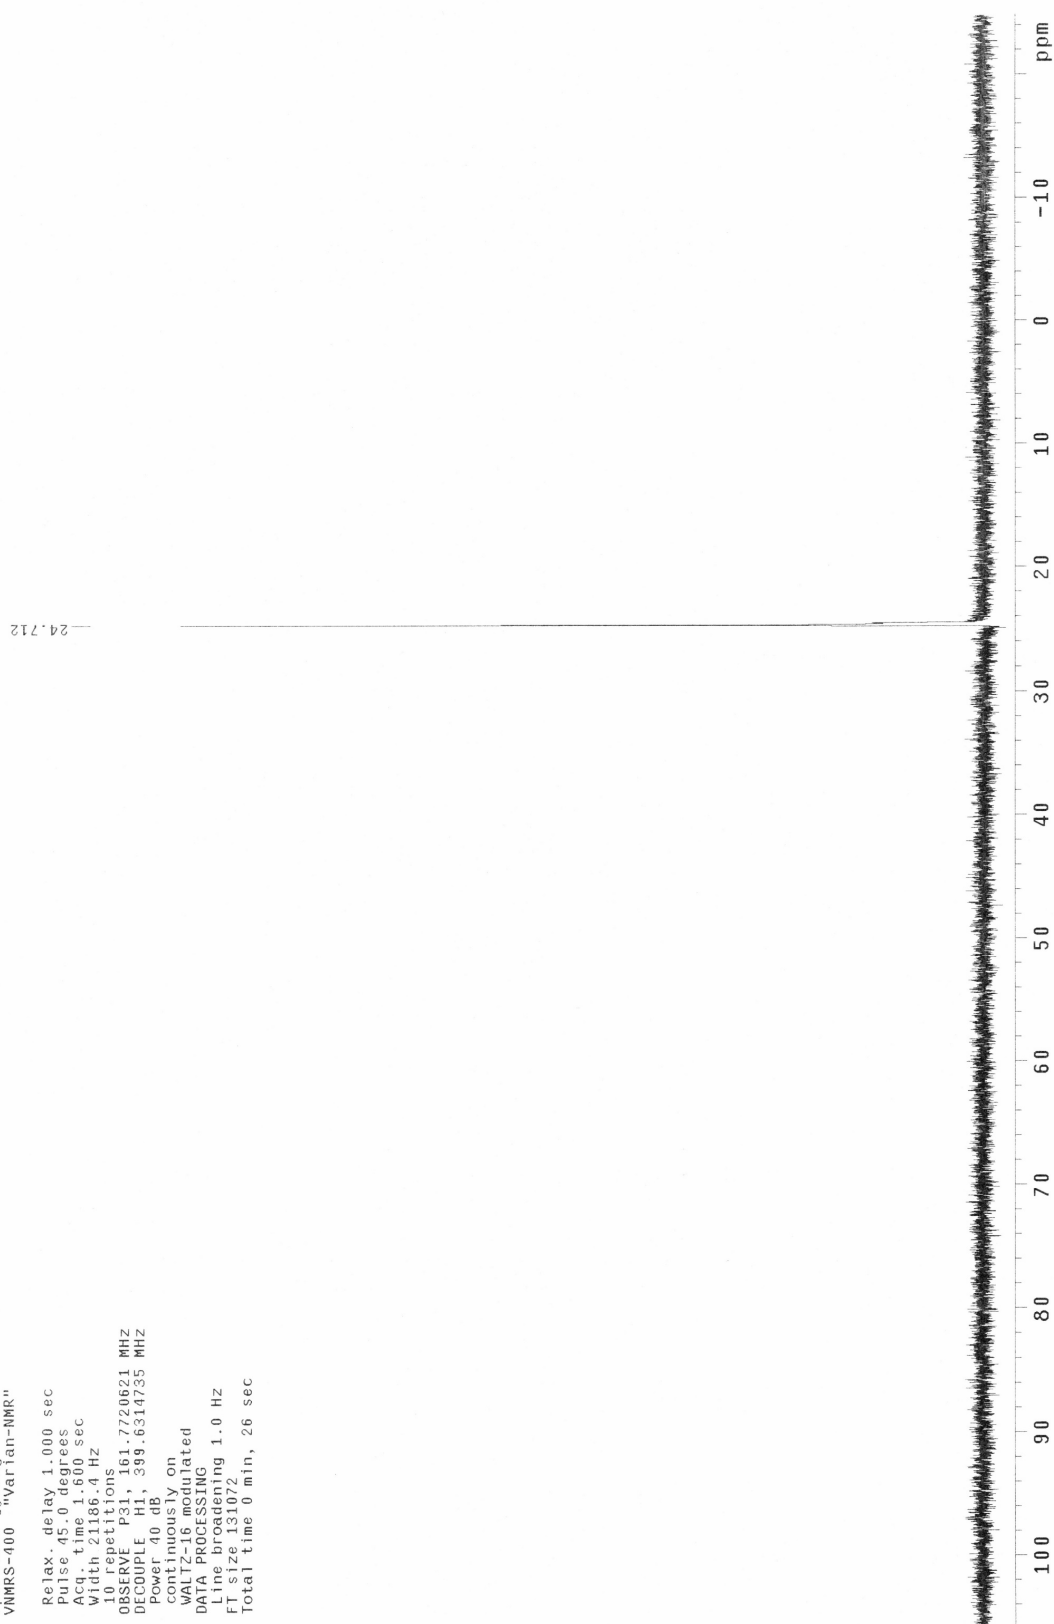



**$^1\text{H}$  NMR (400 MHz) in  $\text{CDCl}_3$** 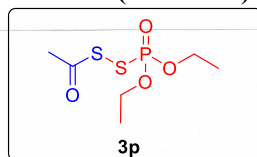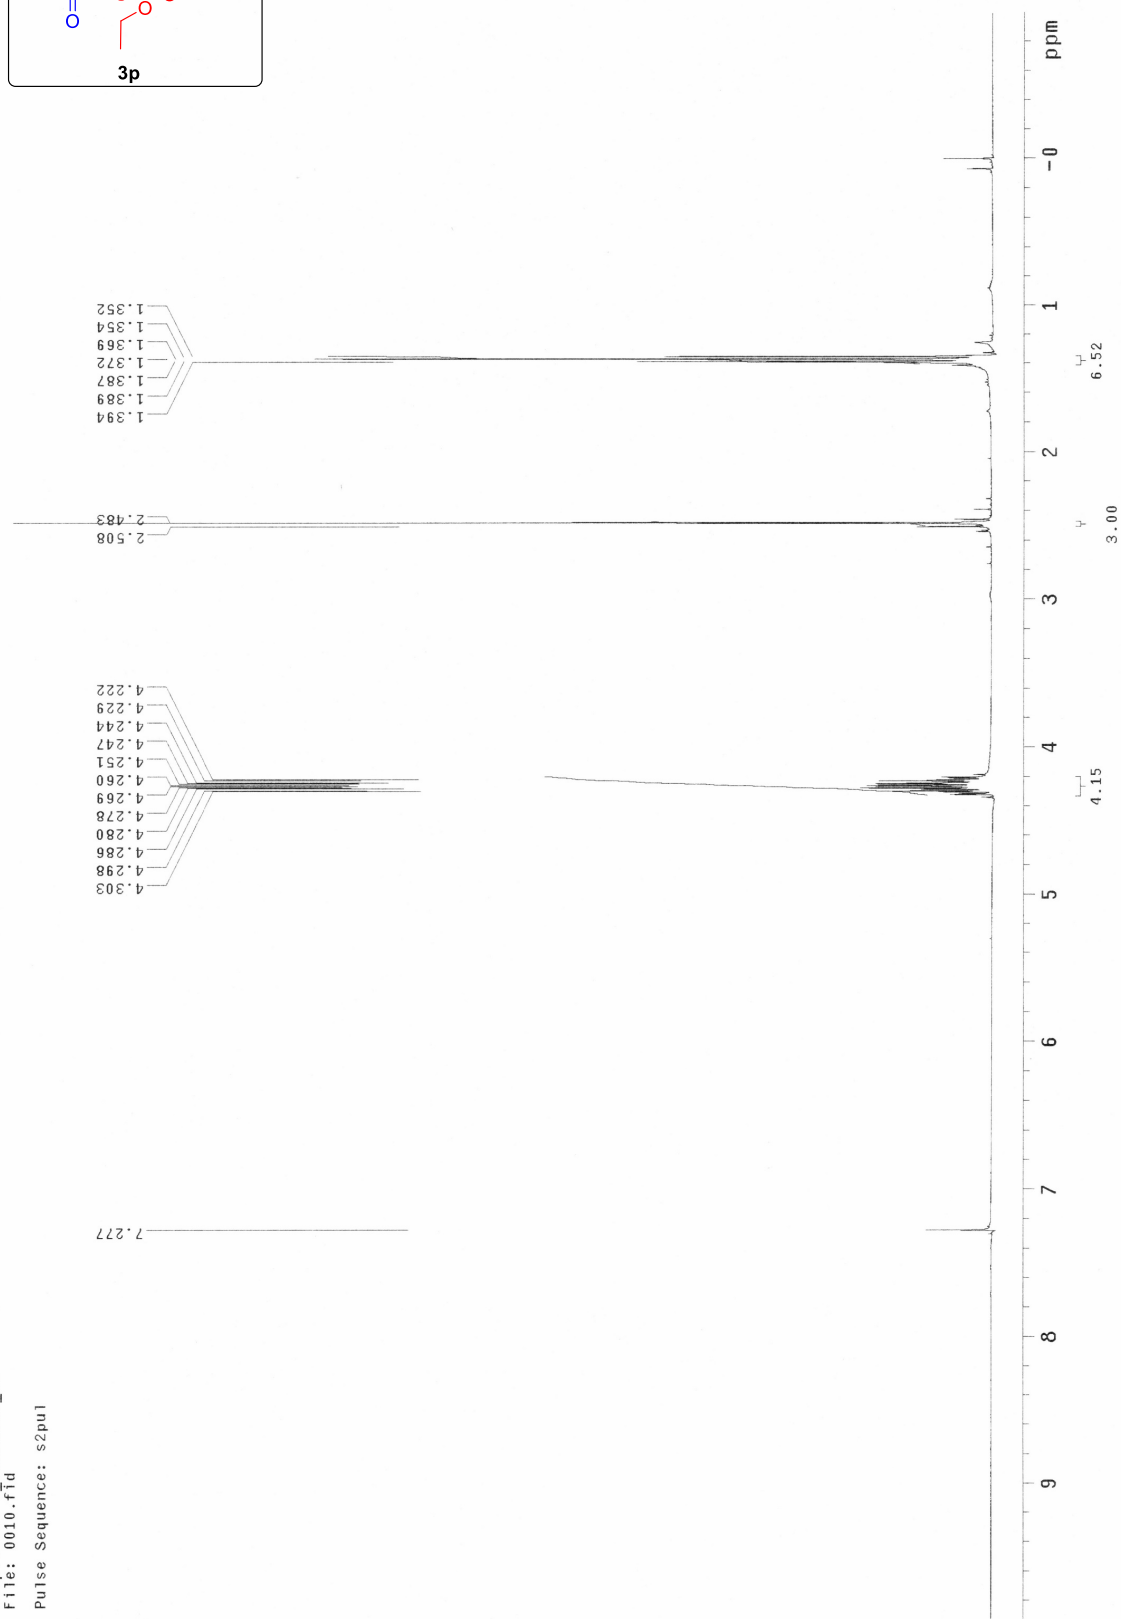

Sample: Ja-x-15-b  
Sample ID: S\_20221031\_01  
File: 0010.fid  
Pulse Sequence: s2pul



**$^{13}\text{C}$  NMR (100.5 MHz) in  $\text{CDCl}_3$** 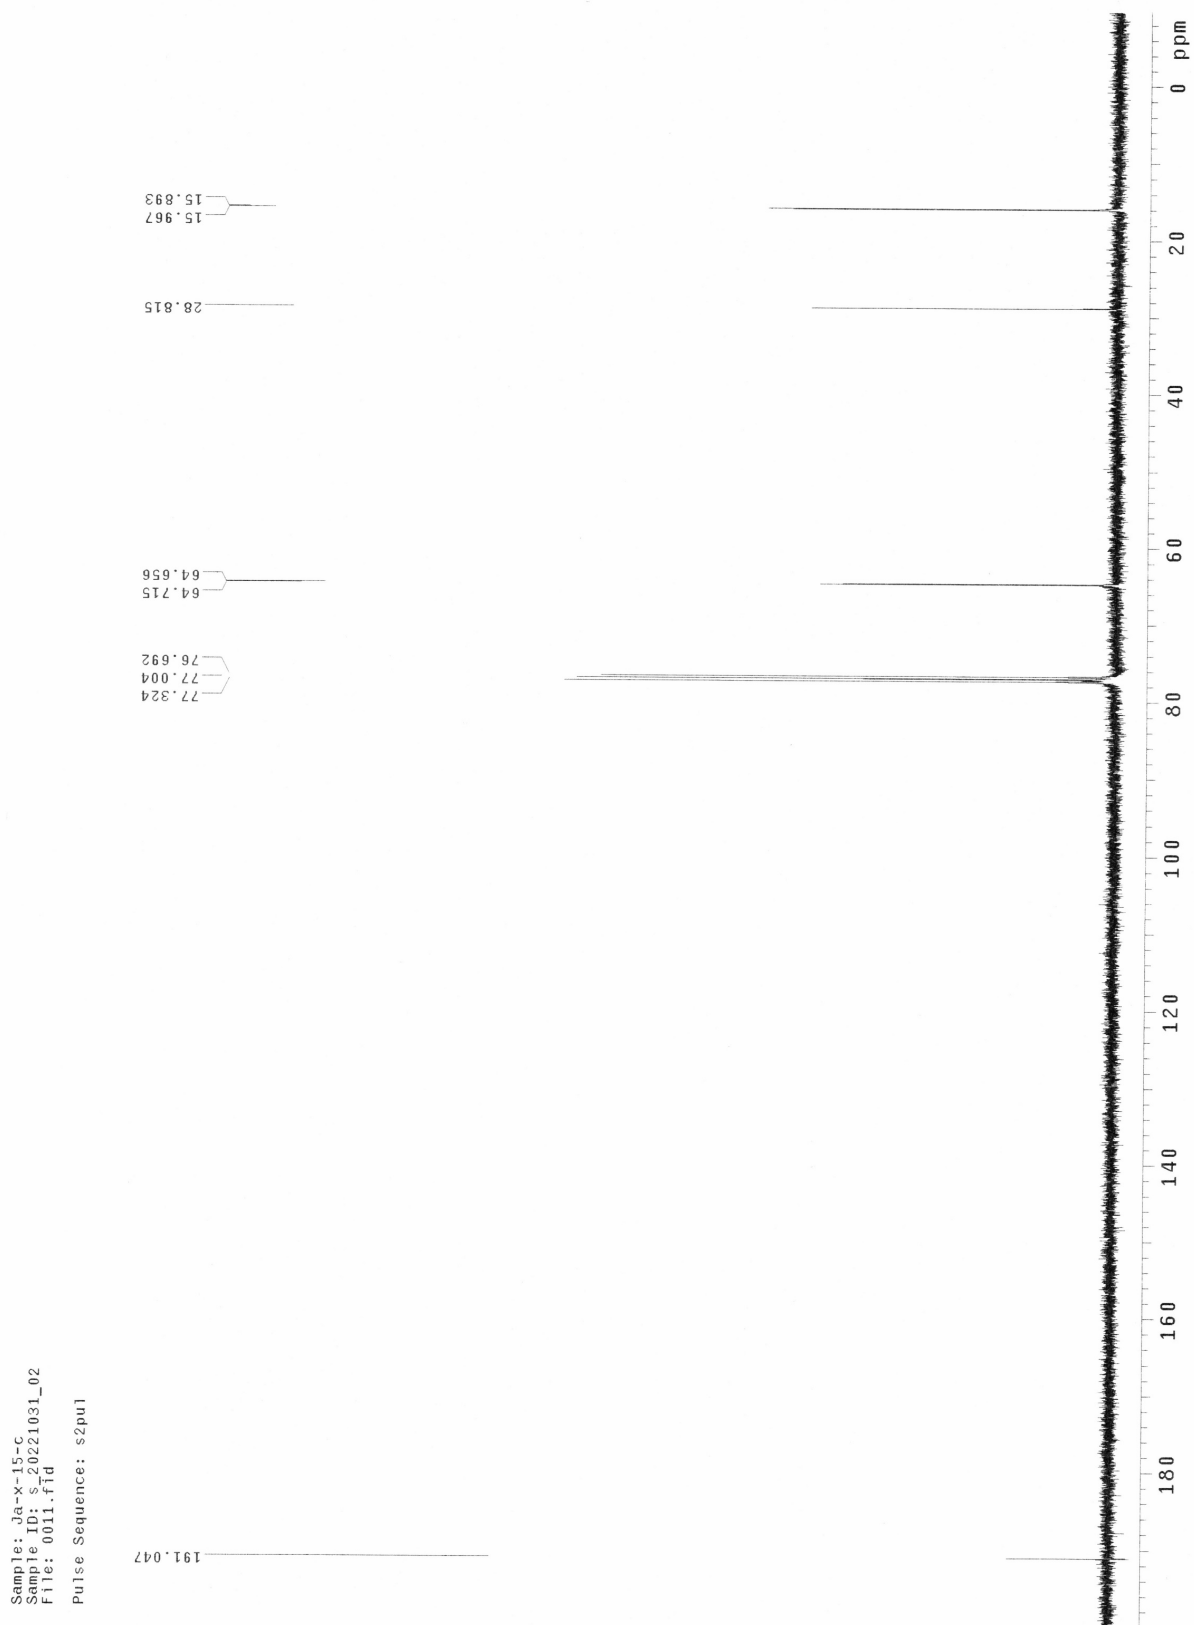



**$^{31}\text{P}$  NMR (162 MHz) in  $\text{CDCl}_3$** 

Sample: Ja-x-15-p  
File: exp  
Pulse Sequence: s2pul  
Solvent: cd3od  
Temp. 25.0 C / 298.1 K  
Operator: Jykang  
VNMR-400 "Varian-NMR"  
Relax. delay 1.000 sec  
Pulse 45.0 degrees  
Acq. time 1.600 sec  
Width 21186.4 Hz  
10 repetitions  
OBSERVE P31, 161.7710681 MHz  
DECOUPLE H1, 399.6200193 MHz  
Power 40 dB  
continuously on  
WALTZ-16 modulated  
DATA PROCESSING  
Line broadening 1.0 Hz  
FT size 131072  
Total time 0 min, 26 sec

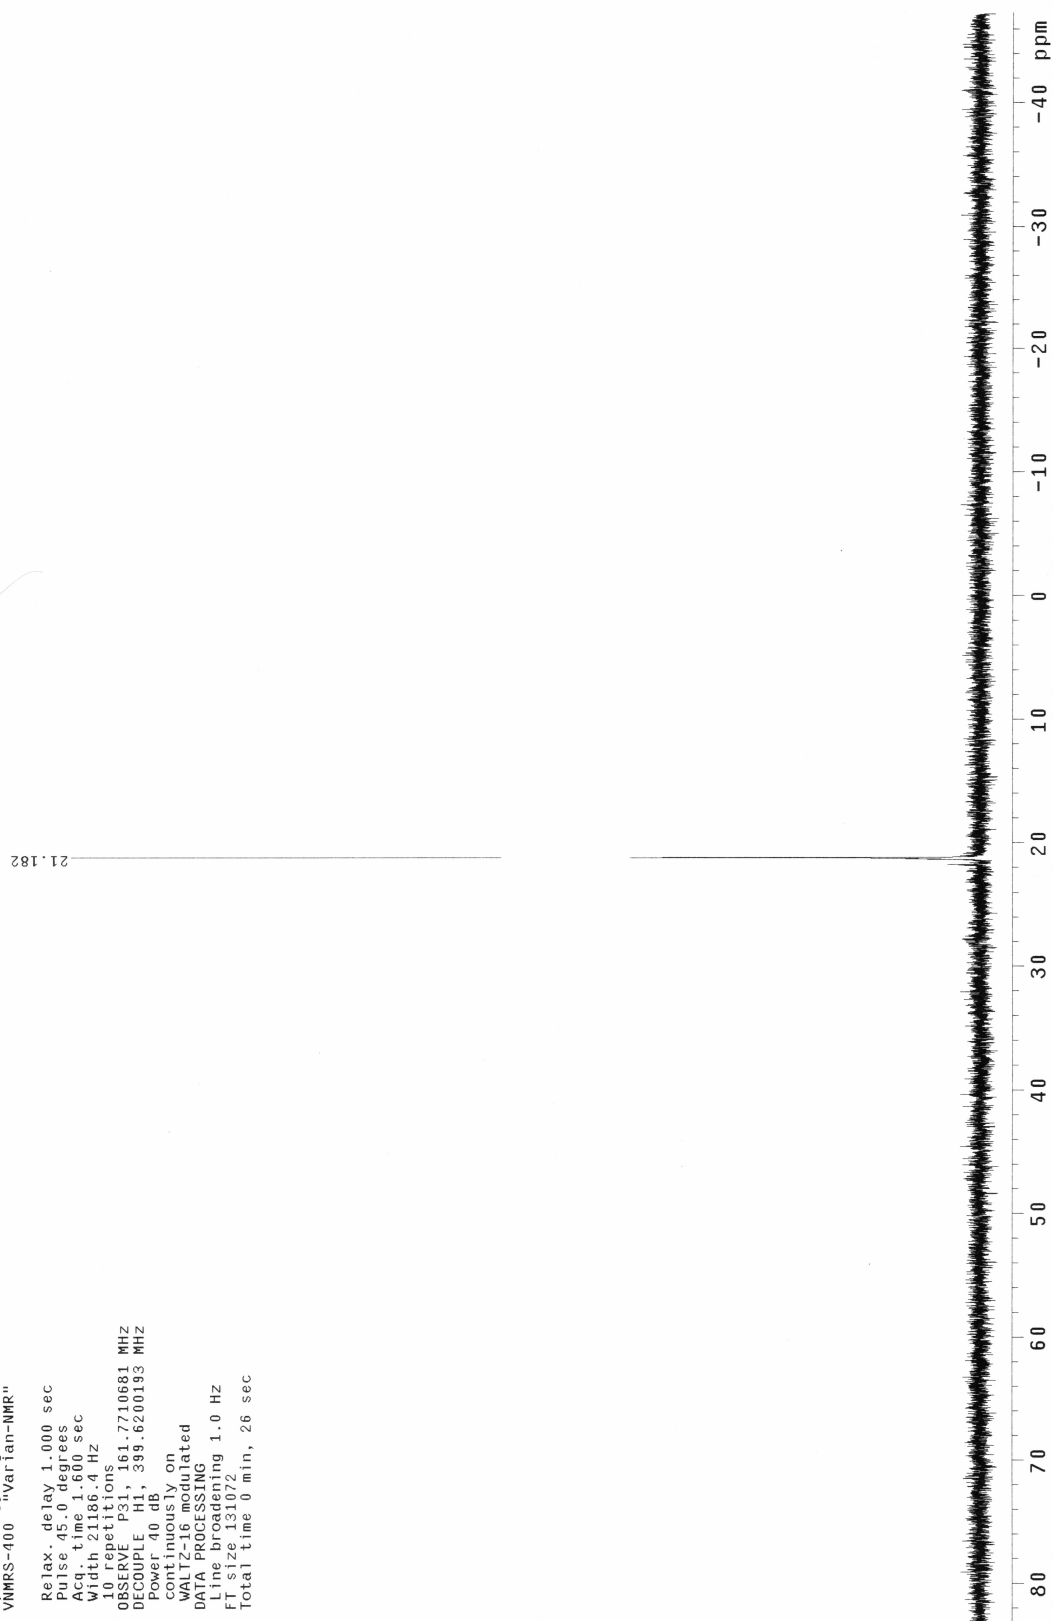



$^1\text{H}$  NMR (400 MHz) in  $\text{CDCl}_3$ 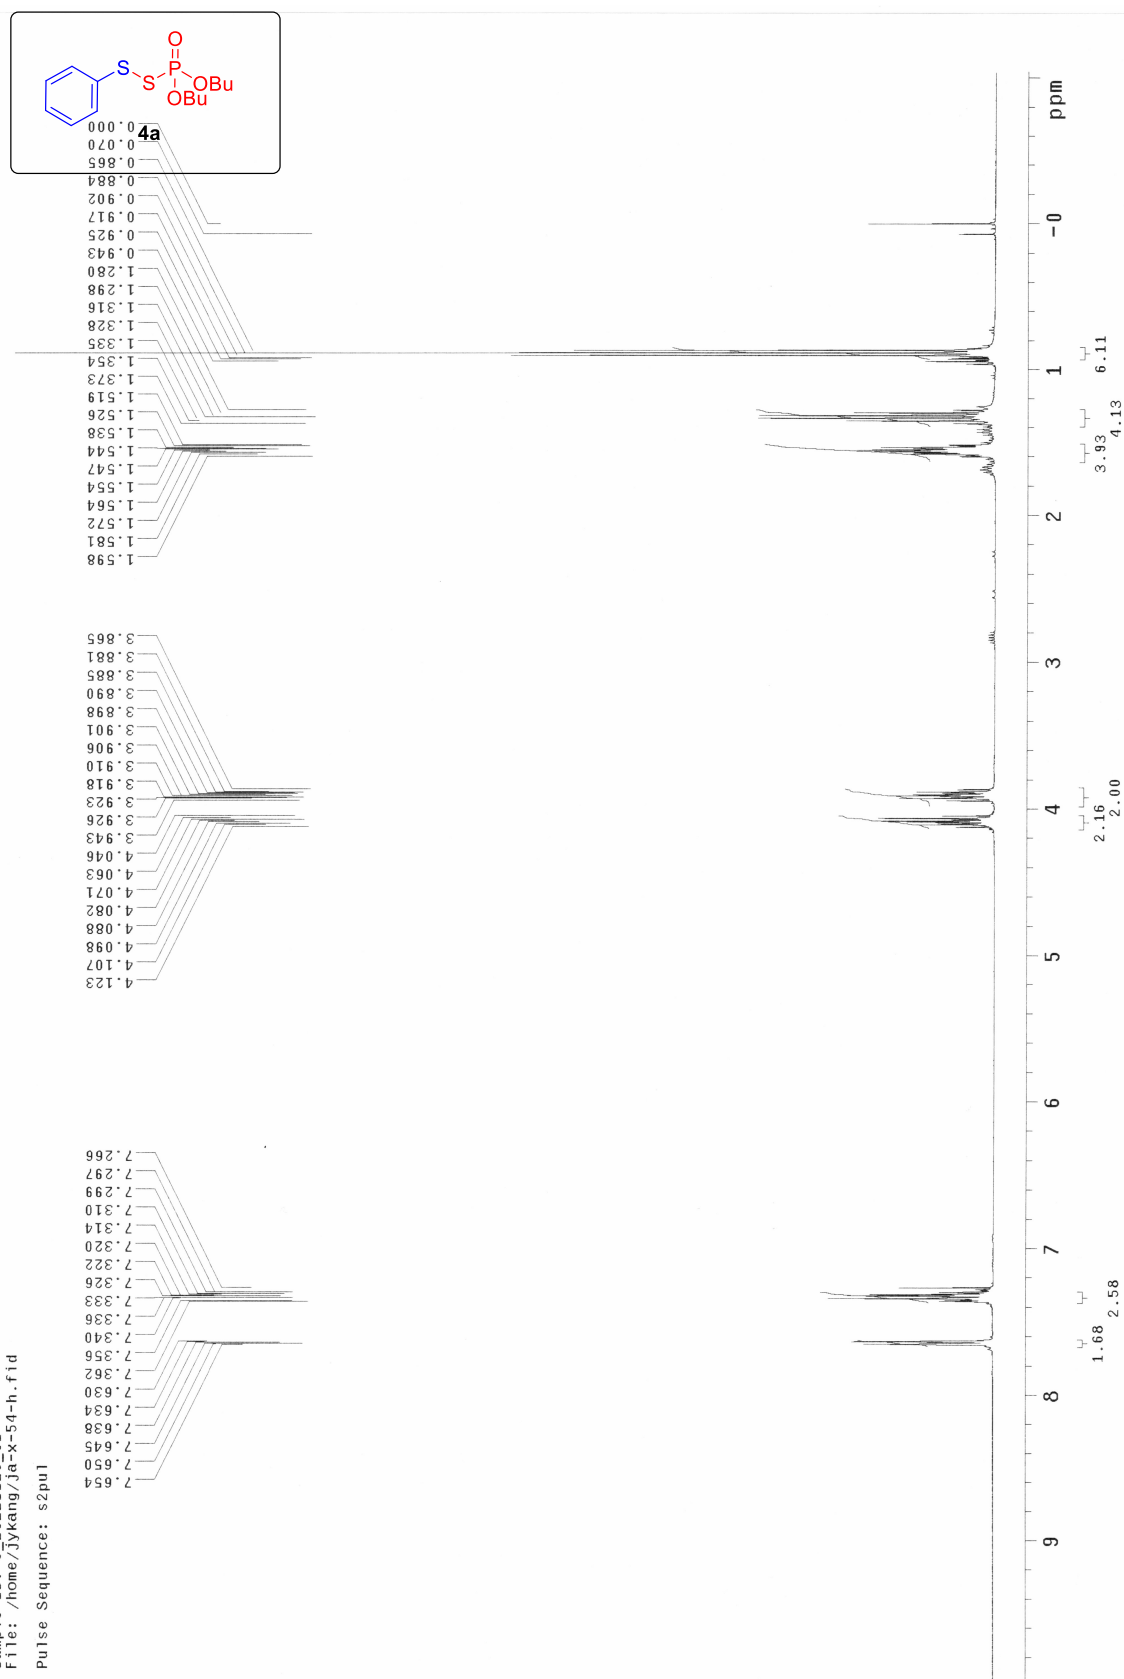



**$^{13}\text{C}$  NMR (100.5 MHz) in  $\text{CDCl}_3$** 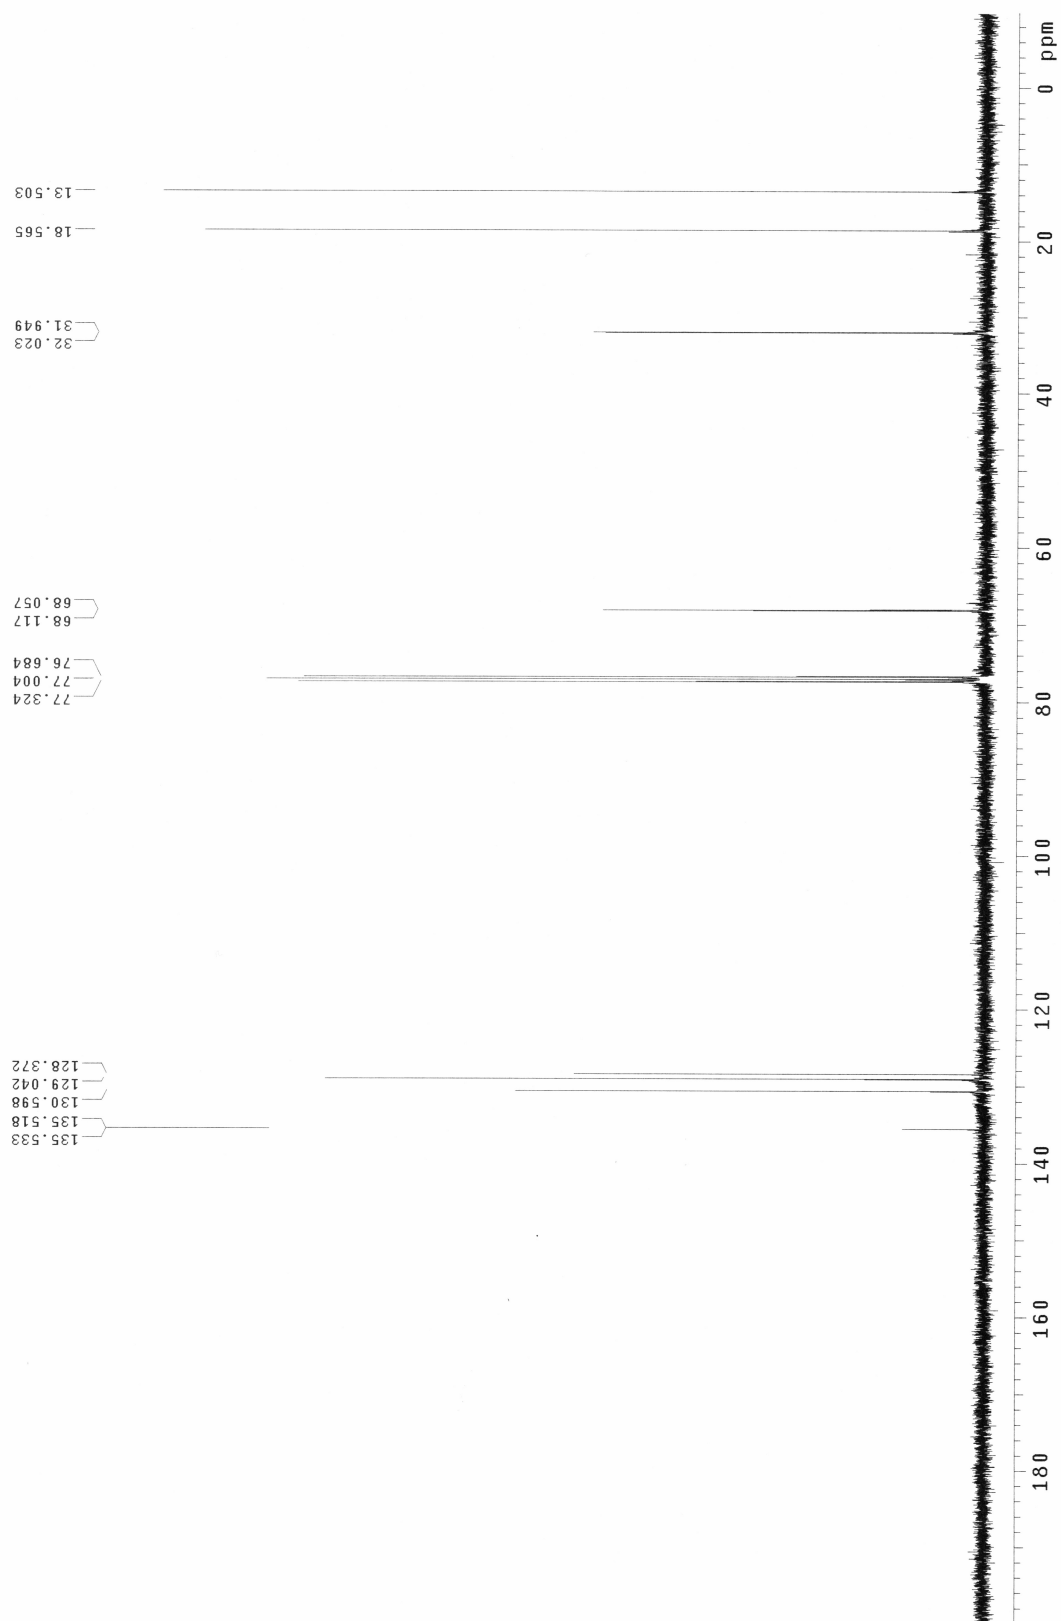

Sample: ja-x-54-c  
Sample ID: S\_20221129\_02  
File: /home/jykang/ja-x-54-c.fid  
Pulse Sequence: s2pu1



**$^{31}\text{P}$  NMR (162 MHz) in  $\text{CDCl}_3$** 

Sample: Ja-x-54-p  
File: exp

Pulse Sequence: s2pul

Solvent: cd3od  
Temp. 25.0 C / 298.1 K  
Operator: Jykang  
VNMRK-400 "Varian-NMR"

Relax. delay 1.000 sec  
Pulse 45.0 degrees  
Acq. time 1.600 sec  
Width 21186.4 Hz

10 repetitions  
OBSERVE P31, 161.7710681 MHz  
DECOUPLE H1, 399.6200193 MHz  
Power 40 dB  
continuously on  
WALTZ-16 modulated  
DATA PROCESSING  
Line broadening 1.0 Hz  
FT size 131072  
Total time 0 min, 26 sec

23.286

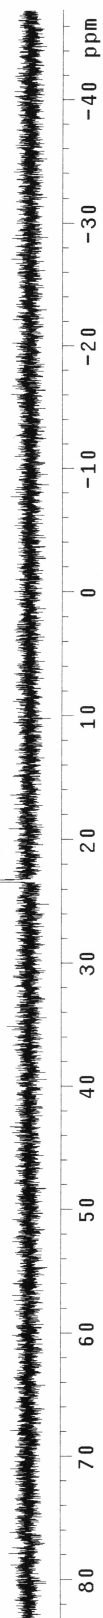



$^1\text{H}$  NMR (400 MHz) in  $\text{CDCl}_3$ 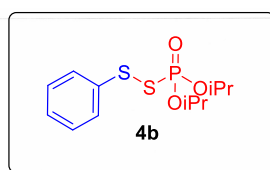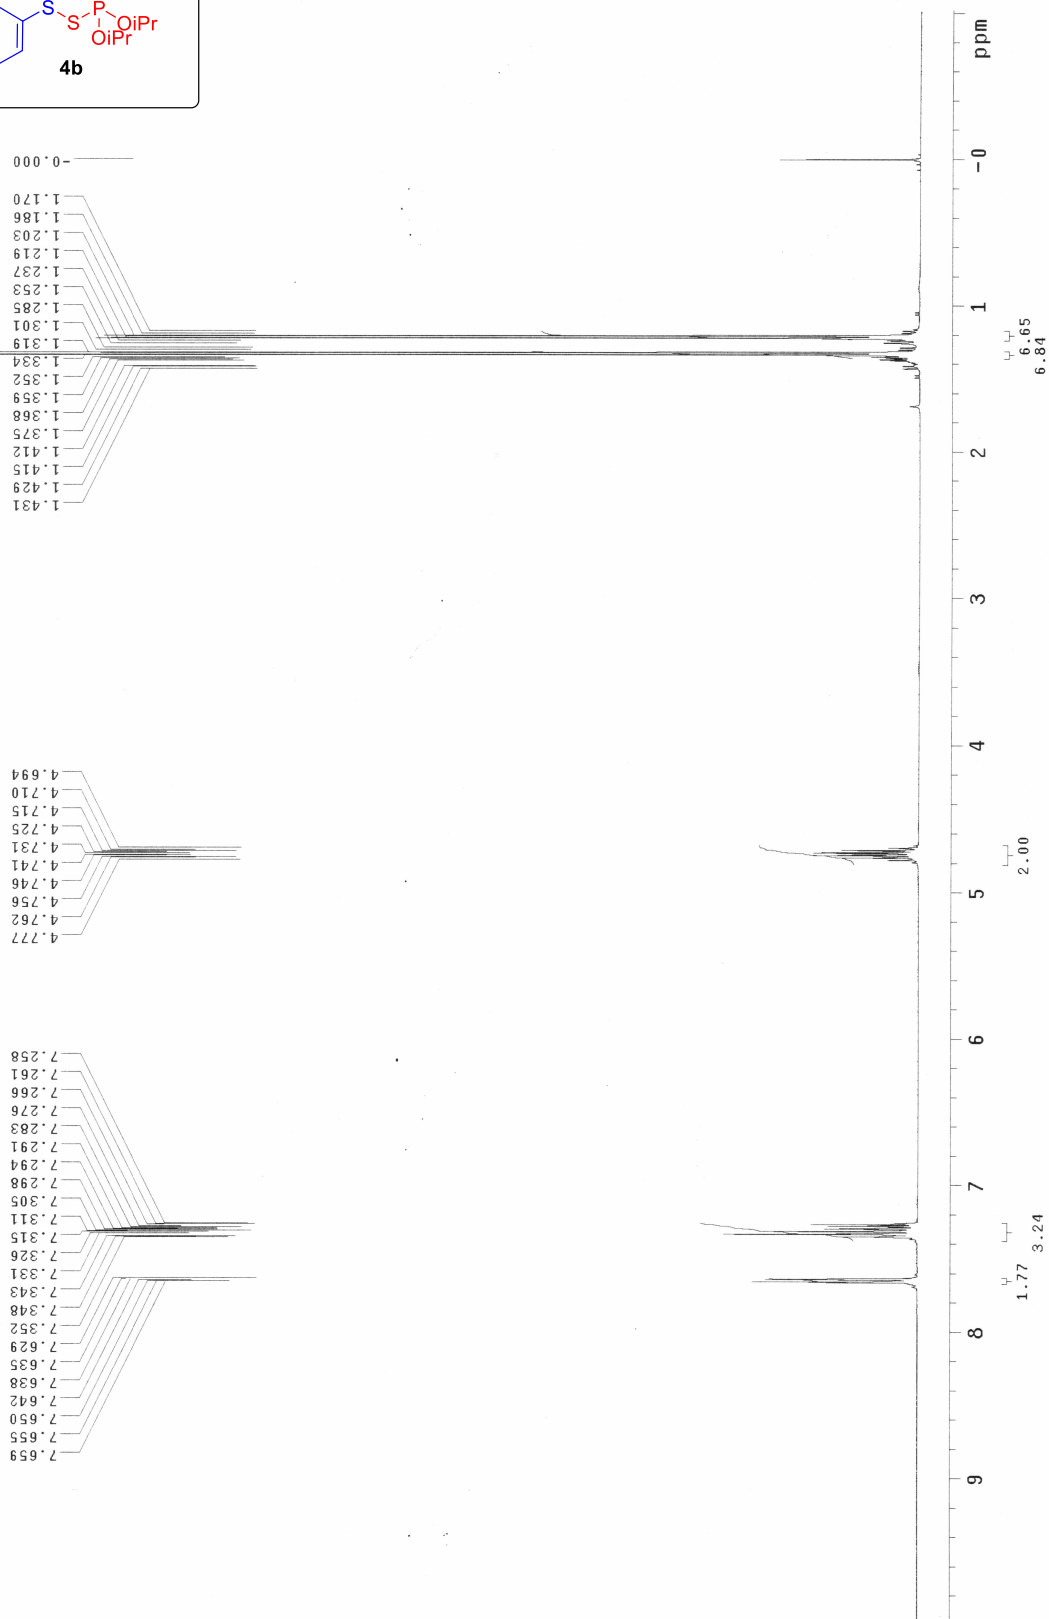

Sample: ja-x-55-h  
Sample ID: s\_20221129\_03  
File: /home/jykang/ja-x-55-h.fid  
Pulse Sequence: zgpg30



$^{13}\text{C}$  NMR (100.5 MHz) in  $\text{CDCl}_3$ 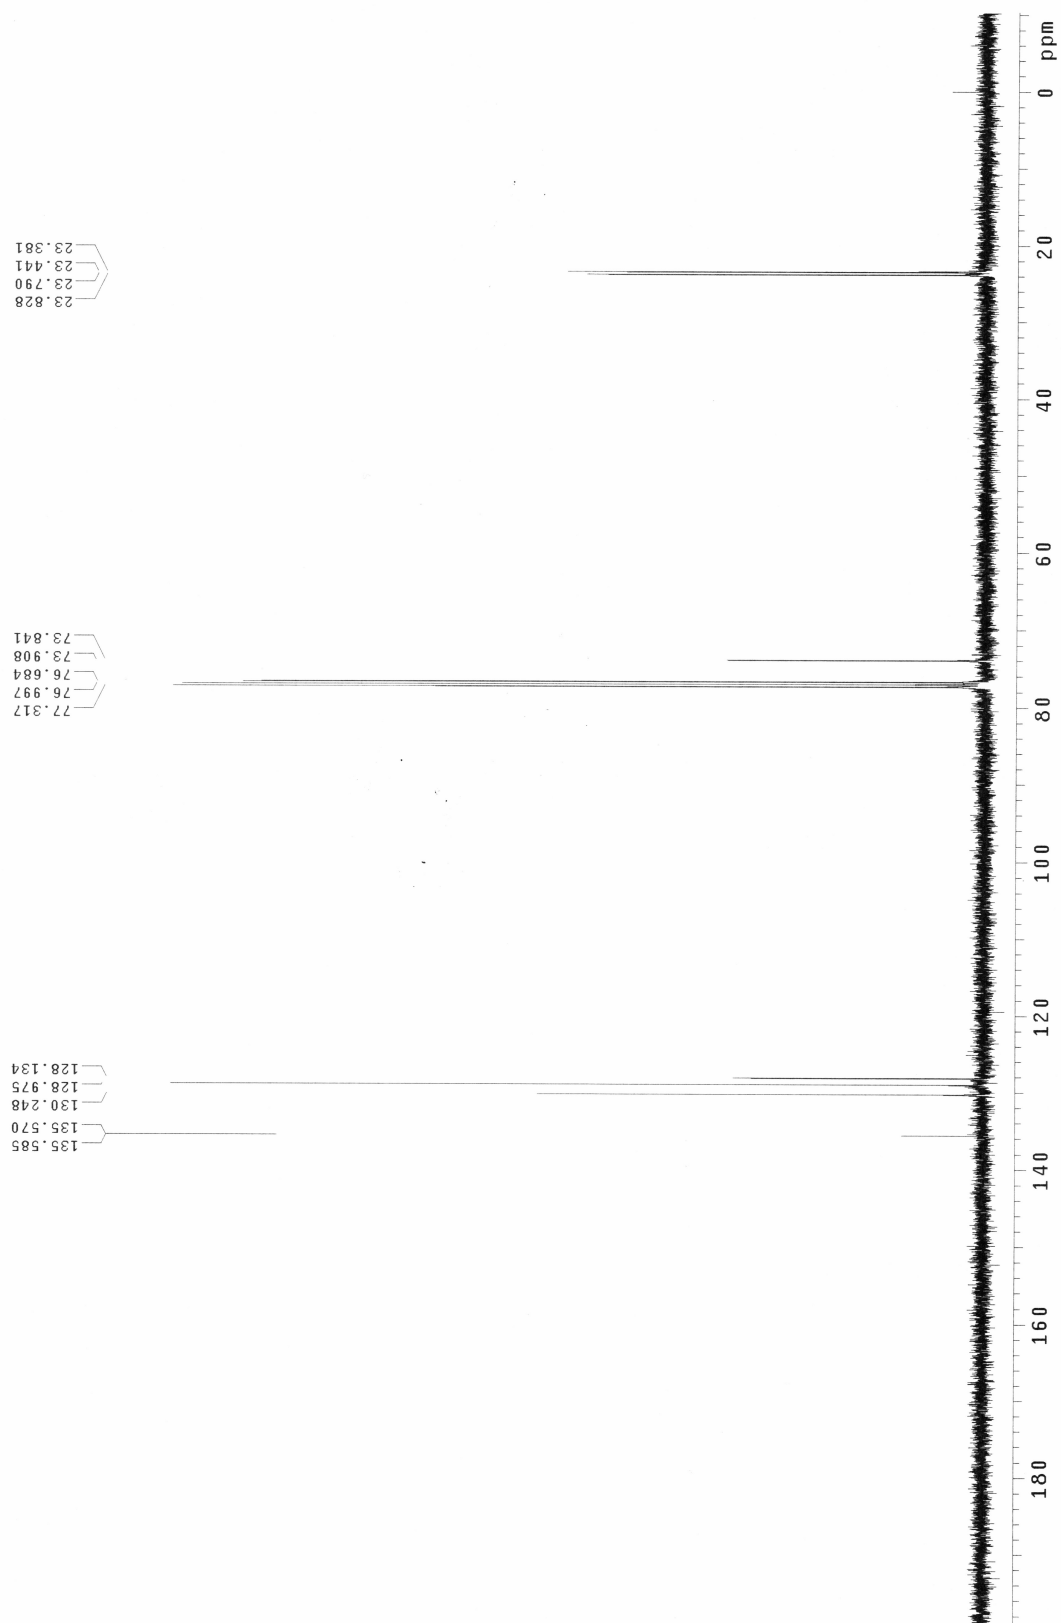

Sample: ja-x-55-c  
Sample ID: s\_20221129\_04  
File: /home/jykang/ja-x-55-c.fid  
Pulse Sequence: s2pul



**$^{31}\text{P}$  NMR (162 MHz) in  $\text{CDCl}_3$** 

Sample: Ja-x-55-p  
File: exp

Pulse Sequence: s2pul

Solvent: cd3od  
Temp: 25.0 C / 298.1 K  
Operator: jykang  
VNMR-400 "Varian-NMR"

Relax.: delay 1.000 sec  
Pulse 45.0 degrees  
Acq. time 1.600 sec  
Width 21186.4 Hz  
10 repetitions

OBSERVE P31, 161.7710681 MHz  
DECOUPLE H1, 399.6200193 MHz  
Power 40 dB  
continuously on

WALTZ-16 modulated  
DATA PROCESSING

Line broadening 1.0 Hz  
F1 size 131072  
Total time 0 min, 26 sec

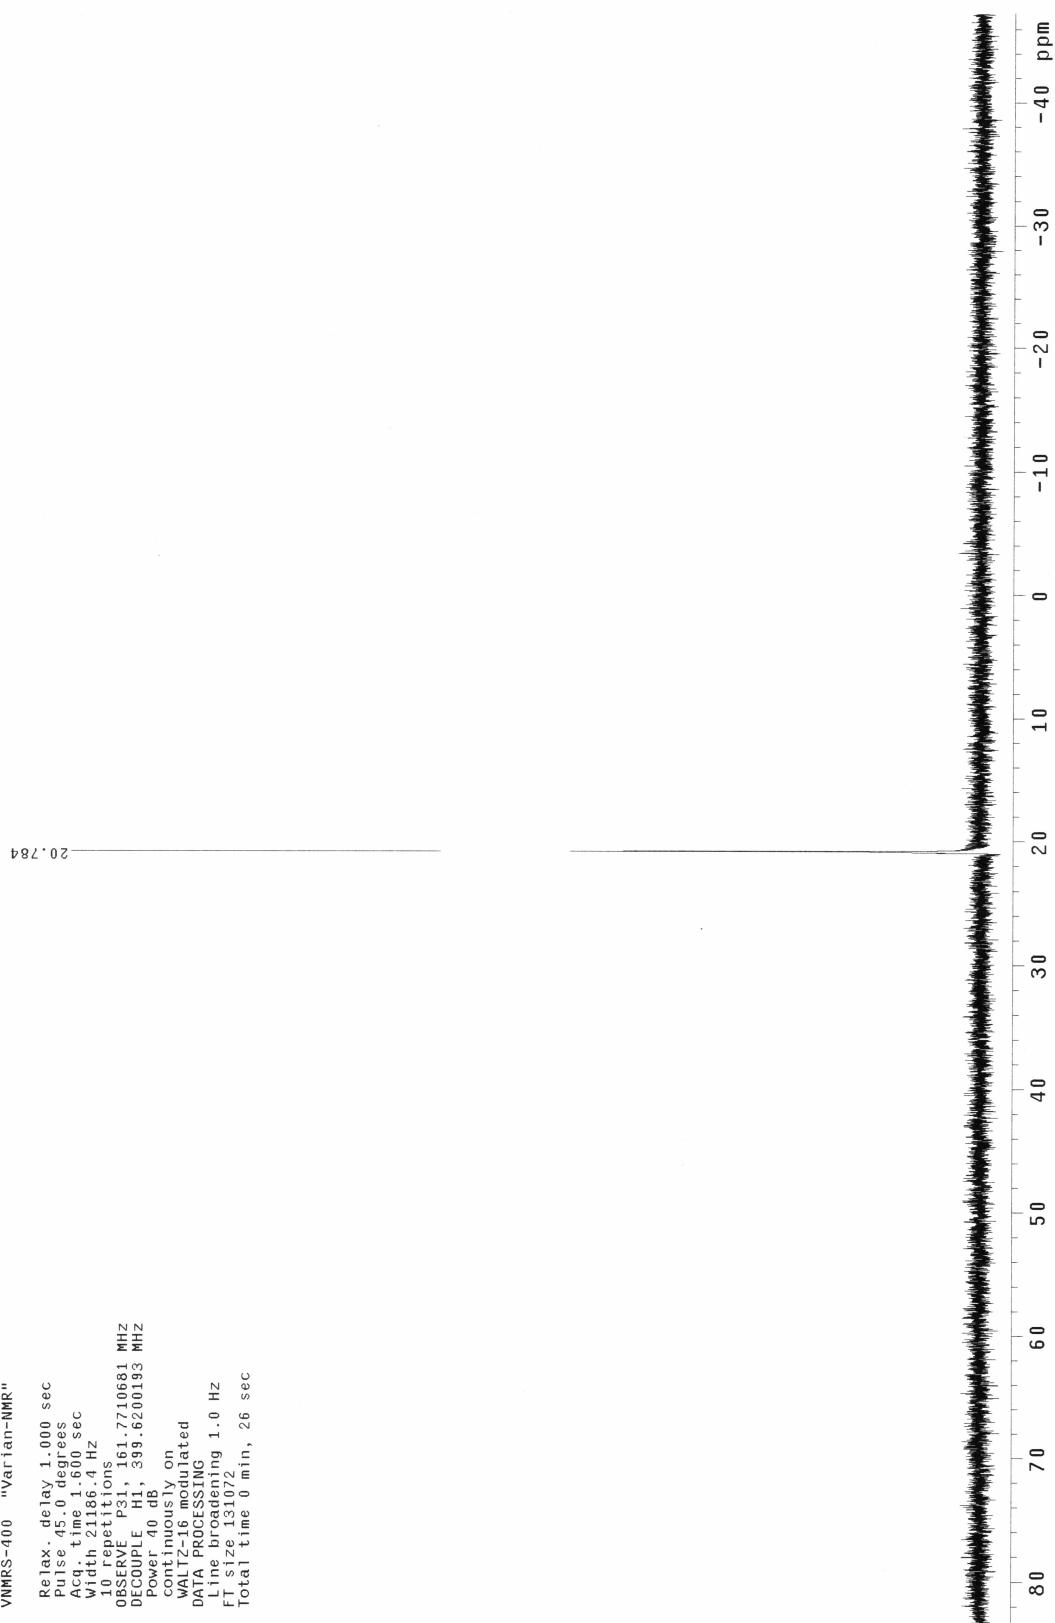



$^1\text{H}$  NMR (400 MHz) in  $\text{CDCl}_3$ 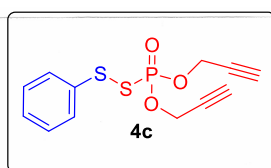

Sample: ja-xij-30-h  
Sample ID: S\_20240112\_02  
File: 0006.f1d  
Pulse Sequence: s2pu1

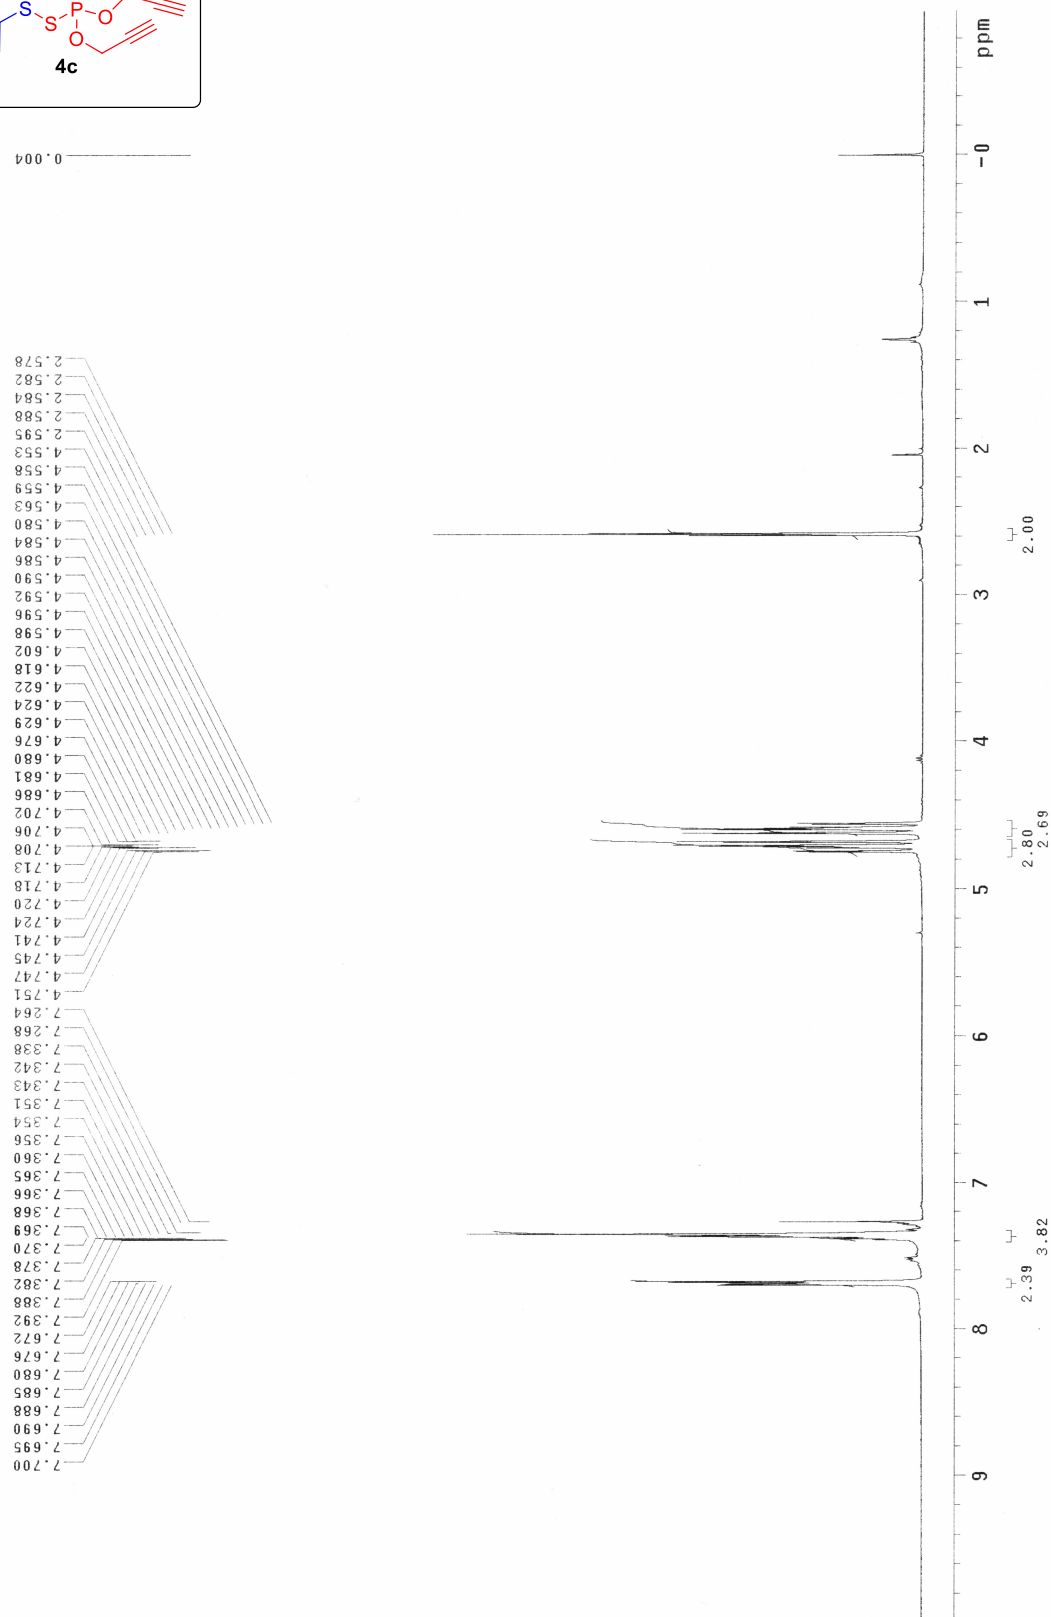



$^{13}\text{C}$  NMR (100.5 MHz) in  $\text{CDCl}_3$ 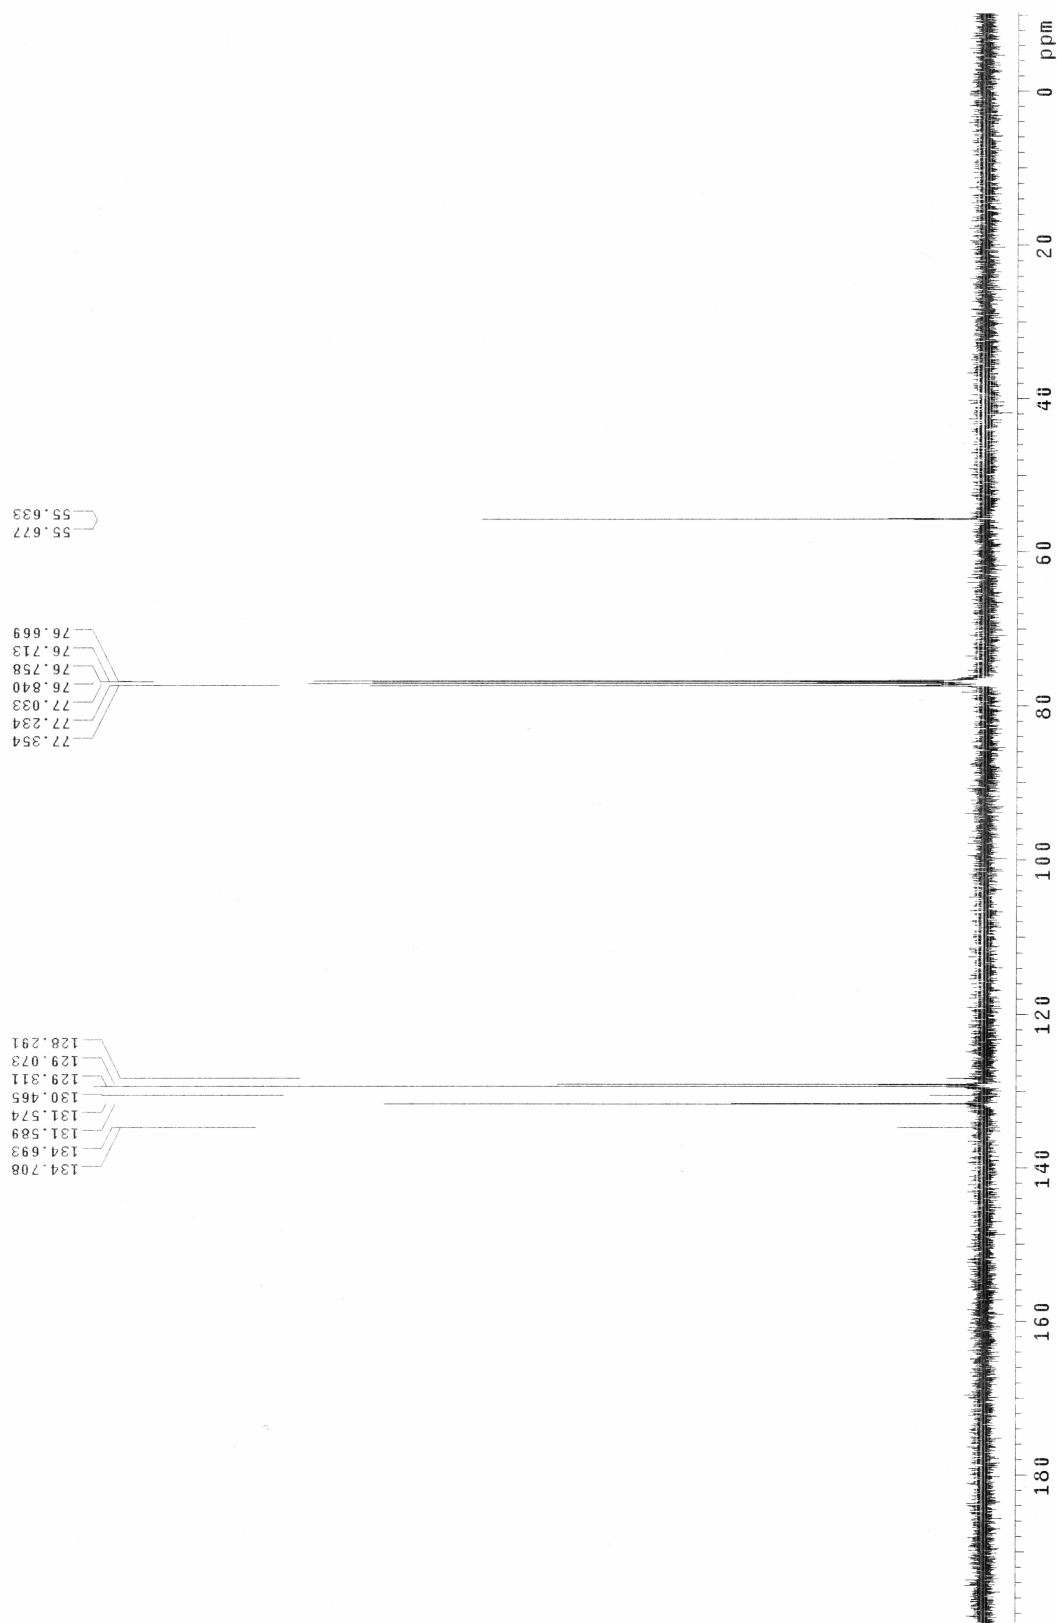

Sample: ja-xii-30-c  
Sample ID: s\_20240112\_03  
File: 0007.fid  
Pulse Sequence: s2bu1



$^{31}\text{P}$  NMR (162 MHz) in  $\text{CDCl}_3$ 

Sample: ja-xii-30-p  
File: /home/jykang/ja-xii-30-p.fid

Pulse Sequence: s2pul

Solvent: cdc13  
Temp: 25.0 C / 298.1 K  
Operator: jykang  
File: ja-xii-30-p  
VNMRS-400 "Varian-NMR"

Relax. delay 1.000 sec  
Pulse 45.0 degrees  
Acq. time 1.600 sec  
Width 21186.4 Hz  
16 repetitions  
OBSERVE P31, 161.7658777 MHz  
DECOUPLE H1, 399.6184448 MHz  
Power 40 dB  
continuously on  
WALTZ-16 modulated  
DATA PROCESSING  
Line broadening 1.0 Hz  
FI size 131072  
Total time 0 min, 42 sec

25.291

110 100 90 80 70 60 50 40 30 20 10 0 -10 ppm



$^1\text{H}$  NMR (400 MHz) in  $\text{CDCl}_3$ 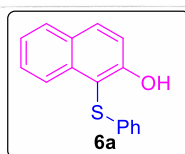

Sample: ja-xii-42-h  
Sample ID: s\_20240208\_01  
File: 0003.fid

Pulse Sequence: s2pu1

8.224  
8.203  
7.916  
7.894  
7.822  
7.802  
7.510  
7.507  
7.492  
7.489  
7.485  
7.471  
7.468  
7.388  
7.385  
7.370  
7.367  
7.365  
7.349  
7.326  
7.248  
7.190  
7.187  
7.182  
7.167  
7.154  
7.150  
7.144  
7.119  
7.116  
7.113  
7.098  
7.080  
7.037  
7.033  
7.028  
7.018  
7.015  
7.013

1.525

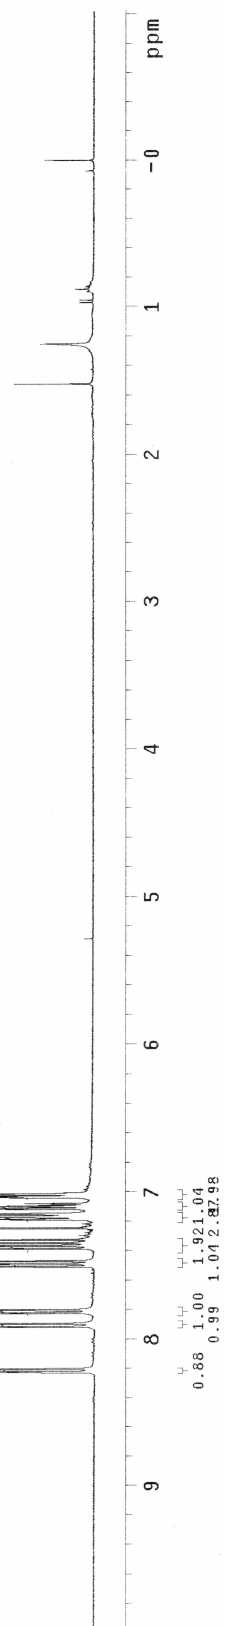



$^{13}\text{C}$  NMR (100.5 MHz) in  $\text{CDCl}_3$ 

Sample: ja-xji-02-C  
Sample ID: S\_20240208\_02  
File: 0004.fid  
Pulse Sequence: s2pu1

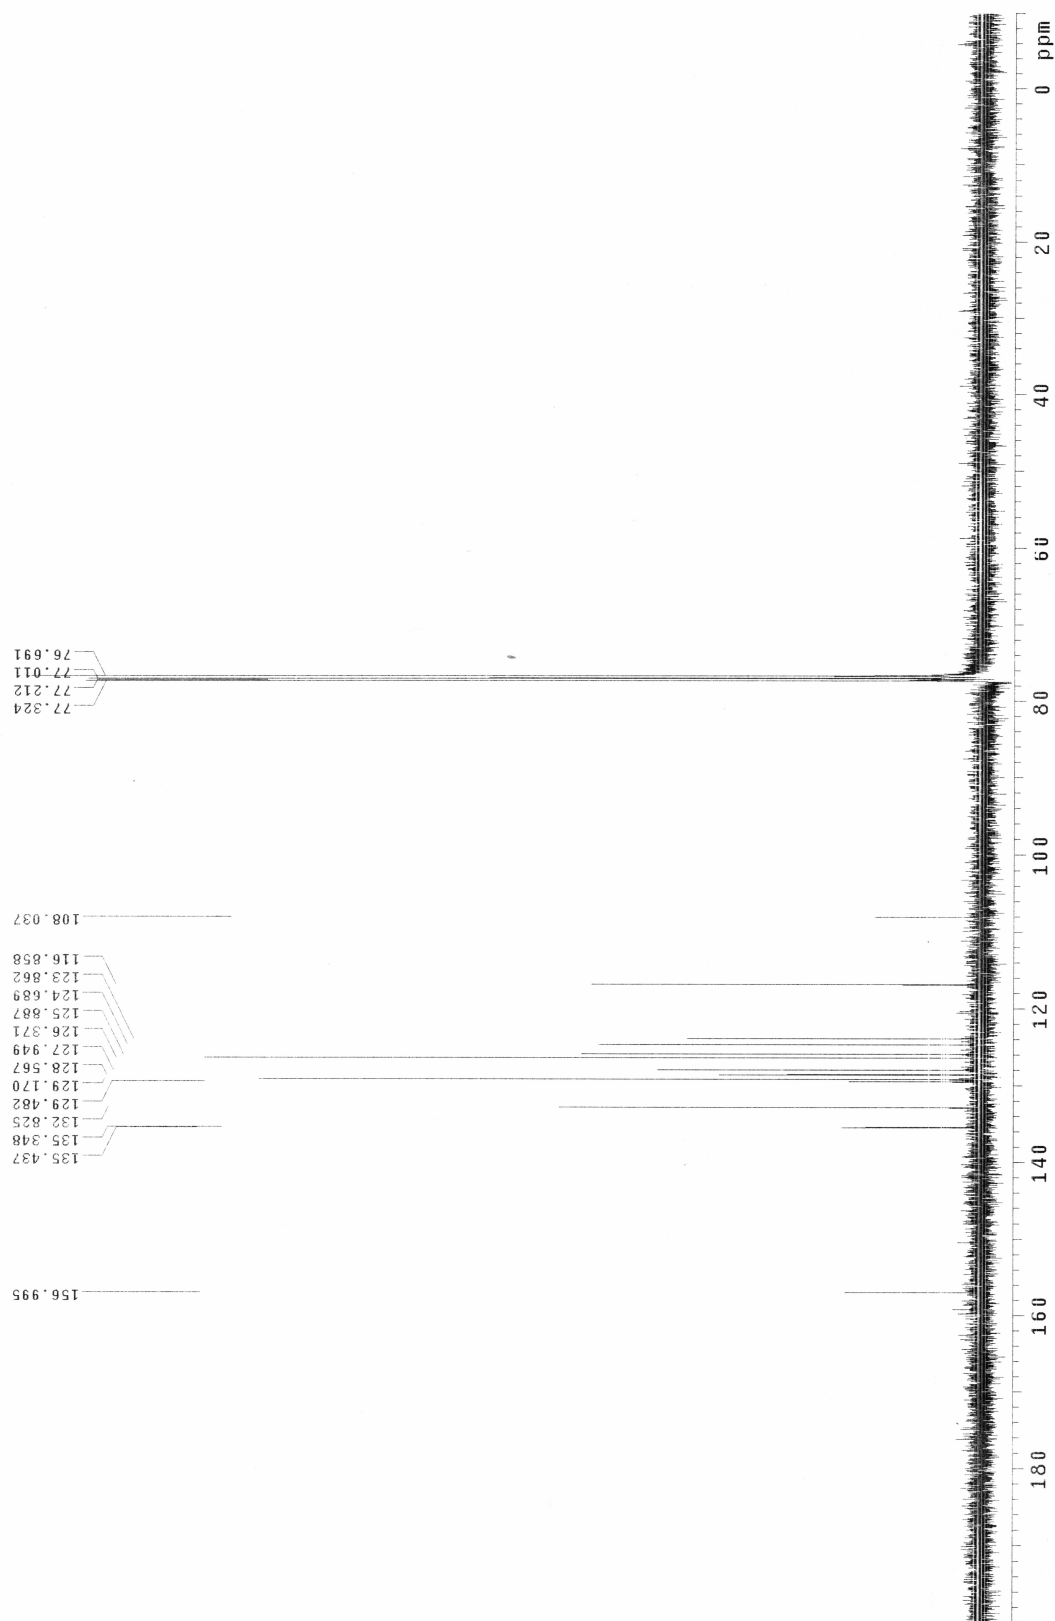



$^1\text{H}$  NMR (400 MHz) in  $\text{CDCl}_3$ 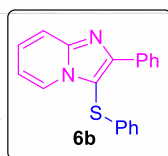

Sample: Ja-xii-31-h  
Sample ID: s\_20240119\_01  
File: 0003.f1d  
Pulse Sequence: s2pul

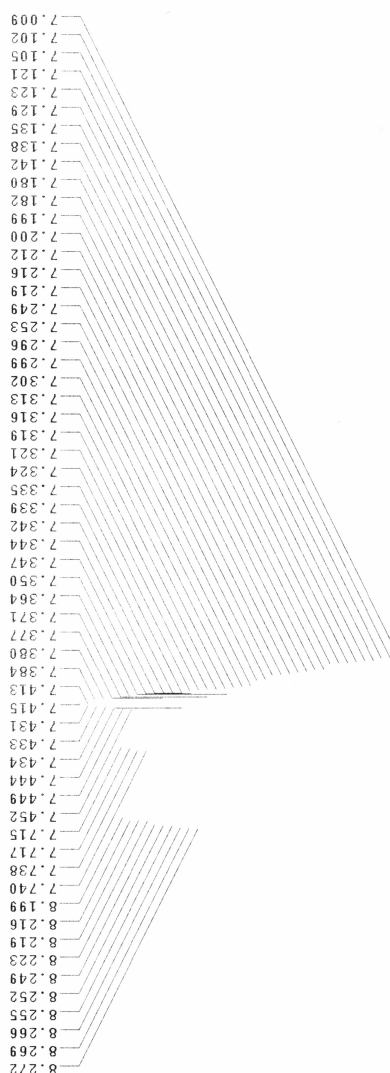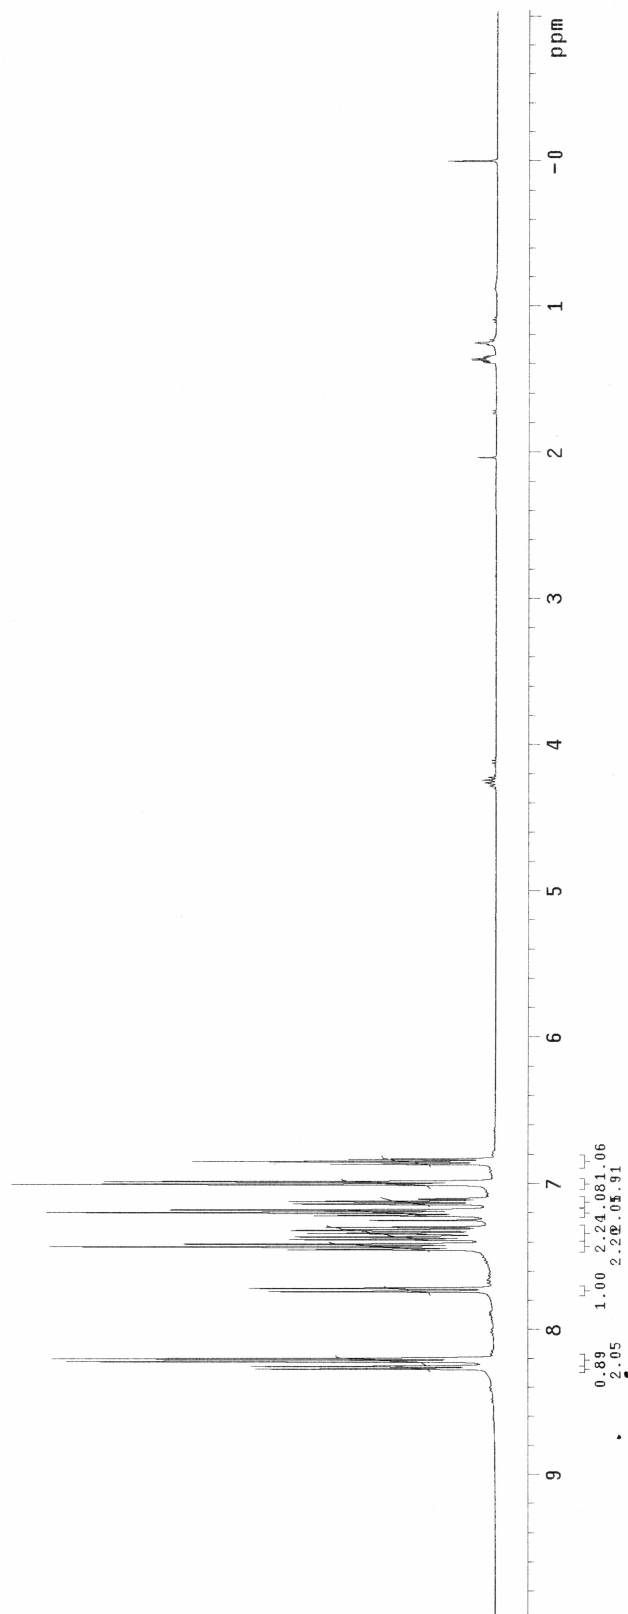



$^{13}\text{C}$  NMR (100.5 MHz) in  $\text{CDCl}_3$ 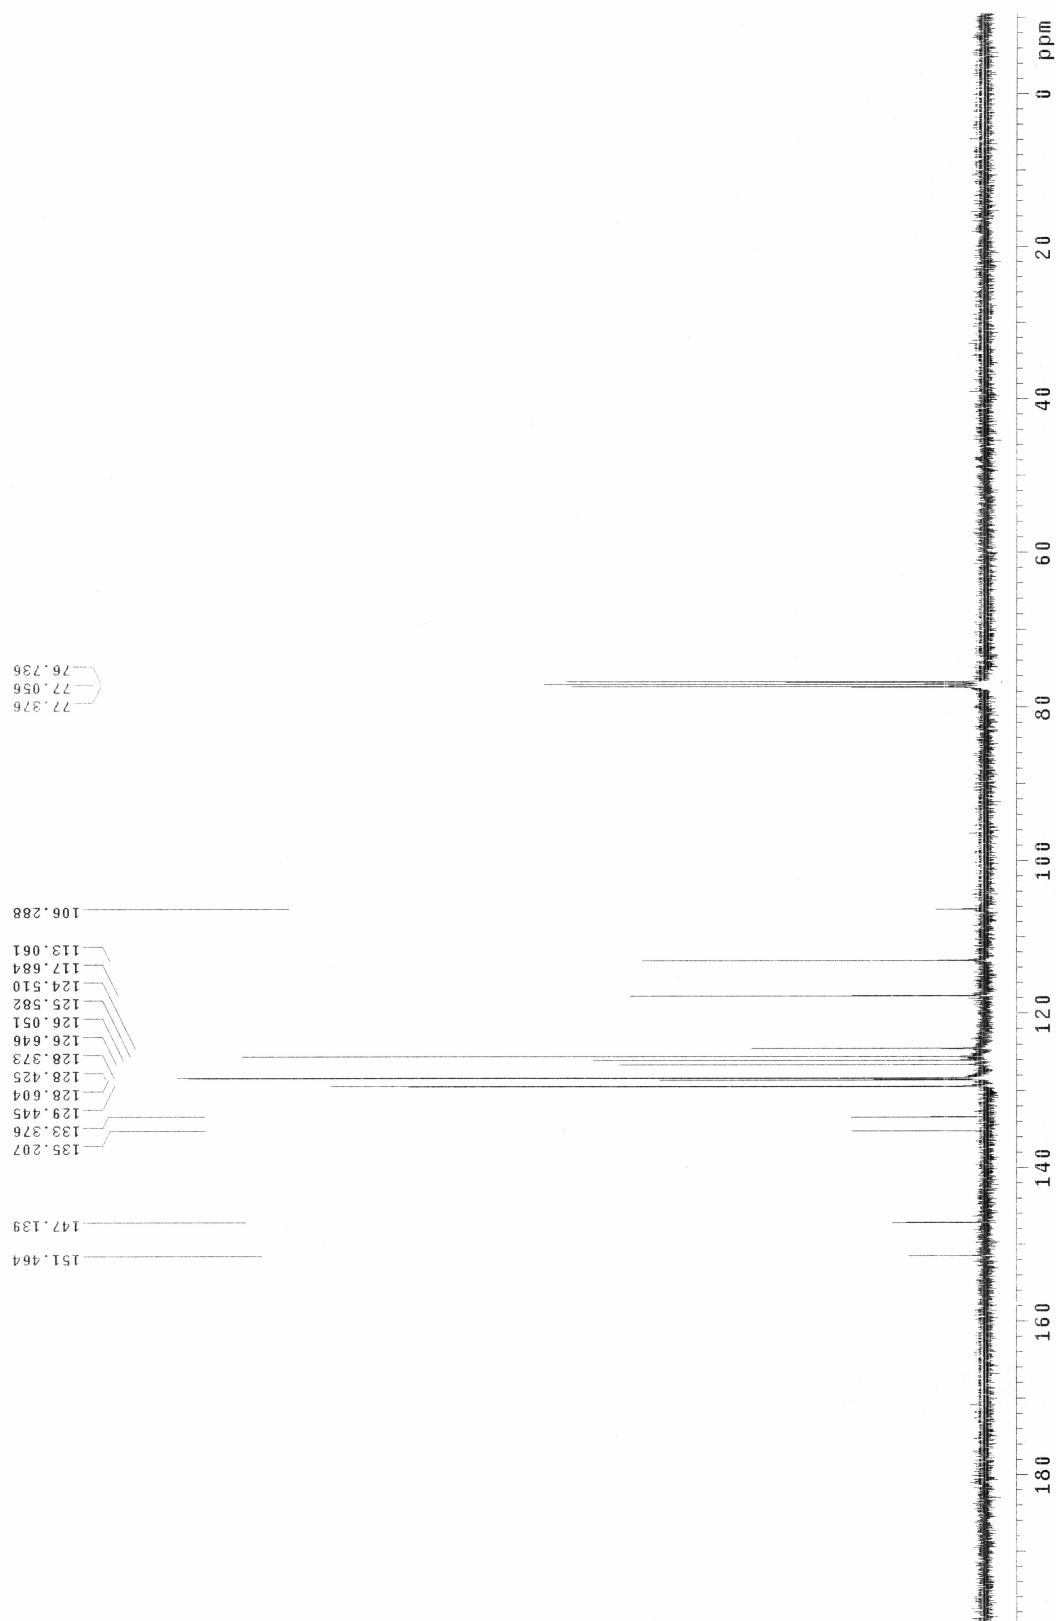

Sample: Je-xii-31-c  
Sample ID: s\_20240119\_02  
File: 0004.fId  
Pulse Sequence: s2pul



$^1\text{H}$  NMR (400 MHz) in  $\text{CDCl}_3$ 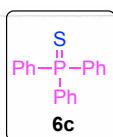

Sample: ja-xij-50-h  
Sample ID: S\_20240229\_01  
File: 0006.fid  
Pulse Sequence: s2pu1

7.750  
7.747  
7.743  
7.735  
7.730  
7.726  
7.717  
7.714  
7.710  
7.702  
7.696  
7.693  
7.594  
7.529  
7.516  
7.510  
7.505  
7.497  
7.492  
7.489  
7.470  
7.465  
7.462  
7.458  
7.455  
7.450  
7.447  
7.443  
7.439  
7.434  
7.429  
7.426  
7.421  
7.418  
7.258

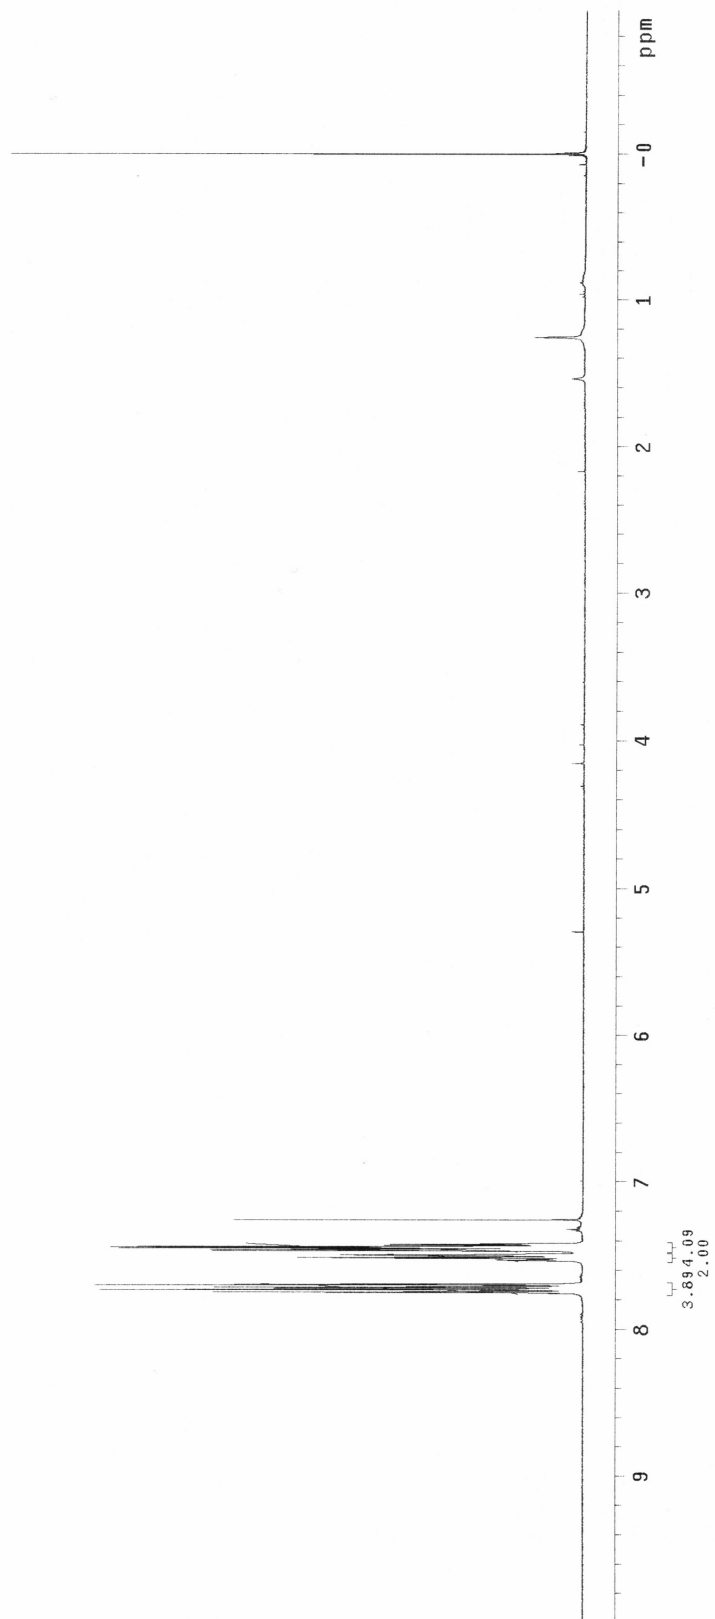



$^{13}\text{C}$  NMR (100.5 MHz) in  $\text{CDCl}_3$ 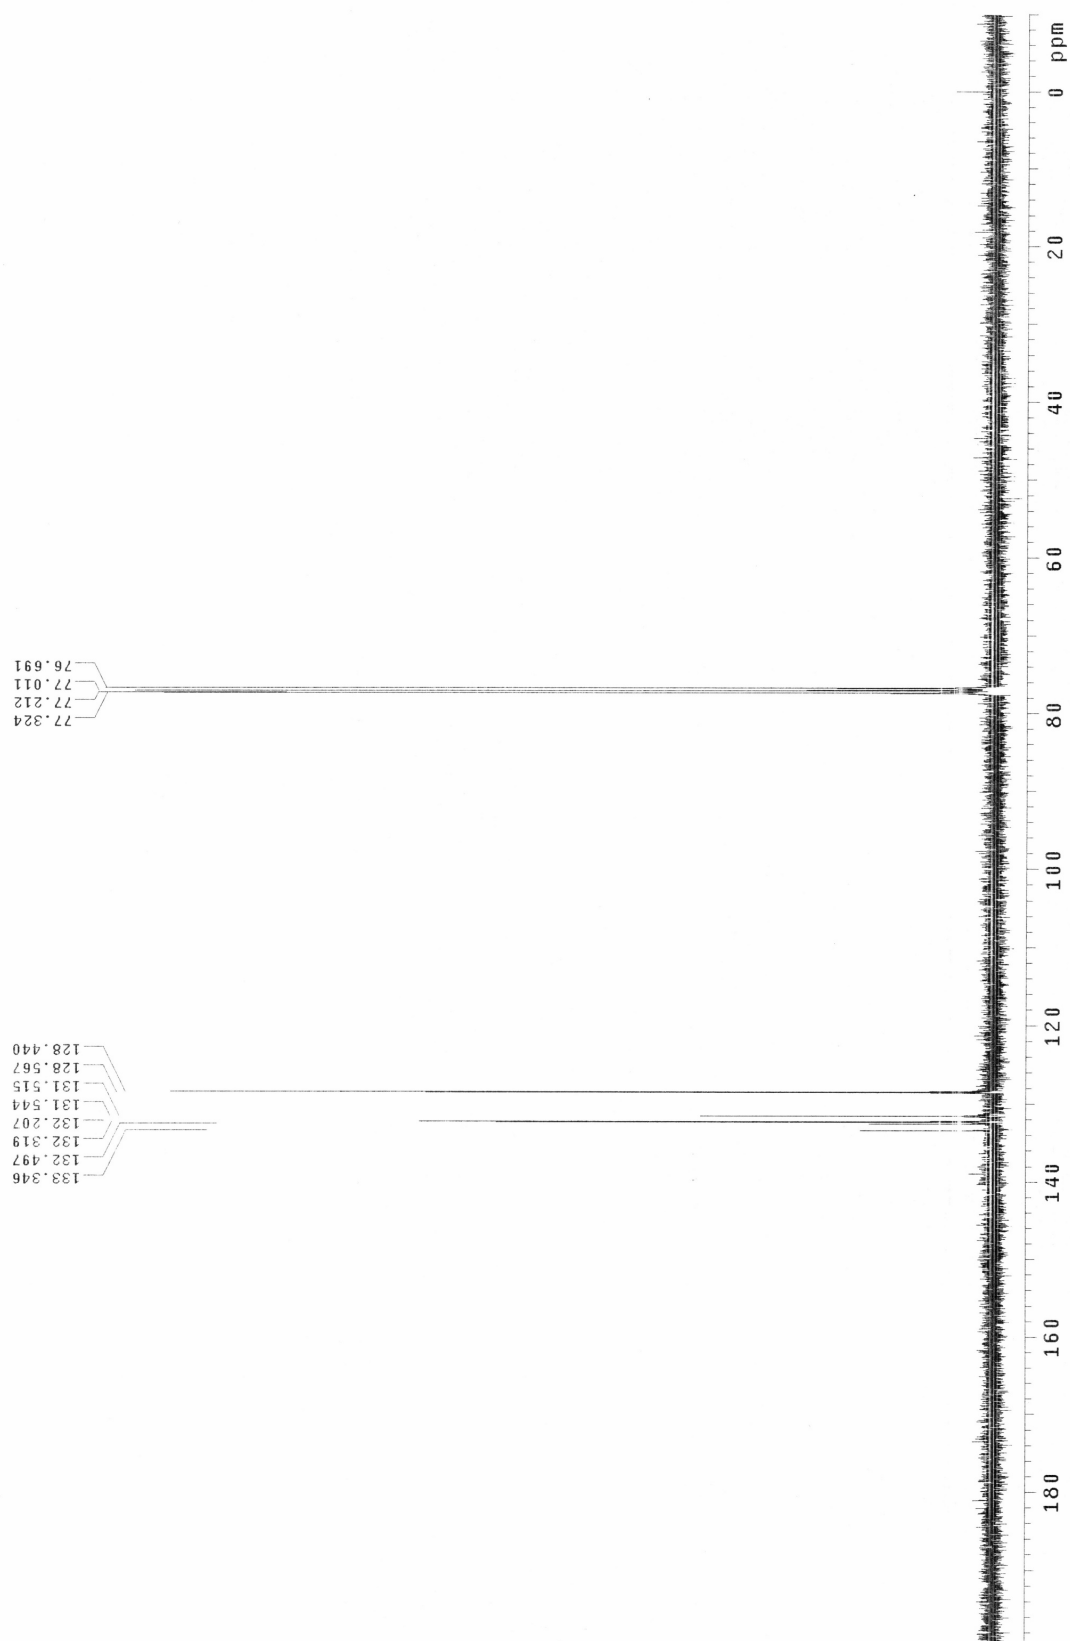

Sample: Ja-X11-50-C  
Sample ID: s\_20240229\_02  
File: 0007.fid  
Pulse Sequence: s2pul1



**$^{31}\text{P}$  NMR (162 MHz) in  $\text{CDCl}_3$** 

Sample: ja-xii-50-p  
File: exp  
Pulse Sequence: s2pul  
Solvent: cdc13  
Temp: 25.0 C / 298.1 K  
Operator: JyKang  
VNMRK-400 "Varian-NMR"  
Relax. delay 1.000 sec  
Pulse 45.0 degrees  
Acq. time 1.600 sec  
Width 21186.4 Hz  
16 repetitions  
OBSERVE P31, 161.7658777 MHz  
DECOUPLE H1, 399.6184448 MHz  
Power 40 dB  
continuously on  
WALTZ-16 modulated  
DATA PROCESSING  
Line broadening 1.0 Hz  
F1 size 131072  
Total time 0 min, 42 sec

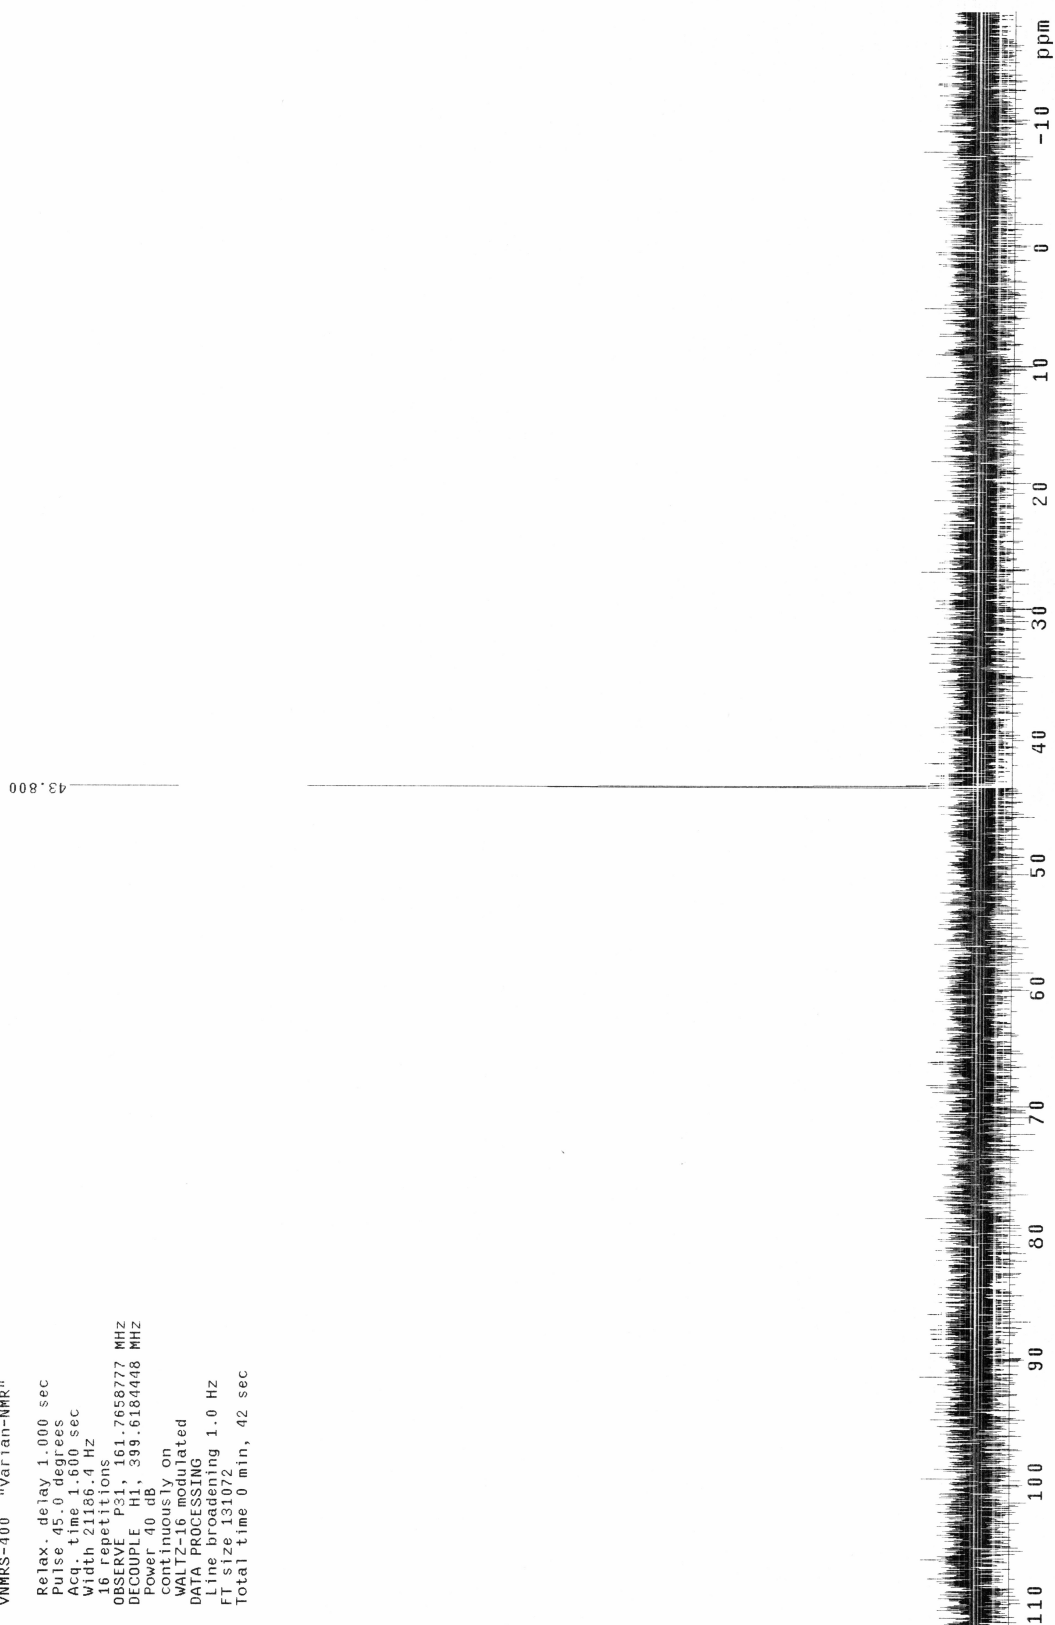



$^1\text{H}$  NMR (400 MHz) in  $\text{CDCl}_3$ 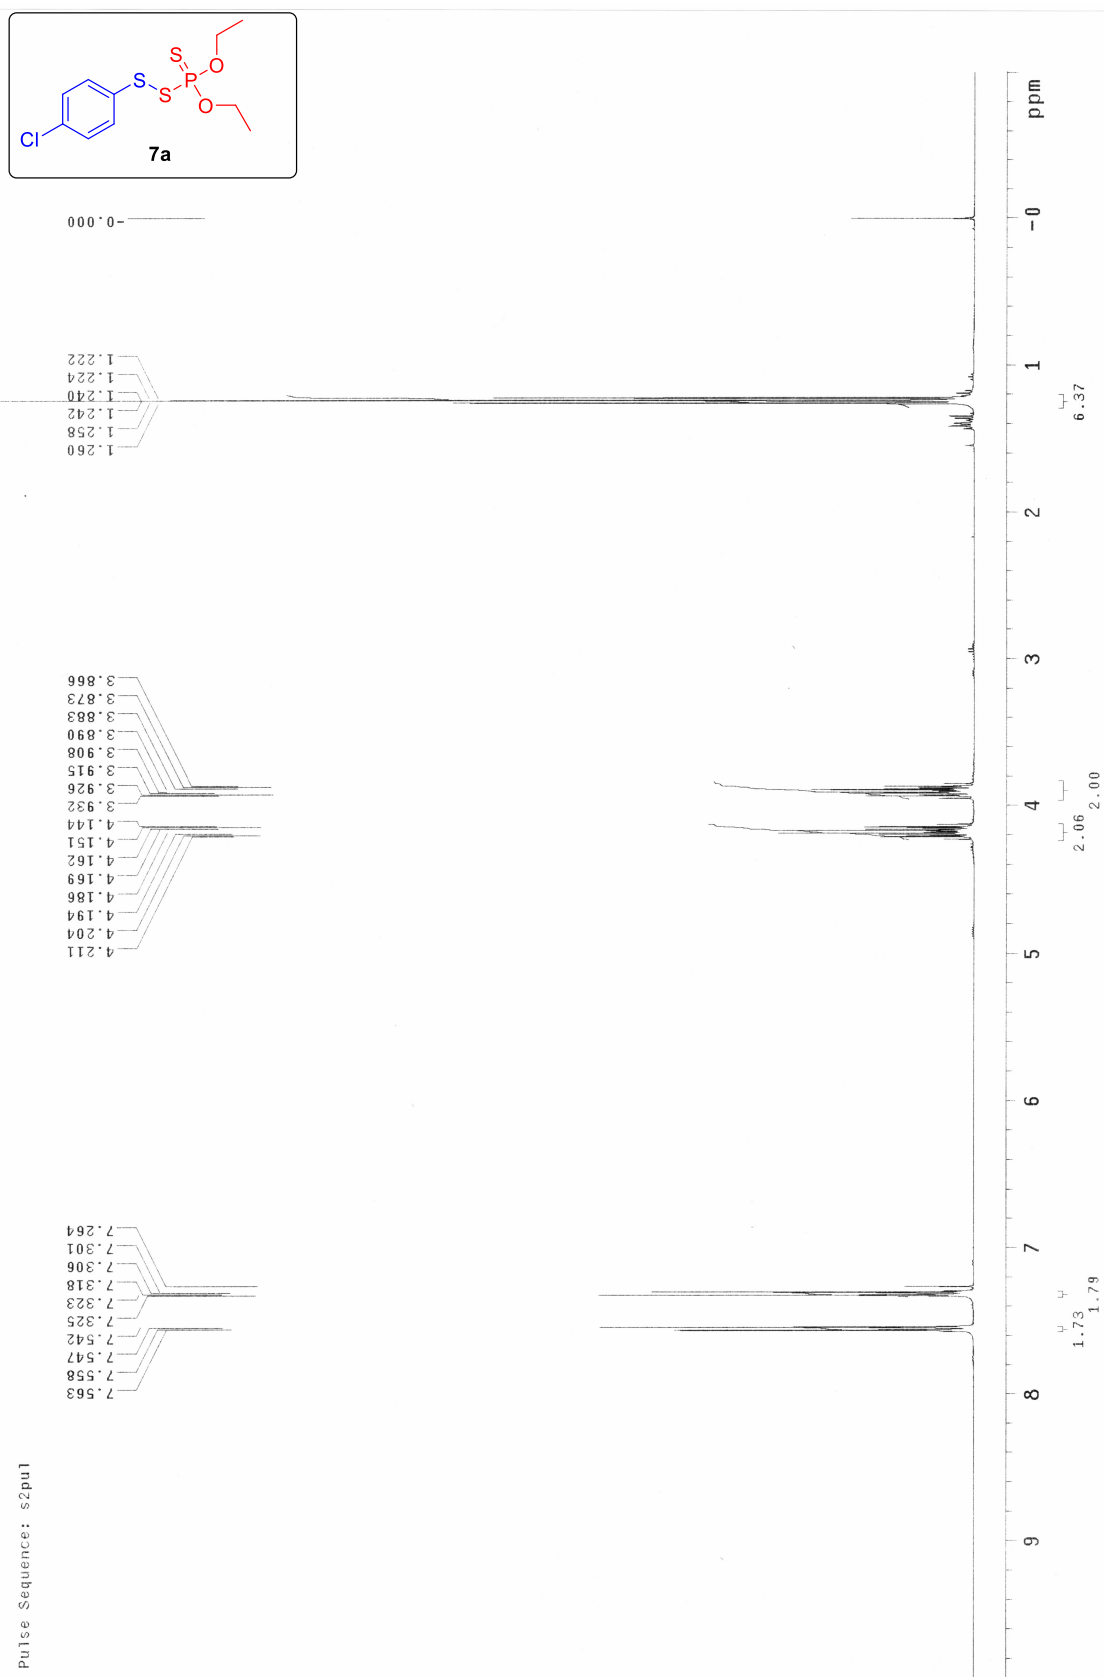



$^{13}\text{C}$  NMR (100.5 MHz) in  $\text{CDCl}_3$ 

Sample: ja-xii-62-c  
Sample ID: s\_20240228\_02  
File: 0002.f1d  
Pulse Sequence: s2pul

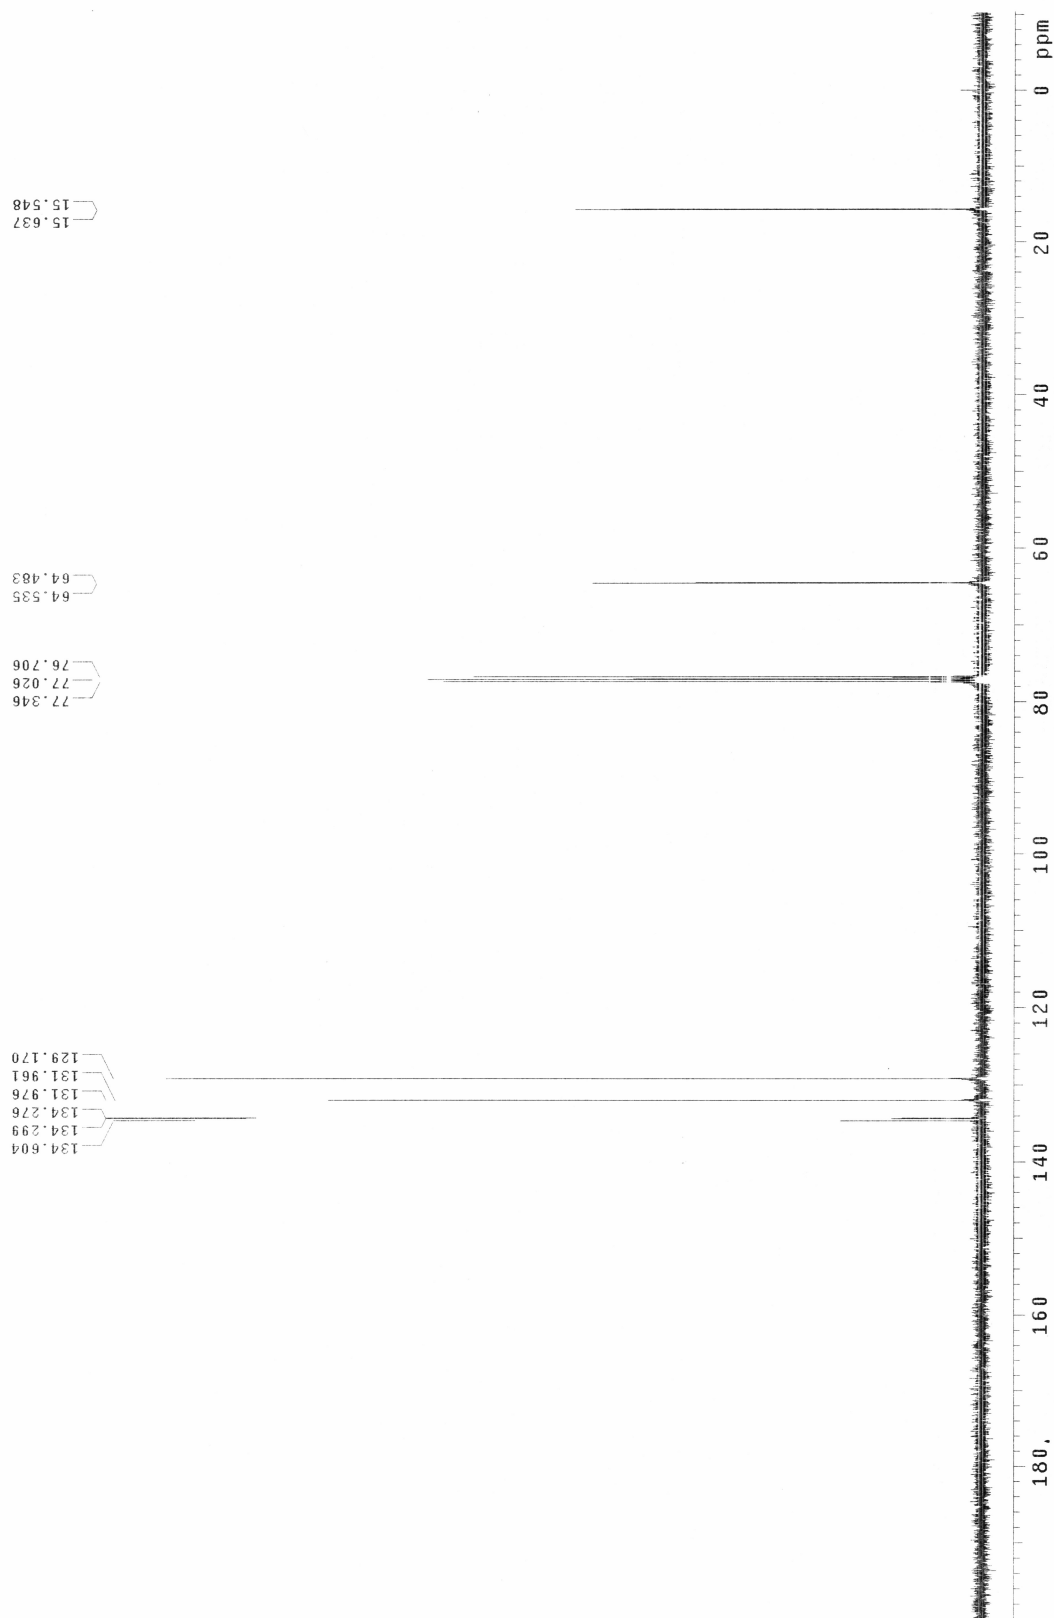



**$^{31}\text{P}$  NMR (162 MHz) in  $\text{CDCl}_3$** 

Sample: ja-xii-62-p  
File: exp

Pulse Sequence: s2pul  
Solvent: cdcl3  
Temp: 25.0 C / 298.1 K  
Operator: Jykang  
VNMR-400 "Varian-NMR"

Relax. delay 1.000 sec  
Pulse 45.0 degrees  
Acq. time 1.600 sec  
Width 21186.4 Hz  
16 repetitions

Observed  $^{31}\text{P}$  161.7658777 MHz  
Decouple  $^1\text{H}$  399.018448 MHz

Continuously on  
WALTZ-16 modulated  
DATA PROCESSING  
Line broadening 1.0 Hz  
FI size 131072  
Total time 0 min, 42 sec

86.247

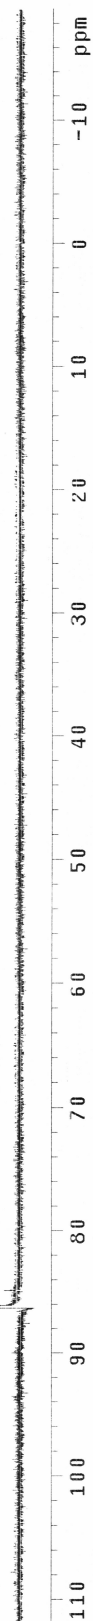



$^1\text{H}$  NMR (400 MHz) in  $\text{CDCl}_3$ 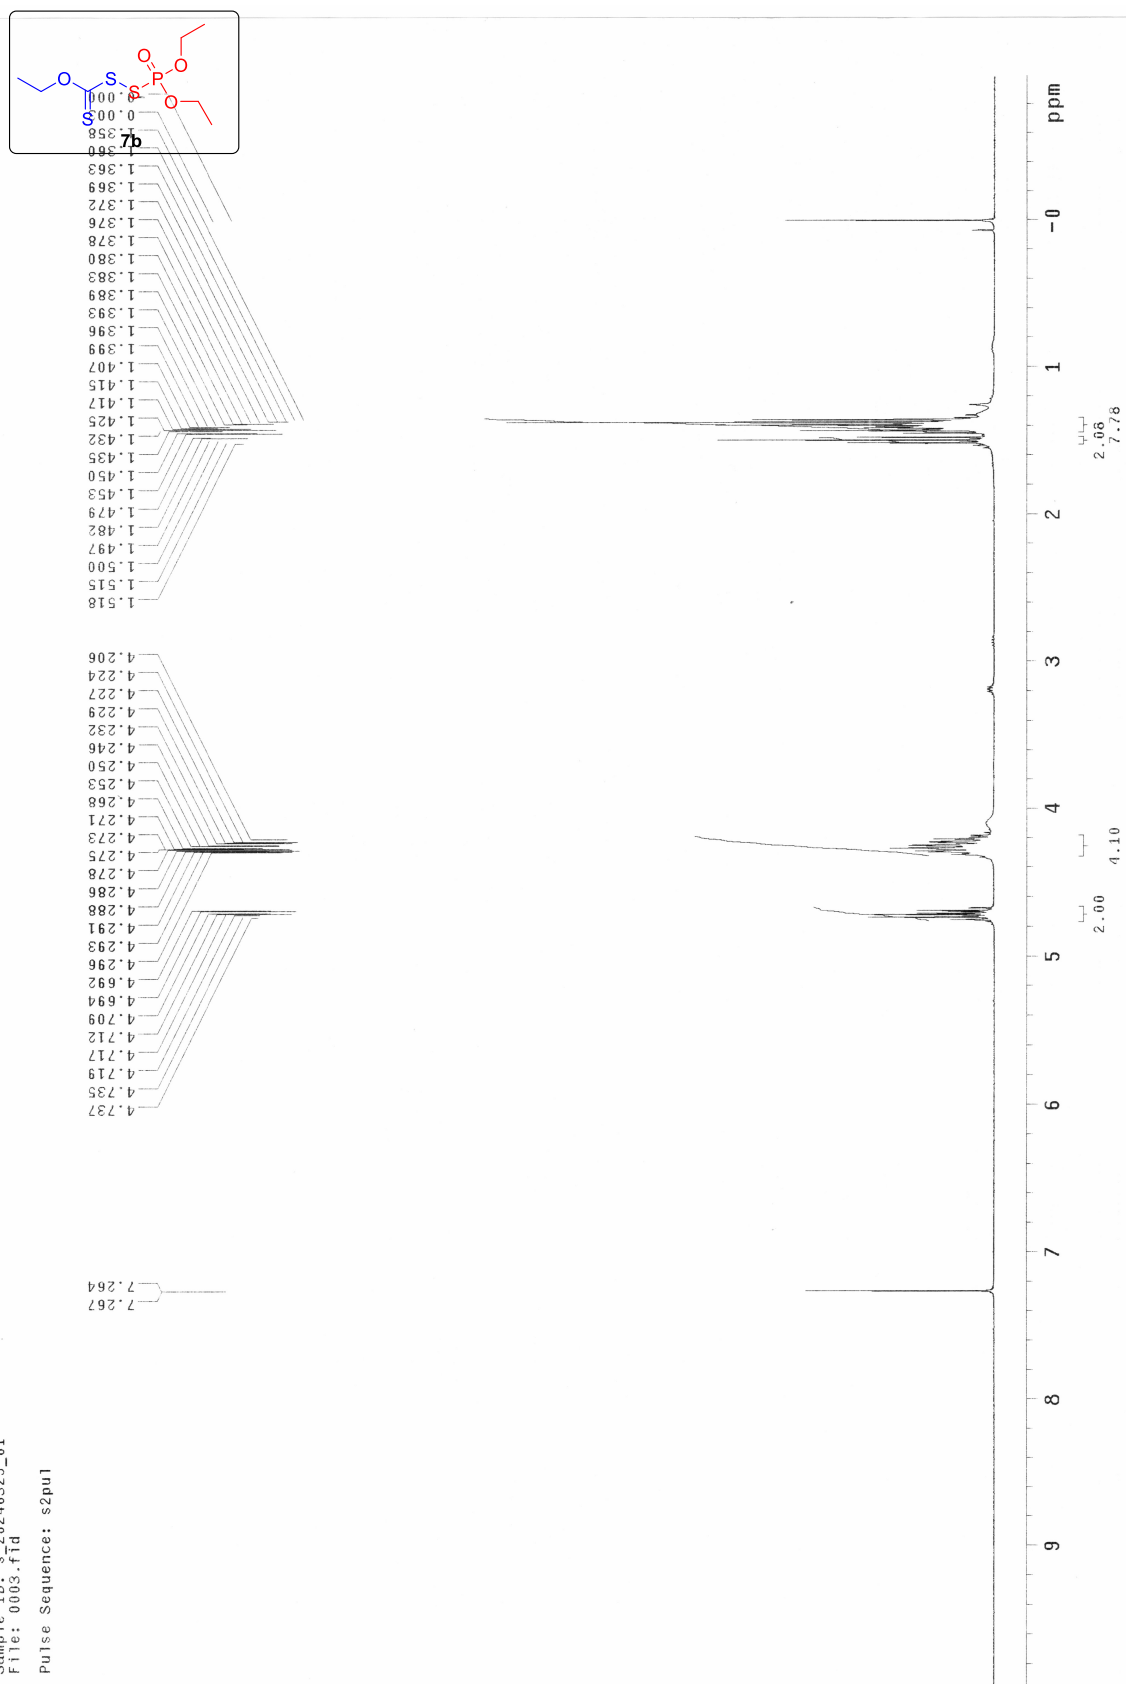

Sample: Ja-xii-75-h  
Sample ID: S20240325\_01  
File: 0003.fid  
Pulse Sequence: s2pul



$^{13}\text{C}$  NMR (100.5 MHz) in  $\text{CDCl}_3$ 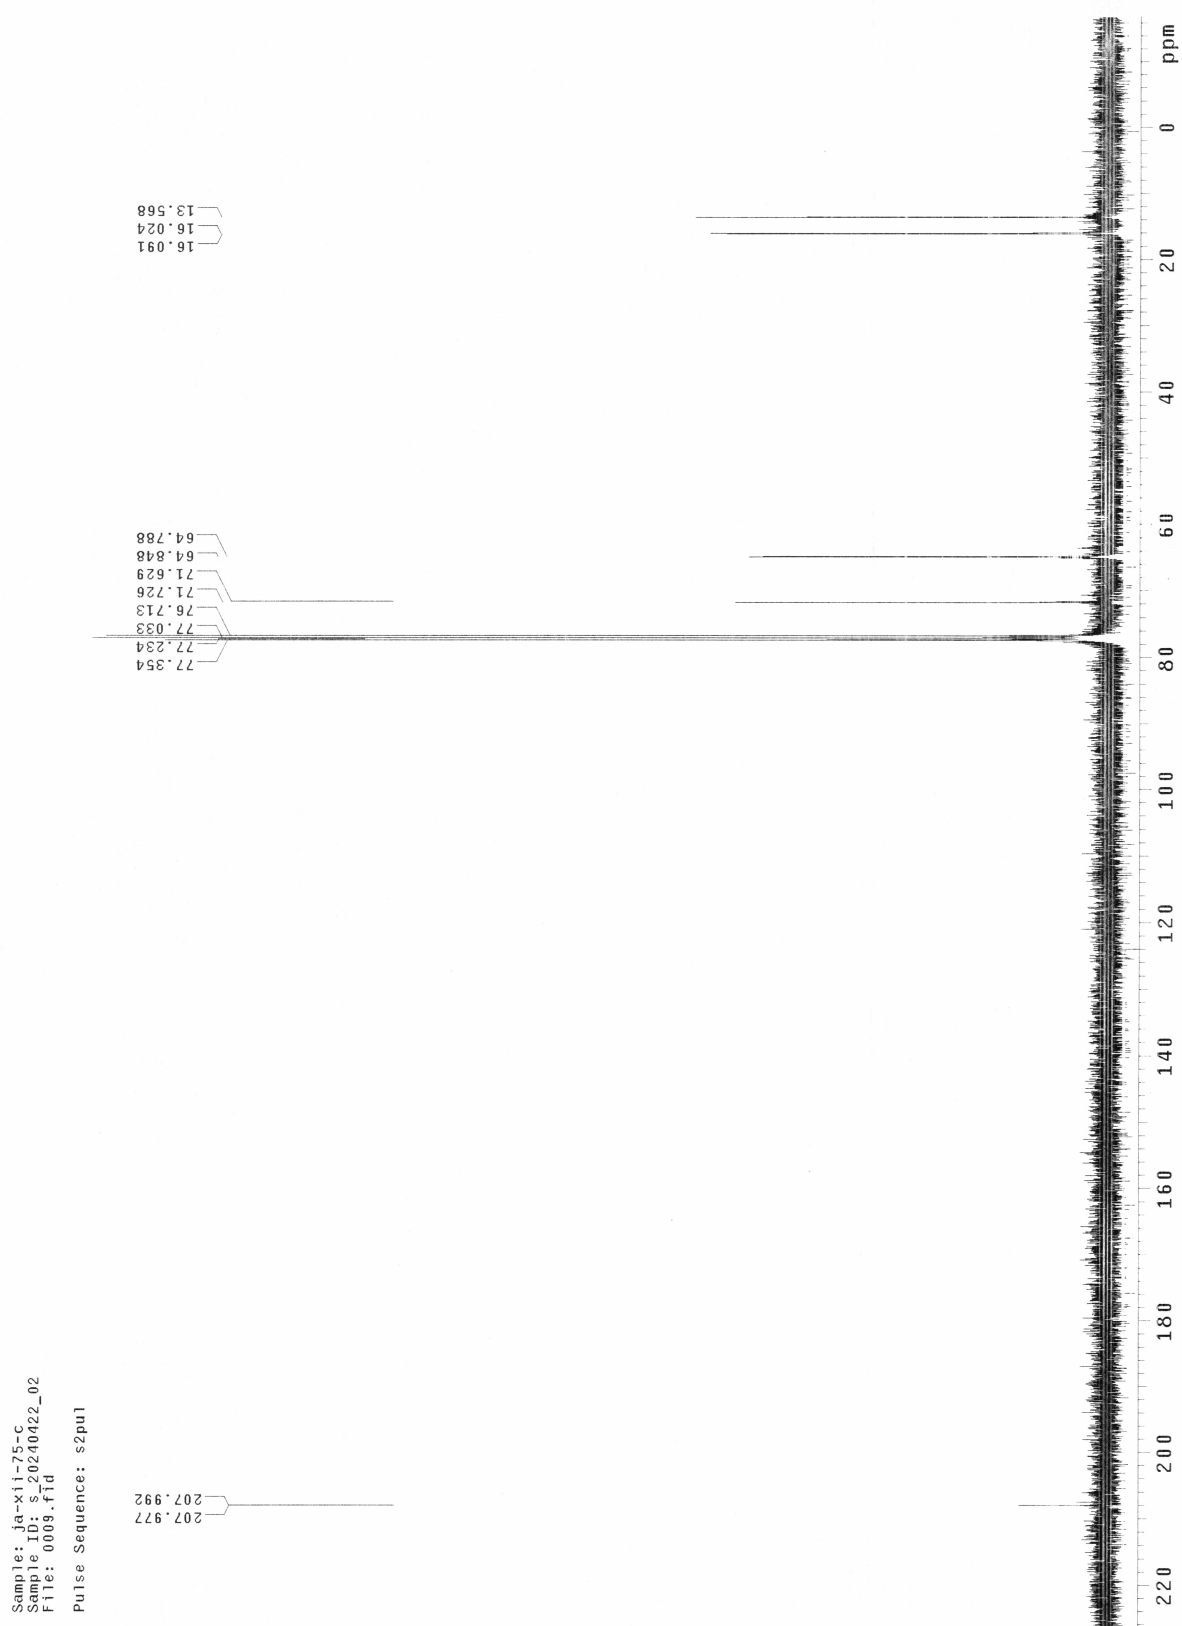



**$^{31}\text{P}$  NMR (162 MHz) in  $\text{CDCl}_3$** 

Sample: ja-xii-75-p  
File: exp

Pulse Sequence: s2pul

Solvent:  $\text{cdCl}_3$   
Temp: 25.0 C / 298.1 K  
Operator: Jykang  
VNMR-400 "Varian-NMR"

Relax. delay 1.000 sec  
Pulse 45.0 degrees  
Acq. time 1.600 sec  
Width 21186.4 Hz  
64 repetitions  
OBSERVE P31, 161.7652379 MHz  
DECOUPLE H1, 399.6184448 MHz  
Power 40 dB  
continuously on  
WALTZ-16 modulated  
DATA PROCESSING  
Line broadening 1.0 Hz  
FT size 131072  
Total time 2 min, 47 sec

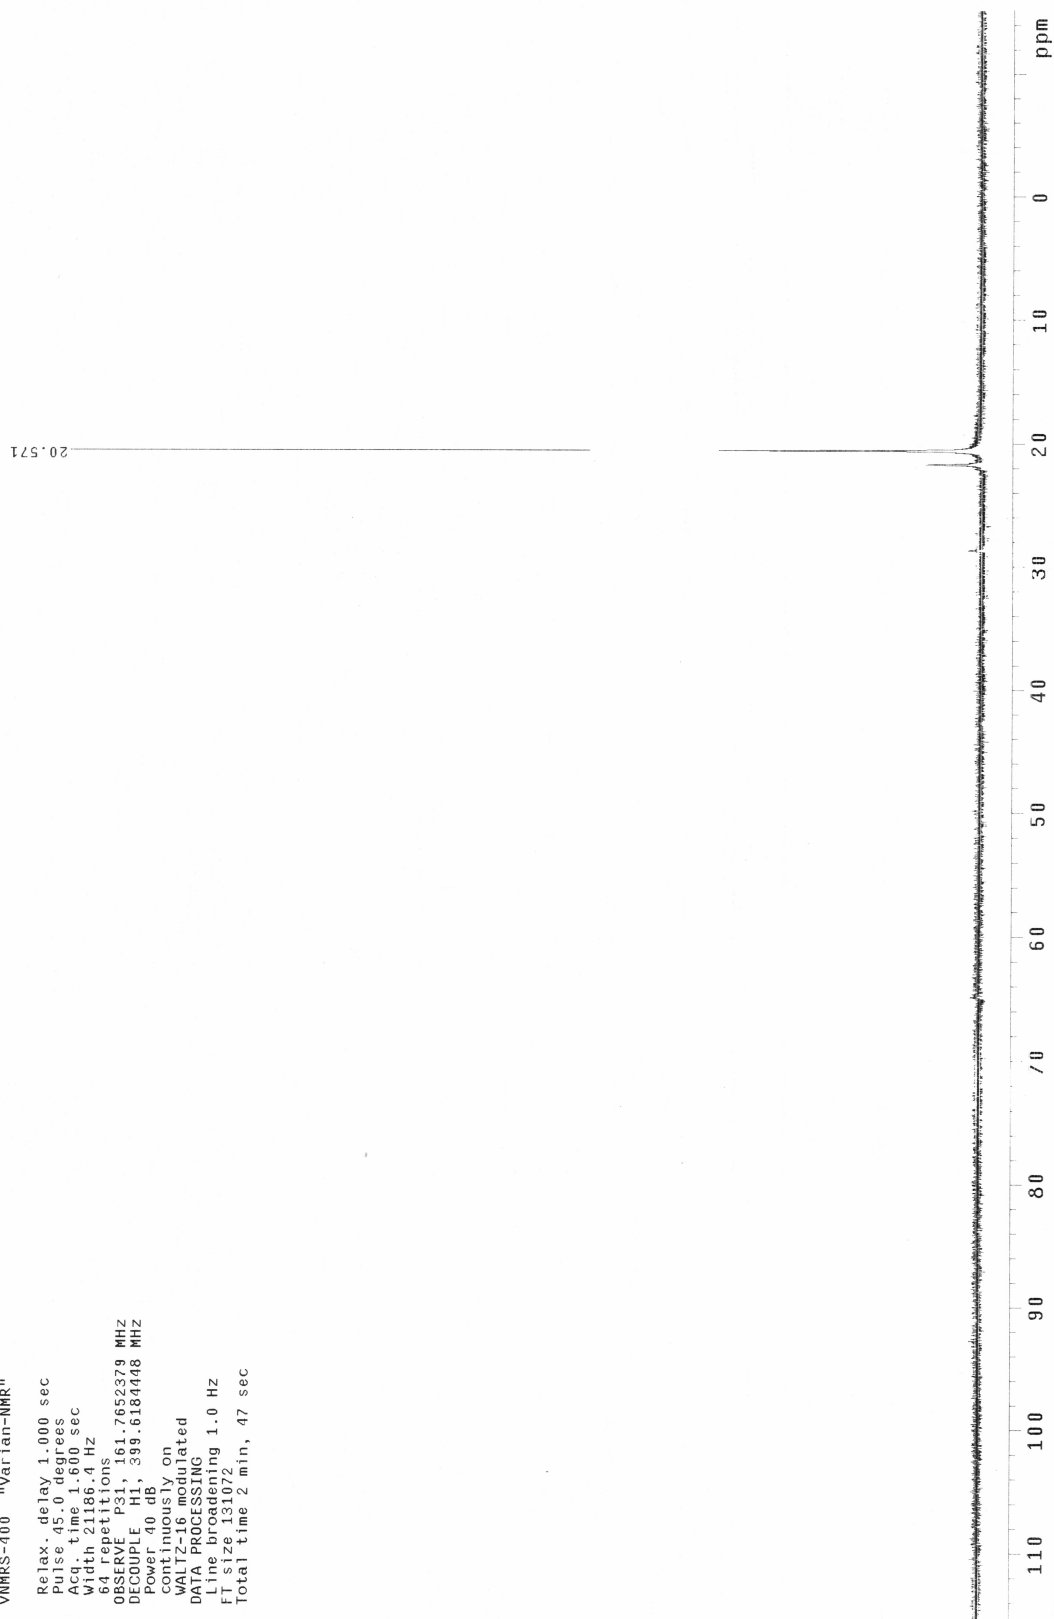

Supplement: d4ob01099j1.pdf [file d4ob01099j1.pdf]
